# Supplementary material for: Fusarisolins A–E, Polyketides from the Marine-Derived Fungus Fusarium solani H918
Source: PubMed Central journal article supplement (PMC6410219; doi:10.3390/md17020125), 2019-02-20
Supplement: marinedrugs-17-00125-s001.pdf [file marinedrugs-17-00125-s001.pdf]

# Supporting Information

## **Fusarisolins A–E, Polyketides from the Marine-Derived Fungus *Fusarium solani* H918**

*Siwen Niu, Xi-Xiang Tang, Zuowang Fan, Jin-Mei Xia, Chun-Lan Xie, and Xian-Wen*

*Yang \**

State Key Laboratory Breeding Base of Marine Genetic Resources, Key Laboratory of Marine Genetic Resources, Fujian Key Laboratory of Marine Genetic Resources, South China Sea Bio-Resource Exploitation and Utilization Collaborative Innovation Center, Third Institute of Oceanography, Ministry of Natural Resources, 184 Daxue Road, Xiamen 361005, People's Republic of China

## Contents

**Figure S1-1**  $^1\text{H}$  NMR Spectrum of **1** in  $\text{CD}_3\text{OD}$  (400 MHz)

**Figure S1-2**  $^{13}\text{C}$  Spectrum of **1** in  $\text{CD}_3\text{OD}$  (100 MHz)

**Figure S1-3** HSQC Spectrum of **1** in  $\text{CD}_3\text{OD}$

**Figure S1-4** COSY Spectrum of **1** in  $\text{CD}_3\text{OD}$

**Figure S1-5** HMBC Spectrum of **1** in  $\text{CD}_3\text{OD}$

**Figure S1-6** NOESY Spectrum of **1** in  $\text{CD}_3\text{OD}$

**Figure S1-7**  $^1\text{H}$  NMR Spectrum of *R*-MPA ester of **1** (**1a**) in  $\text{CDCl}_3$  (400 MHz)

**Figure S1-8**  $^1\text{H}$  NMR Spectrum of *S*-MPA ester of **1** (**1b**) in  $\text{CDCl}_3$  (400 MHz)

**Figure S1-9** IR Spectrum of **1**

**Figure S2-1**  $^1\text{H}$  NMR Spectrum of **2** in  $\text{CD}_3\text{OD}$  (400 MHz)

**Figure S2-2**  $^{13}\text{C}$  Spectrum of **2** in  $\text{CD}_3\text{OD}$  (100 MHz)

**Figure S2-3** HSQC Spectrum of **2** in  $\text{CD}_3\text{OD}$

**Figure S2-4** COSY Spectrum of **2** in  $\text{CD}_3\text{OD}$

**Figure S2-5** HMBC Spectrum of **2** in  $\text{CD}_3\text{OD}$

**Figure S2-6** NOESY Spectrum of **2** in  $\text{CD}_3\text{OD}$

**Figure S3-1**  $^1\text{H}$  NMR Spectrum of **3** in  $\text{CD}_3\text{OD}$  (400 MHz)

**Figure S3-2**  $^{13}\text{C}$  Spectrum of **3** in  $\text{CD}_3\text{OD}$  (100 MHz)

**Figure S3-3** HSQC Spectrum of **3** in  $\text{CD}_3\text{OD}$

**Figure S3-4** COSY Spectrum of **3** in  $\text{CD}_3\text{OD}$

**Figure S3-5** HMBC Spectrum of **3** in  $\text{CD}_3\text{OD}$

**Figure S3-6** NOESY Spectrum of **3** in  $\text{CD}_3\text{OD}$

**Figure S4-1**  $^1\text{H}$  NMR Spectrum of **4** in  $\text{CD}_3\text{OD}$  (400 MHz)

**Figure S4-2**  $^{13}\text{C}$  Spectrum of **4** in  $\text{CD}_3\text{OD}$  (100 MHz)

**Figure S4-3** HSQC Spectrum of **4** in  $\text{CD}_3\text{OD}$

**Figure S4-4** COSY Spectrum of **4** in  $\text{CD}_3\text{OD}$

**Figure S4-5** HMBC Spectrum of **4** in  $\text{CD}_3\text{OD}$

**Figure S4-6** NOESY Spectrum of **4** in  $\text{CD}_3\text{OD}$

**Figure S5-1**  $^1\text{H}$  NMR Spectrum of **5** in  $\text{CDCl}_3$  (400 MHz)

**Figure S5-2**  $^{13}\text{C}$  Spectrum of **5** in  $\text{CDCl}_3$  (100 MHz)

**Figure S5-3** HSQC Spectrum of **5** in  $\text{CDCl}_3$

**Figure S5-4** COSY Spectrum of **5** in  $\text{CDCl}_3$

**Figure S5-5** HMBC Spectrum of **5** in  $\text{CDCl}_3$

**Figure S5-6** NOESY Spectrum of **5** in  $\text{CDCl}_3$

**Figure S6-1**  $^1\text{H}$  NMR Spectrum of **6** in  $\text{CD}_3\text{OD}$  (400 MHz)

**Figure S6-2**  $^{13}\text{C}$  Spectrum of **6** in  $\text{CD}_3\text{OD}$  (100 MHz)

**Figure S7-1**  $^1\text{H}$  NMR Spectrum of **7** in  $\text{CD}_3\text{OD}$  (400 MHz)

**Figure S7-2**  $^{13}\text{C}$  Spectrum of **7** in  $\text{CD}_3\text{OD}$  (100 MHz)

**Figure S8-1** Comparison of  $^1\text{H}$  NMR Spectra of **7** and hydrolysis product of **8**  
( $\text{CD}_3\text{OD}$ , 400 MHz)

**Figure S8-2** Comparison of  $^{13}\text{C}$  NMR Spectra of **7** and hydrolysis product of **8**  
( $\text{CD}_3\text{OD}$ , 100 MHz)

**Table S1.**  $^1\text{H}$  (400 MHz) and  $^{13}\text{C}$  (100 MHz) NMR Data for **7** in  $\text{CD}_3\text{OD}$

TF-24-2-1-1 1H NMR CD3OD 400 MHz

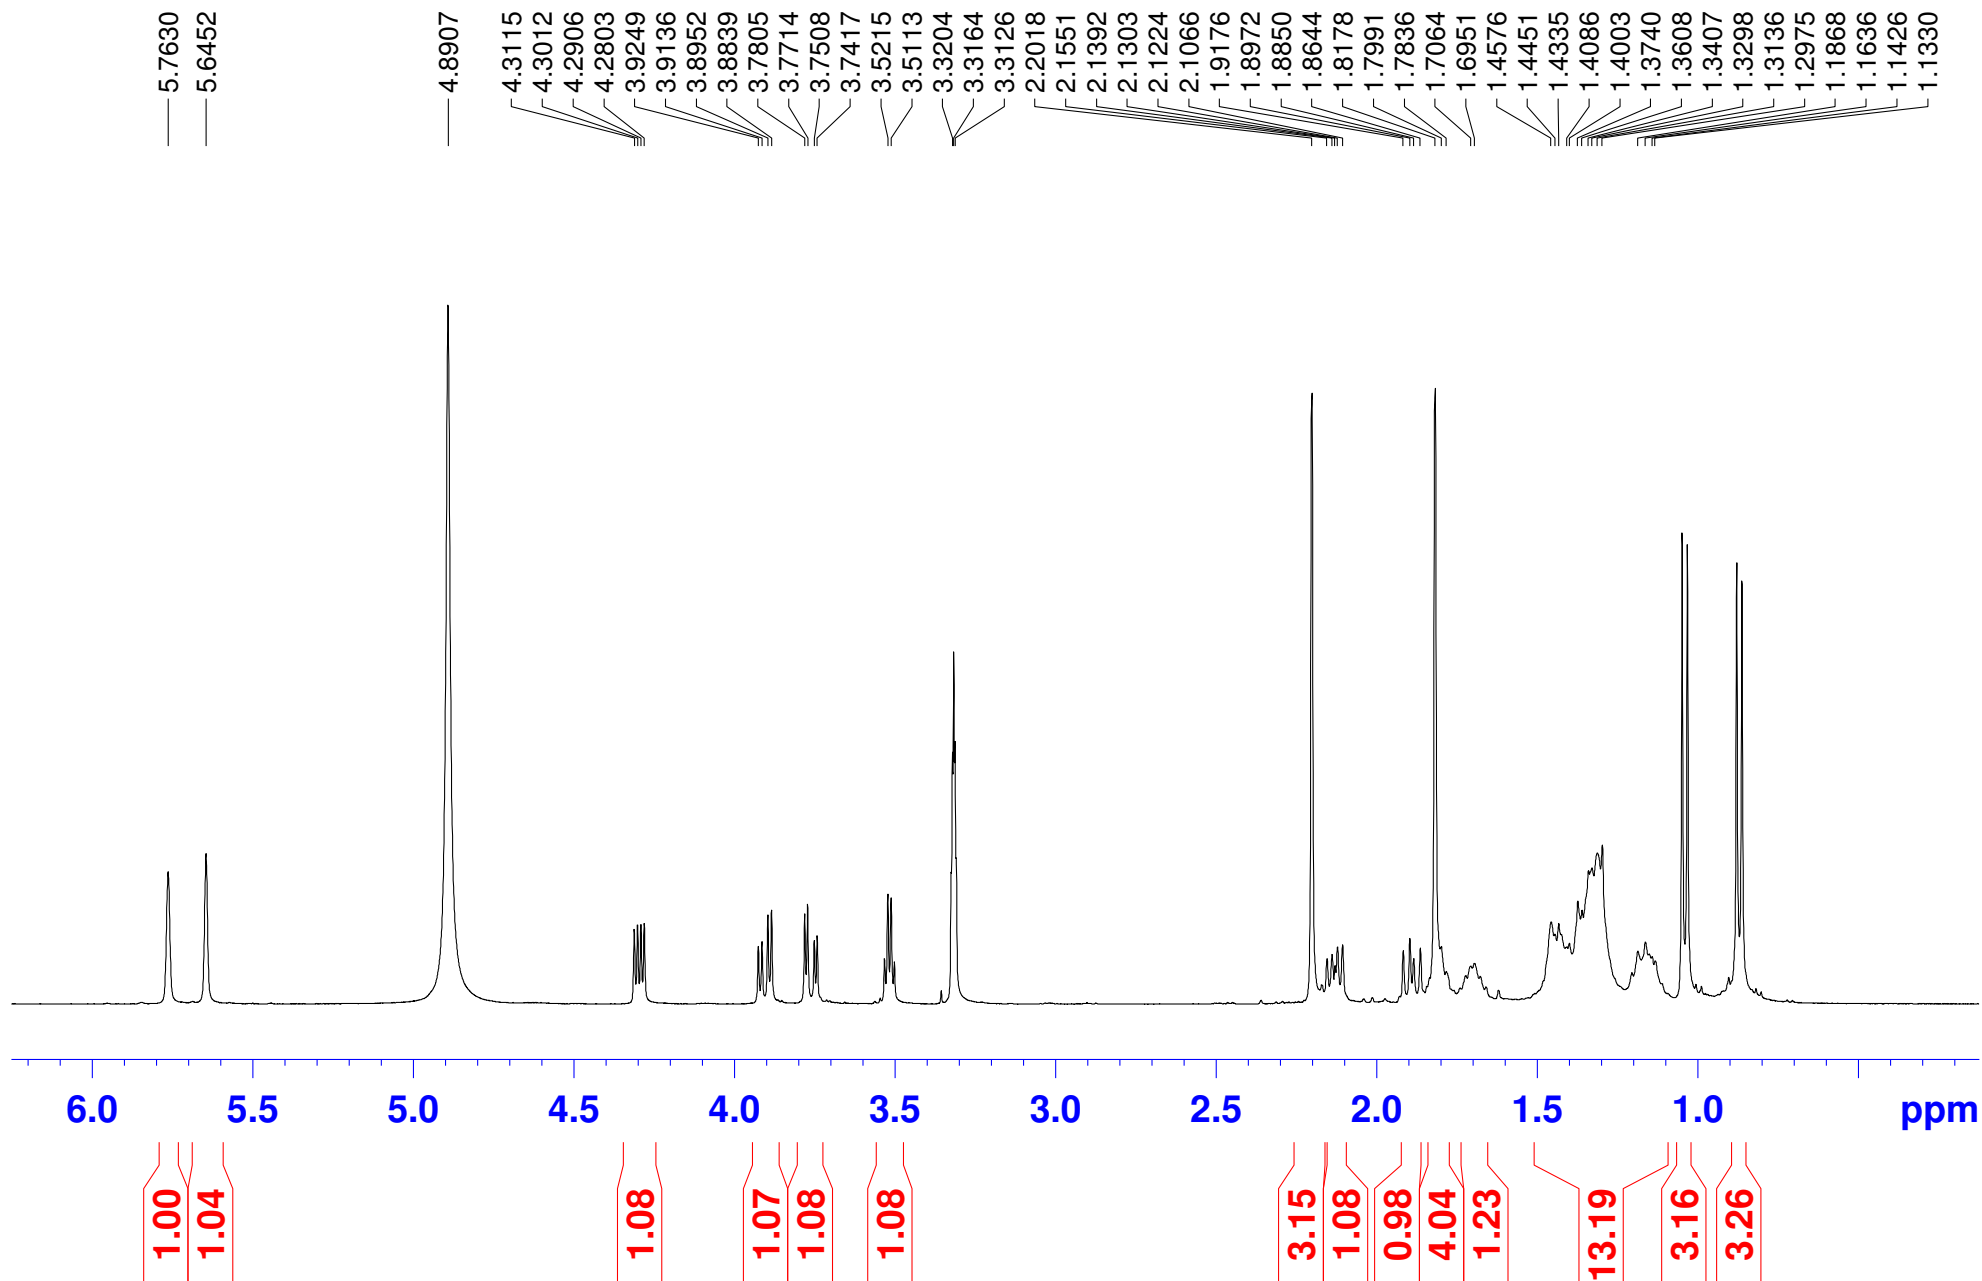

Figure S1-1 <sup>1</sup>H NMR Spectrum of 1 in CD<sub>3</sub>OD (400 MHz)

TF-24-2-1-1 <sup>13</sup>C NMR CD<sub>3</sub>OD 100 MHz

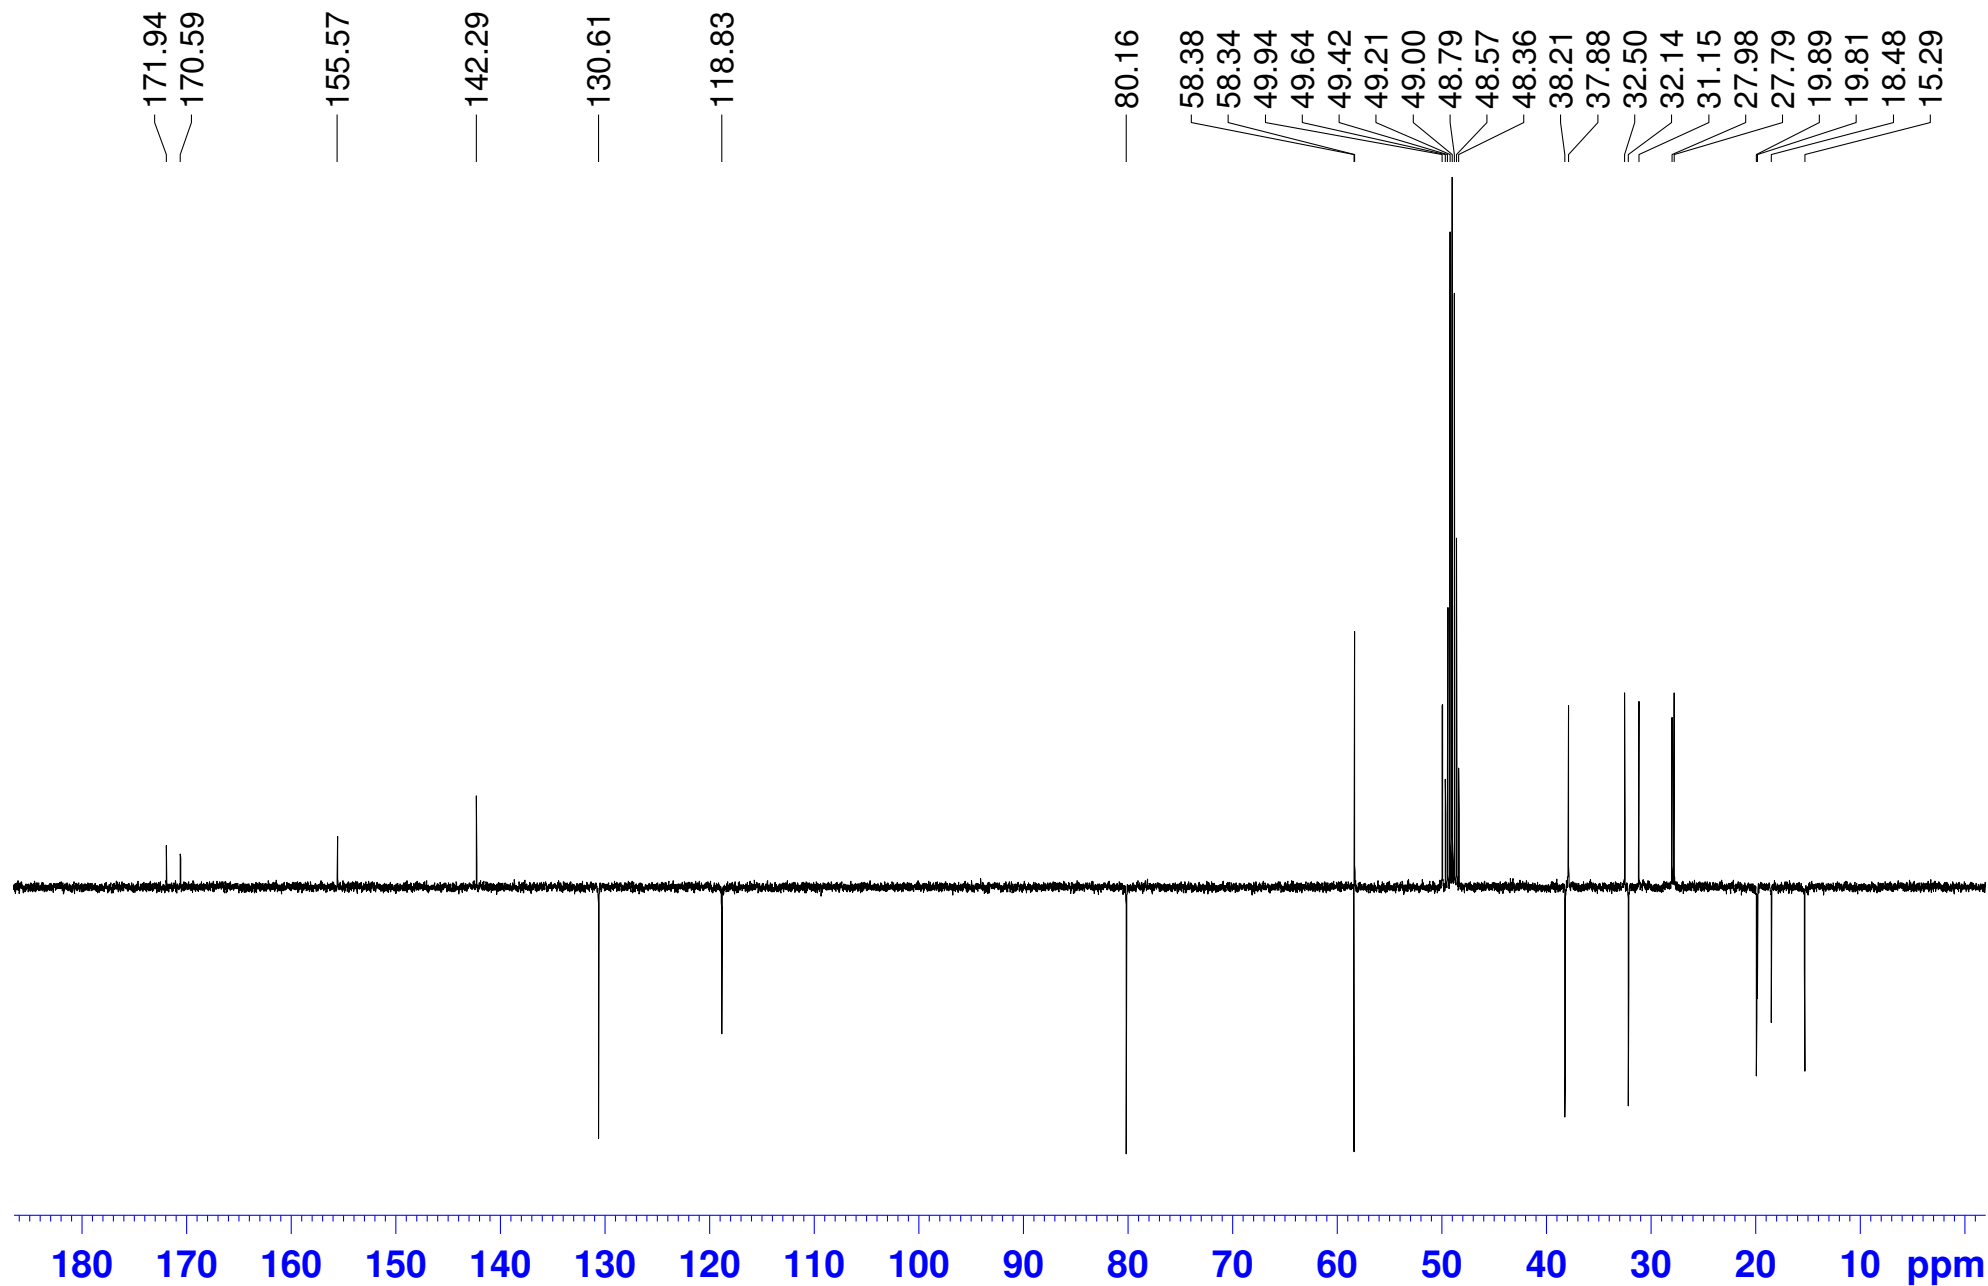

Figure S1-2 <sup>13</sup>C Spectrum of 1 in CD<sub>3</sub>OD (100 MHz)

TF-24-2-1 HSQC CD3OD

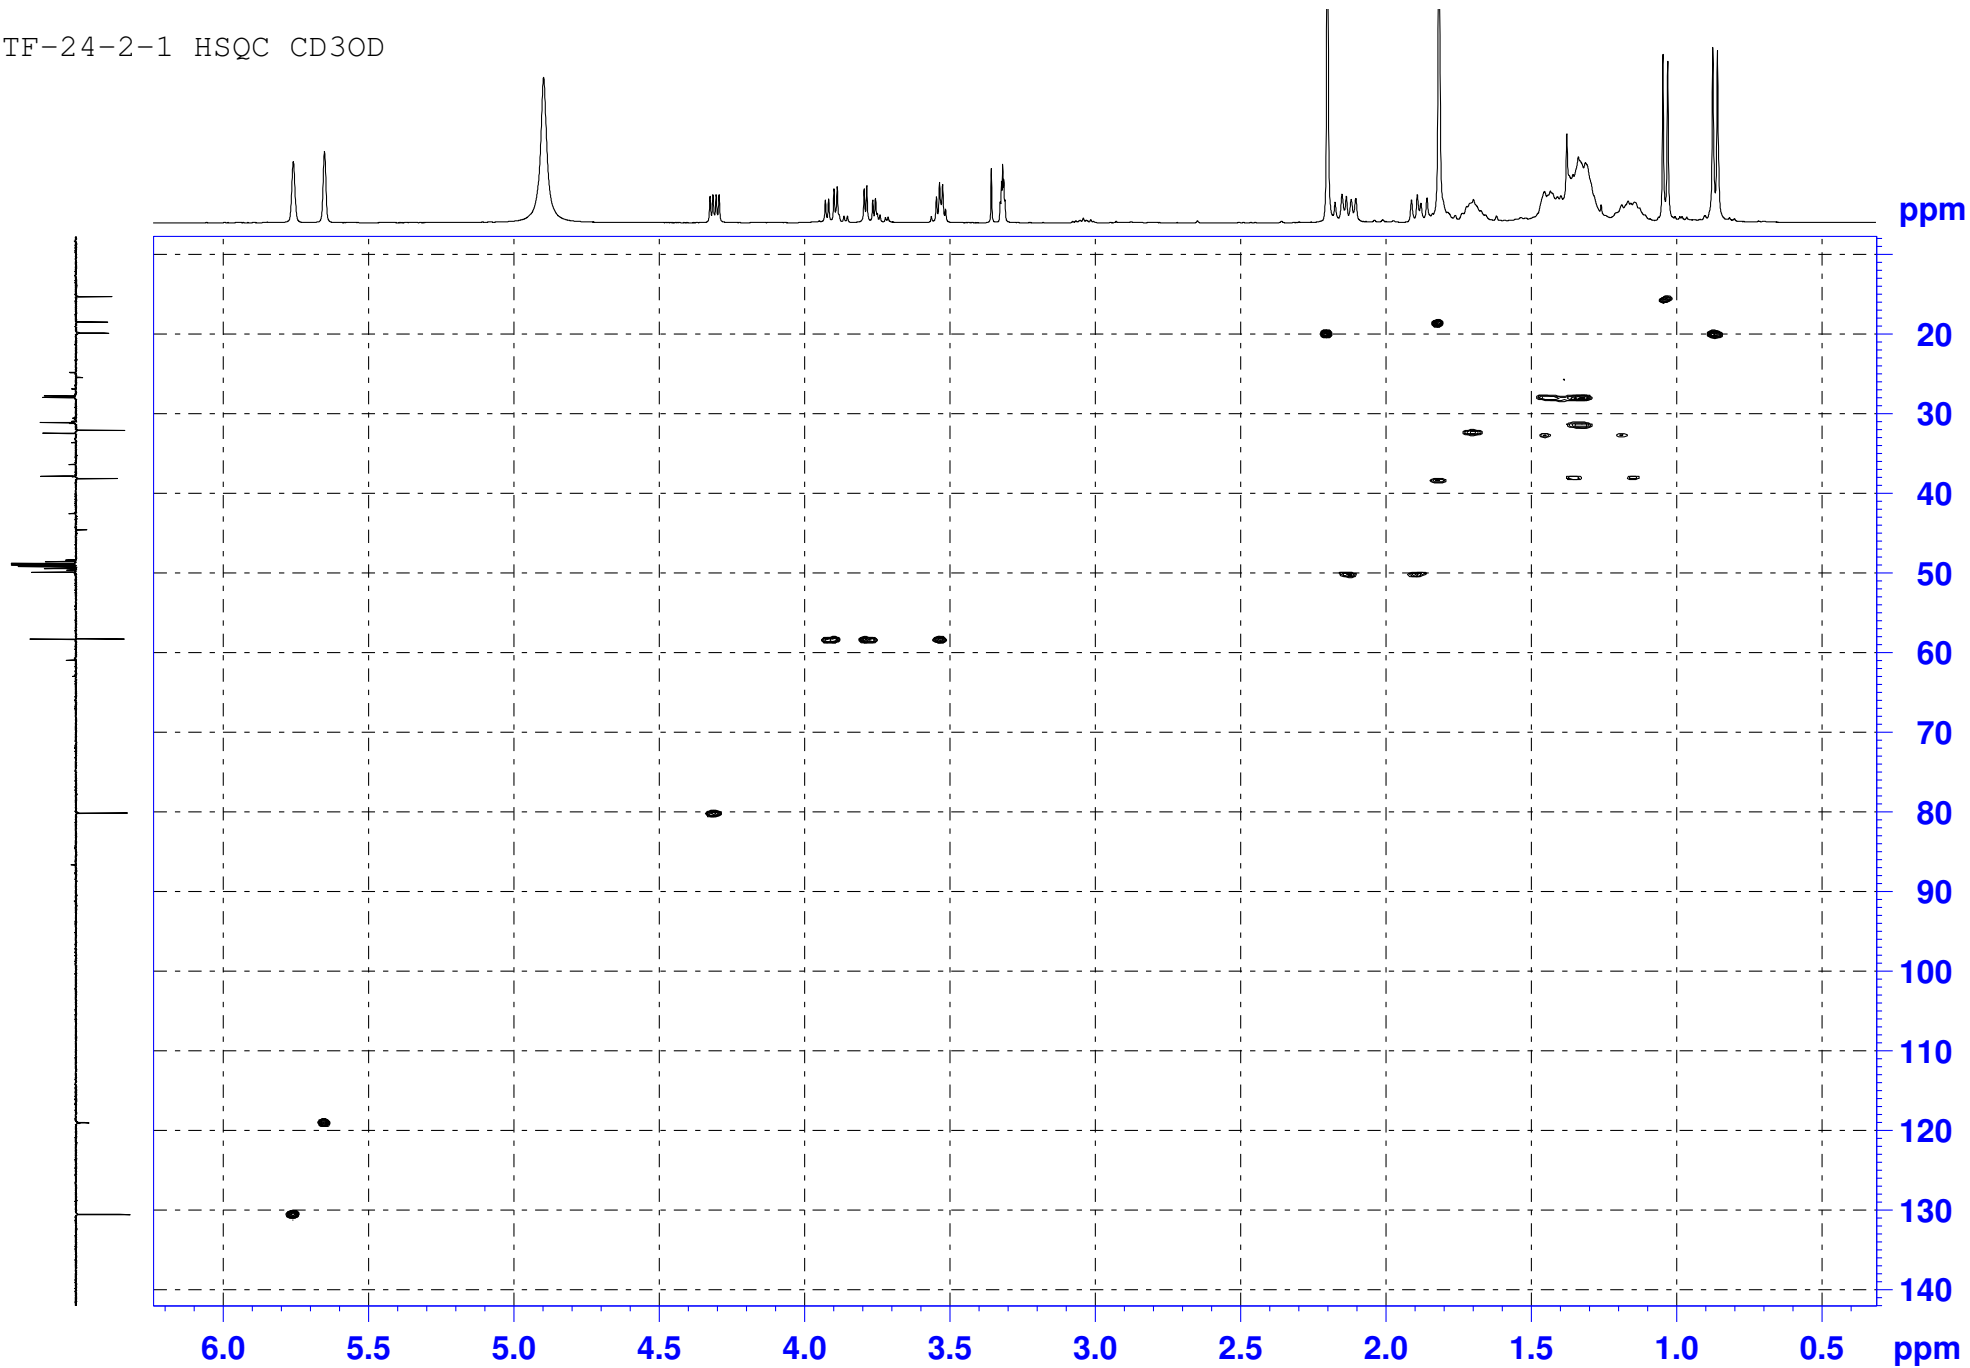

Figure S1-3 HSQC Spectrum of 1 in  $\text{CD}_3\text{OD}$

TF-24-2-1 COSY CD3OD

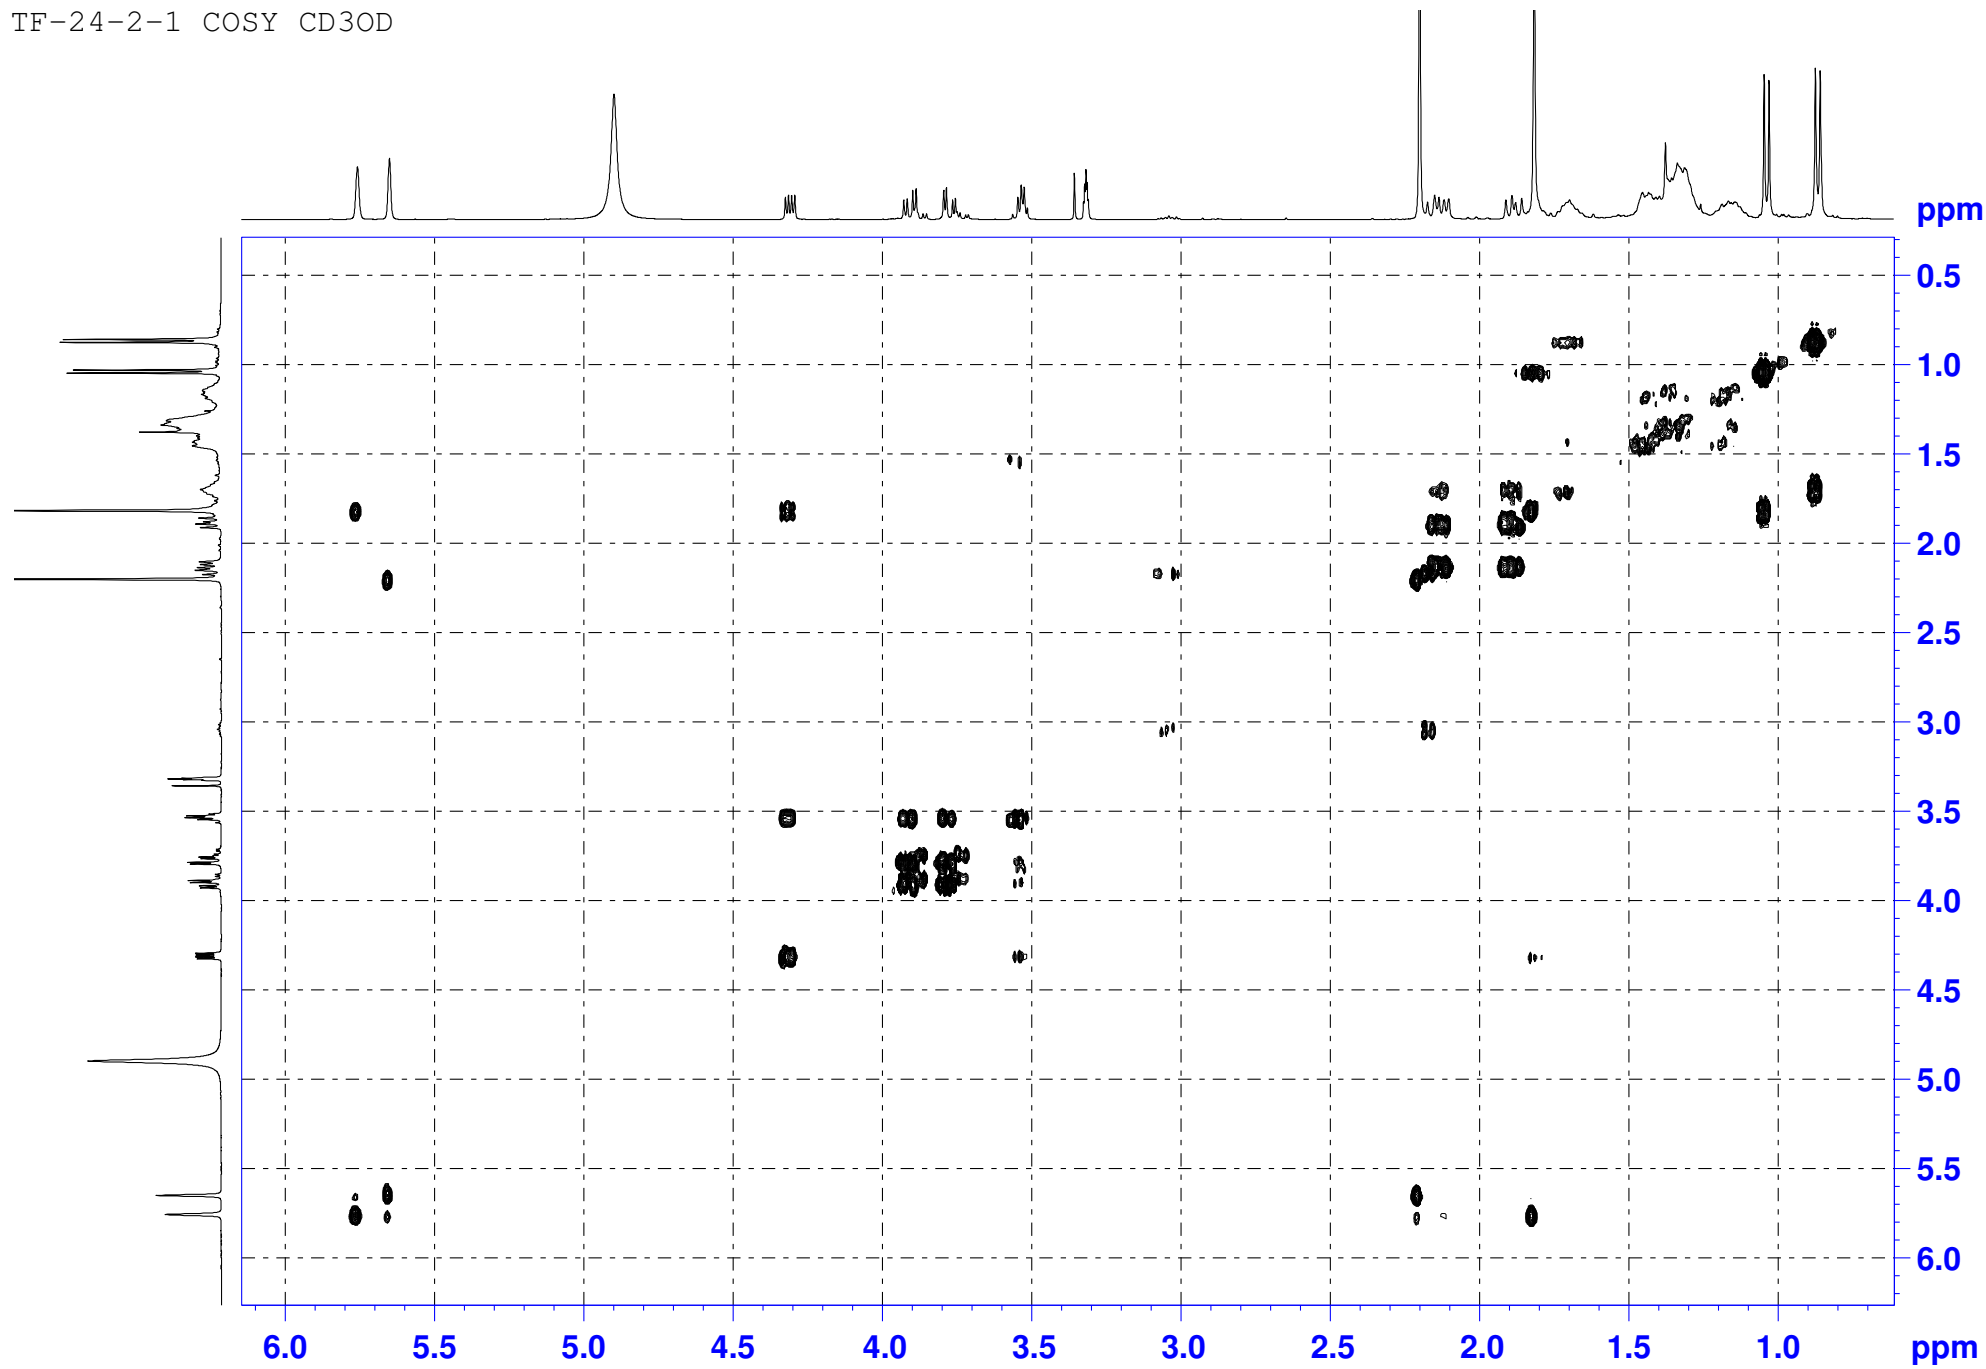

Figure S1-4 COSY Spectrum of **1** in CD<sub>3</sub>OD

TF-24-2-1 HMBC CD3OD

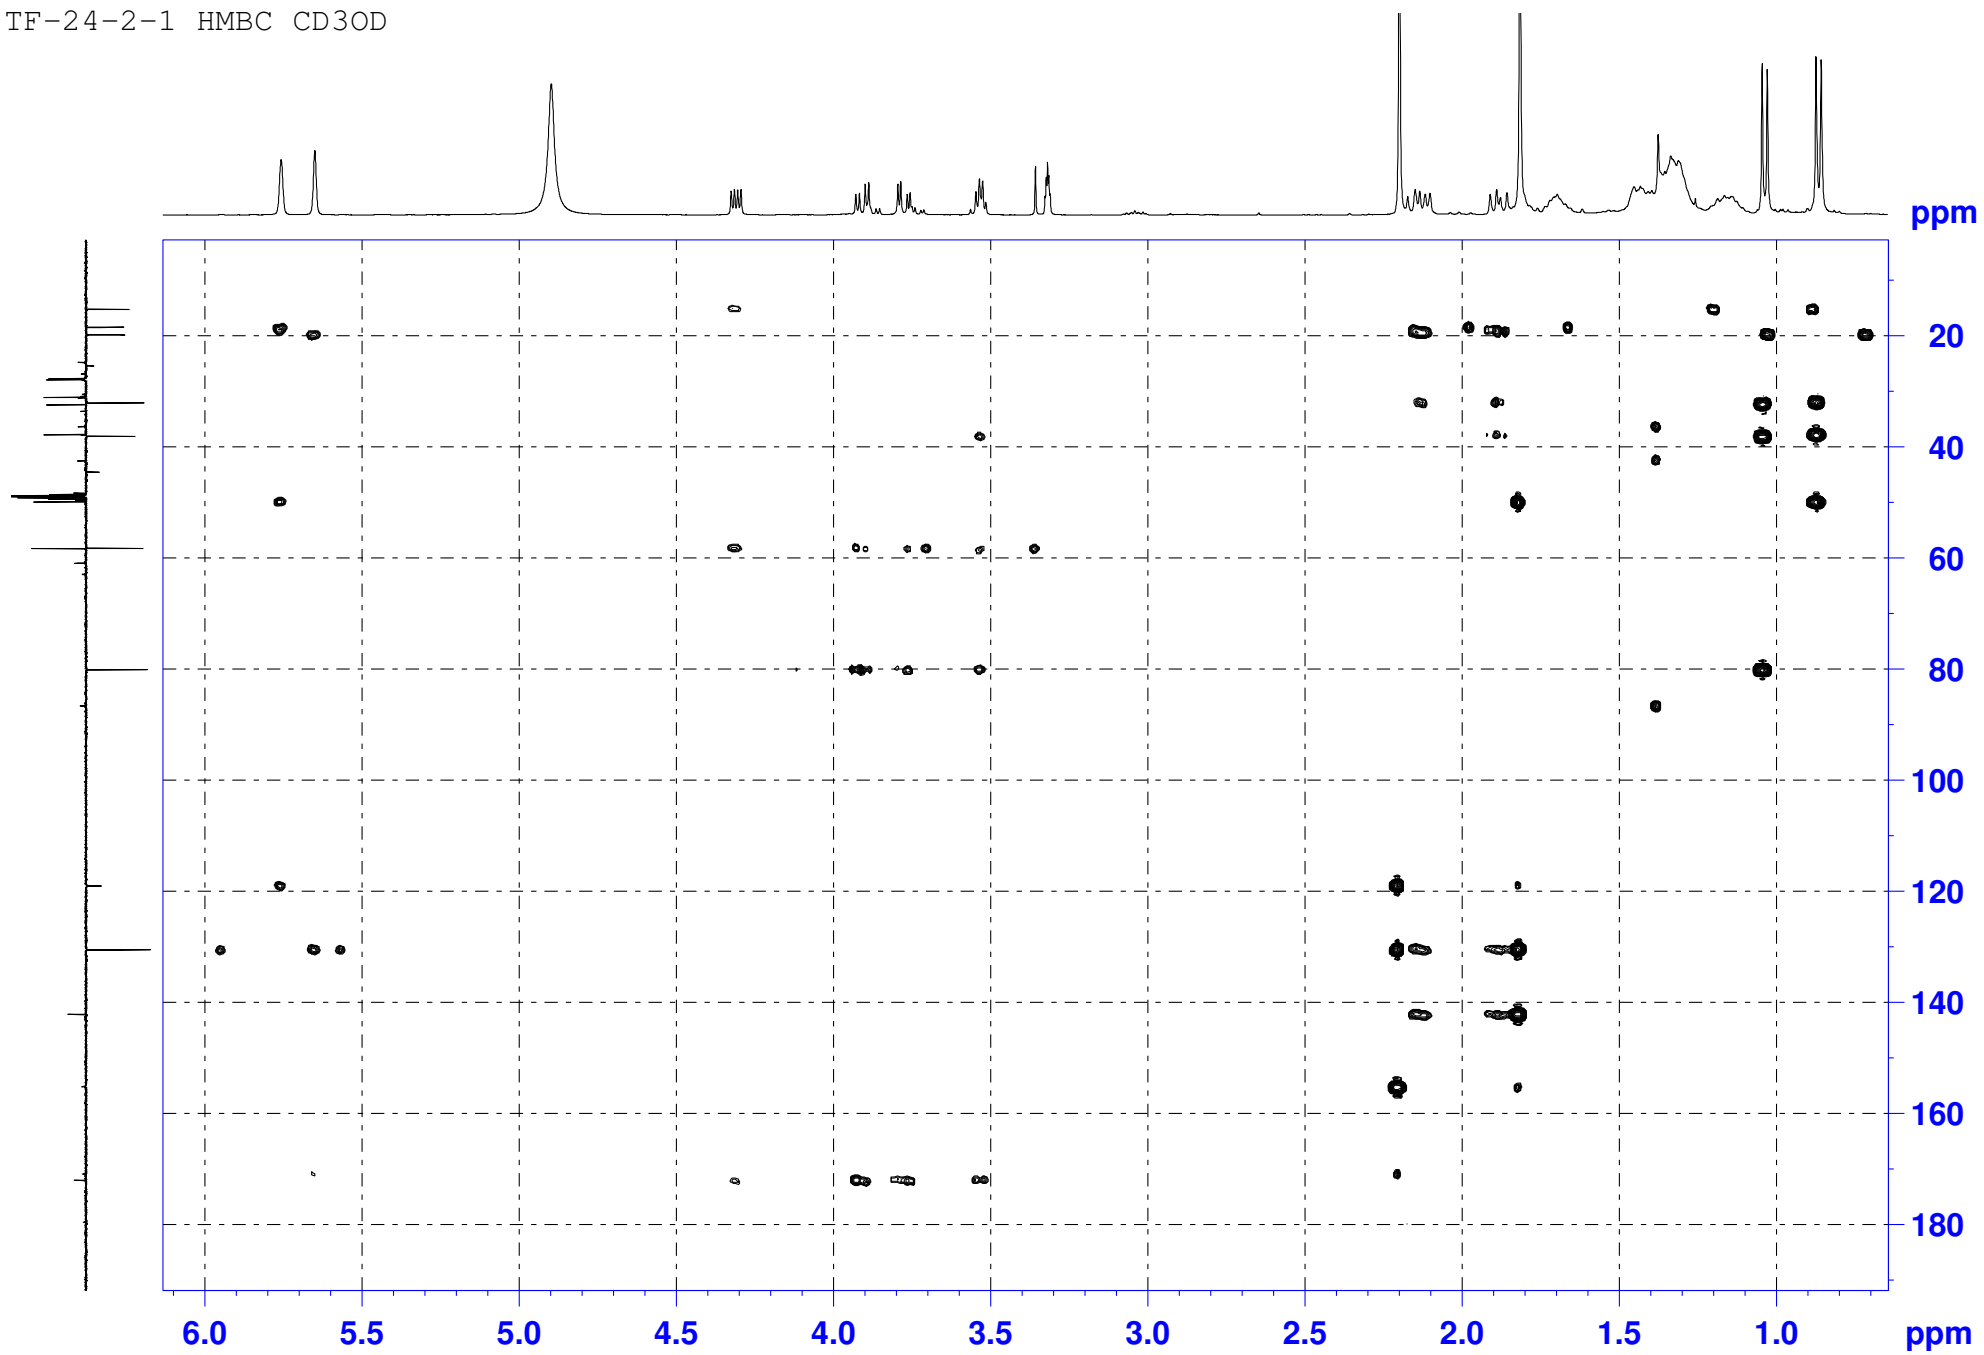

Figure S1-5 HMBC Spectrum of 1 in CD<sub>3</sub>OD



TF-24-2-1

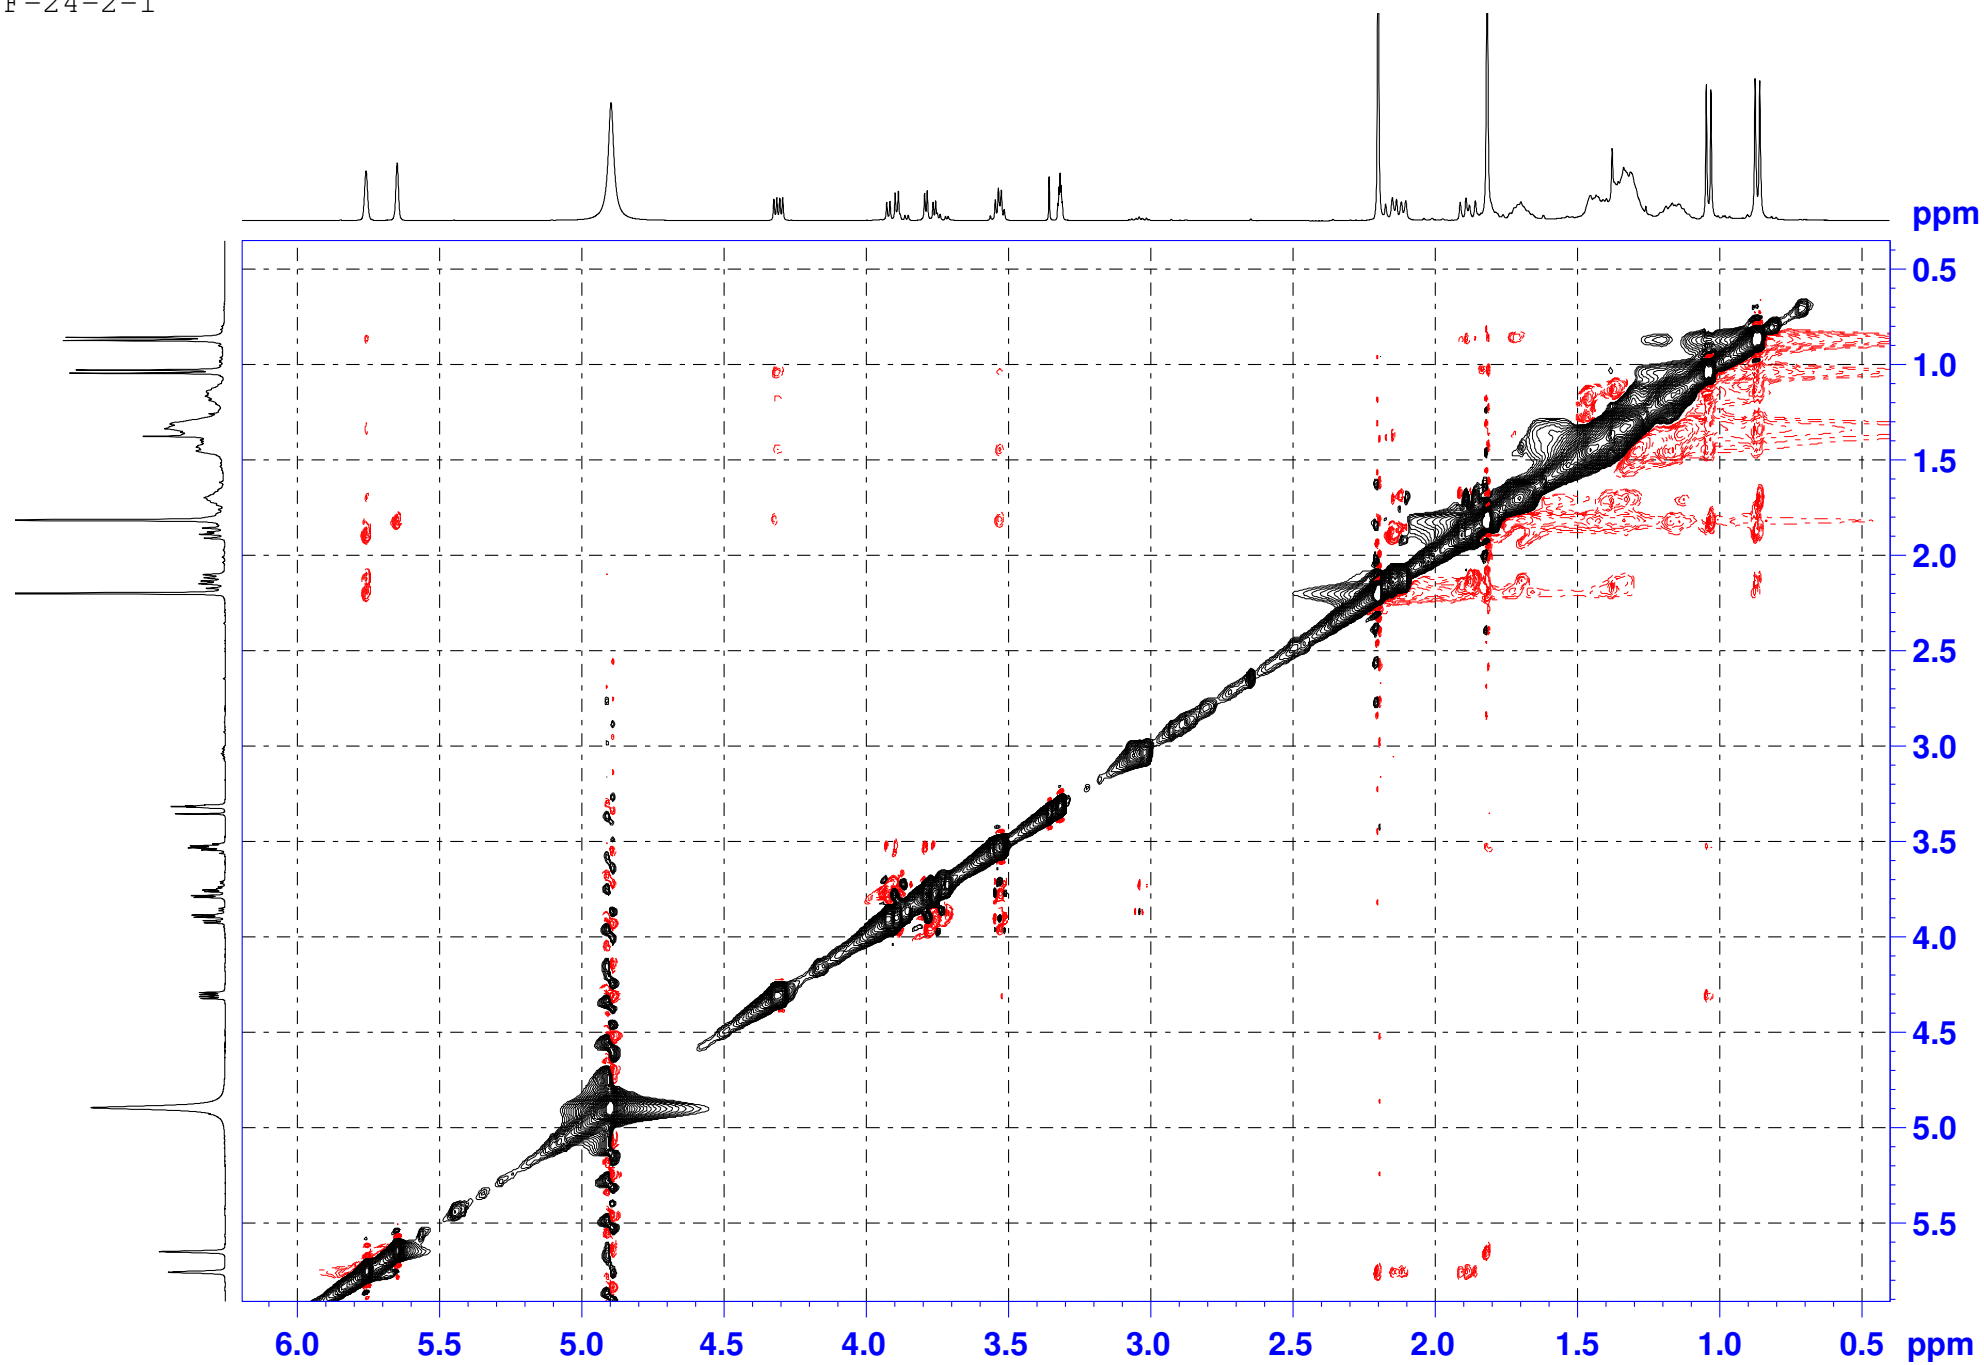

Figure S1-6 NOESY Spectrum of 1 in CD<sub>3</sub>OD

TF-24-2-1-1-R 1H NMR CDCl3 400 MHz

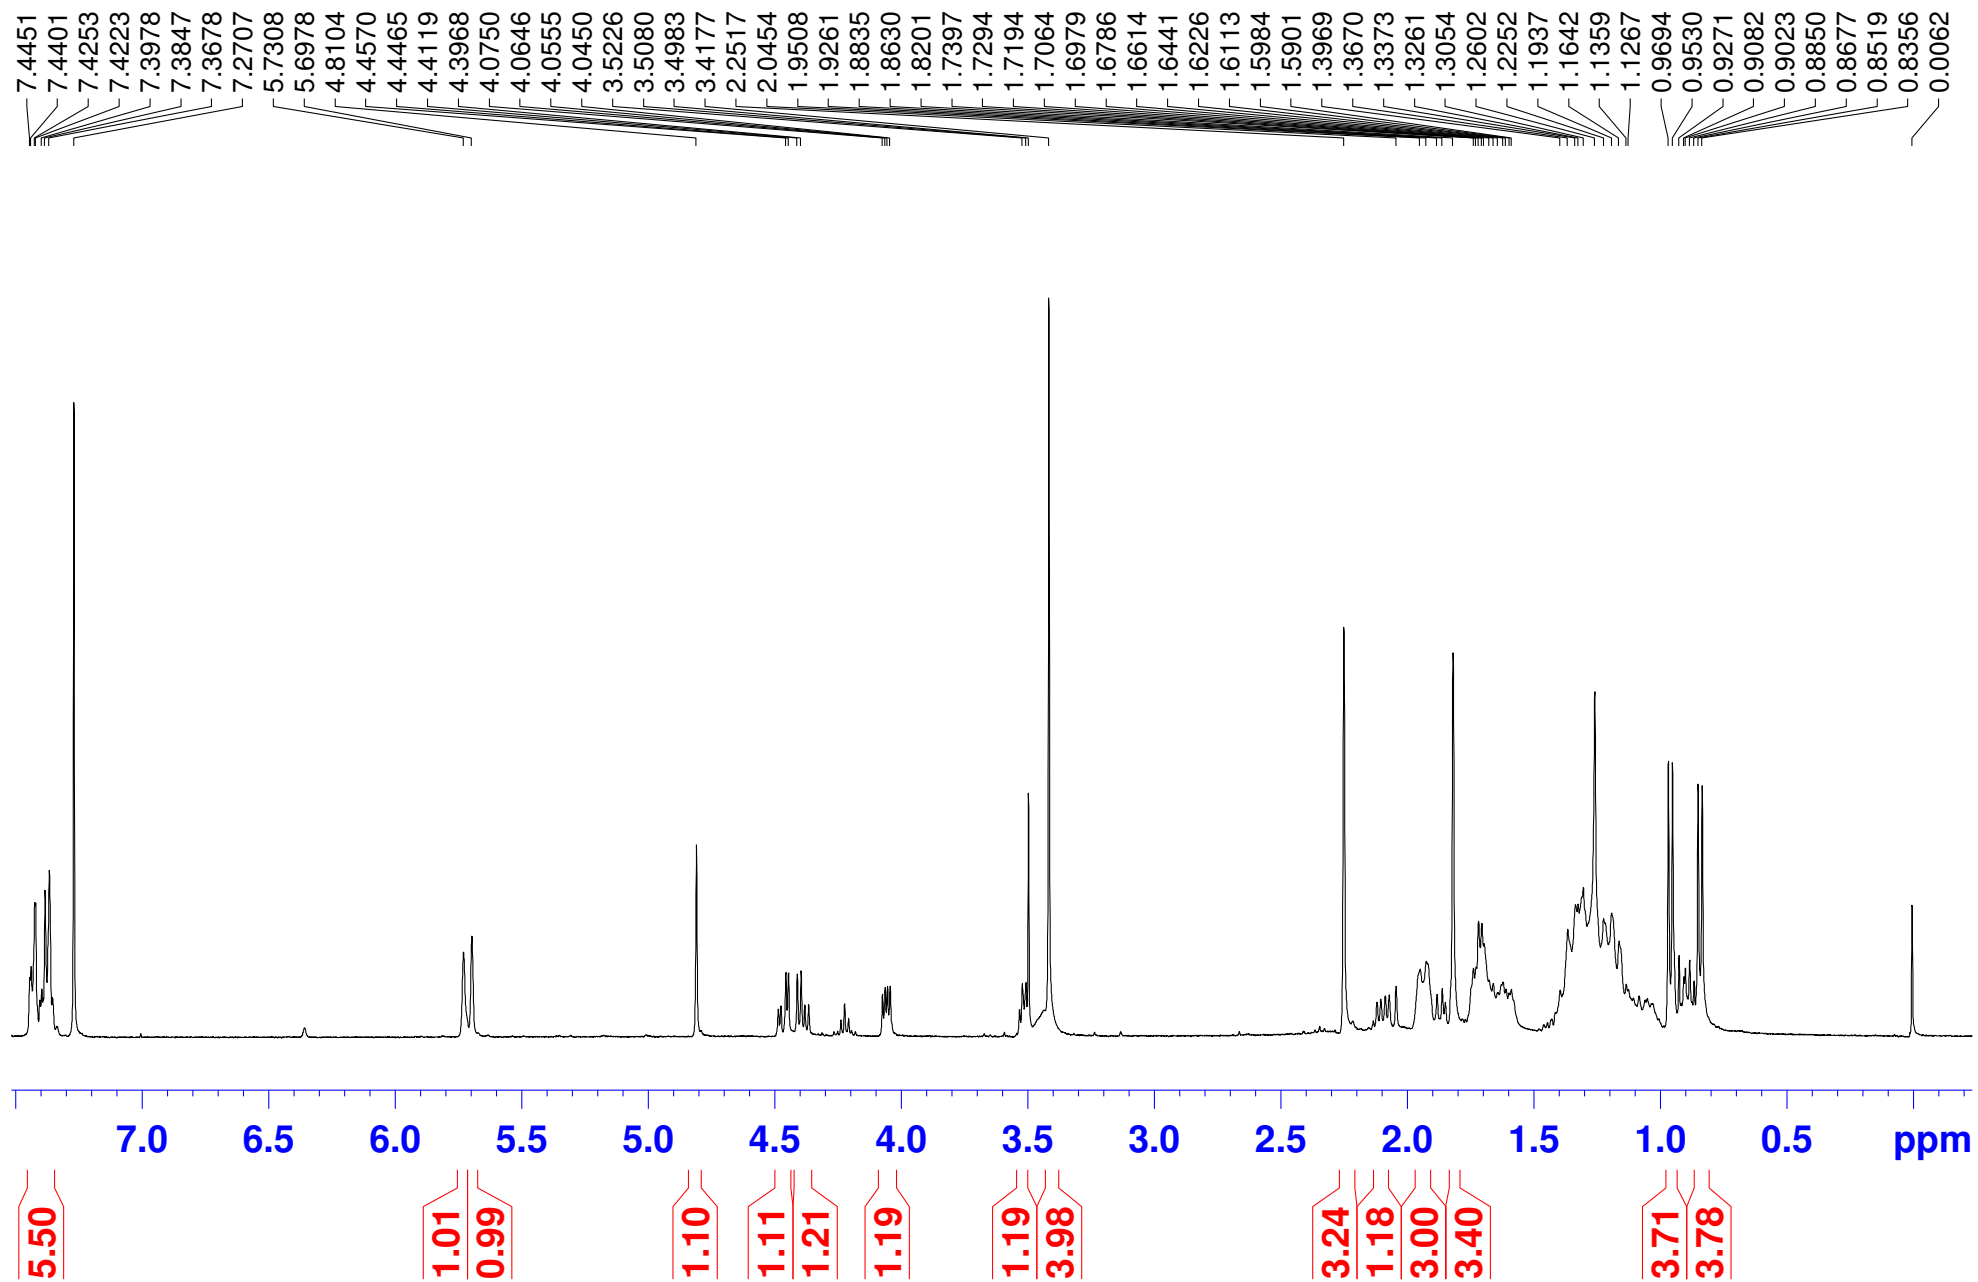

Figure S1-7 <sup>1</sup>H NMR Spectrum of R-MPA Ester of **1** (**1a**) in CDCl<sub>3</sub> (400 MHz)

TF-24-2-1-1-S 1H NMR CDCl3 400 MHz

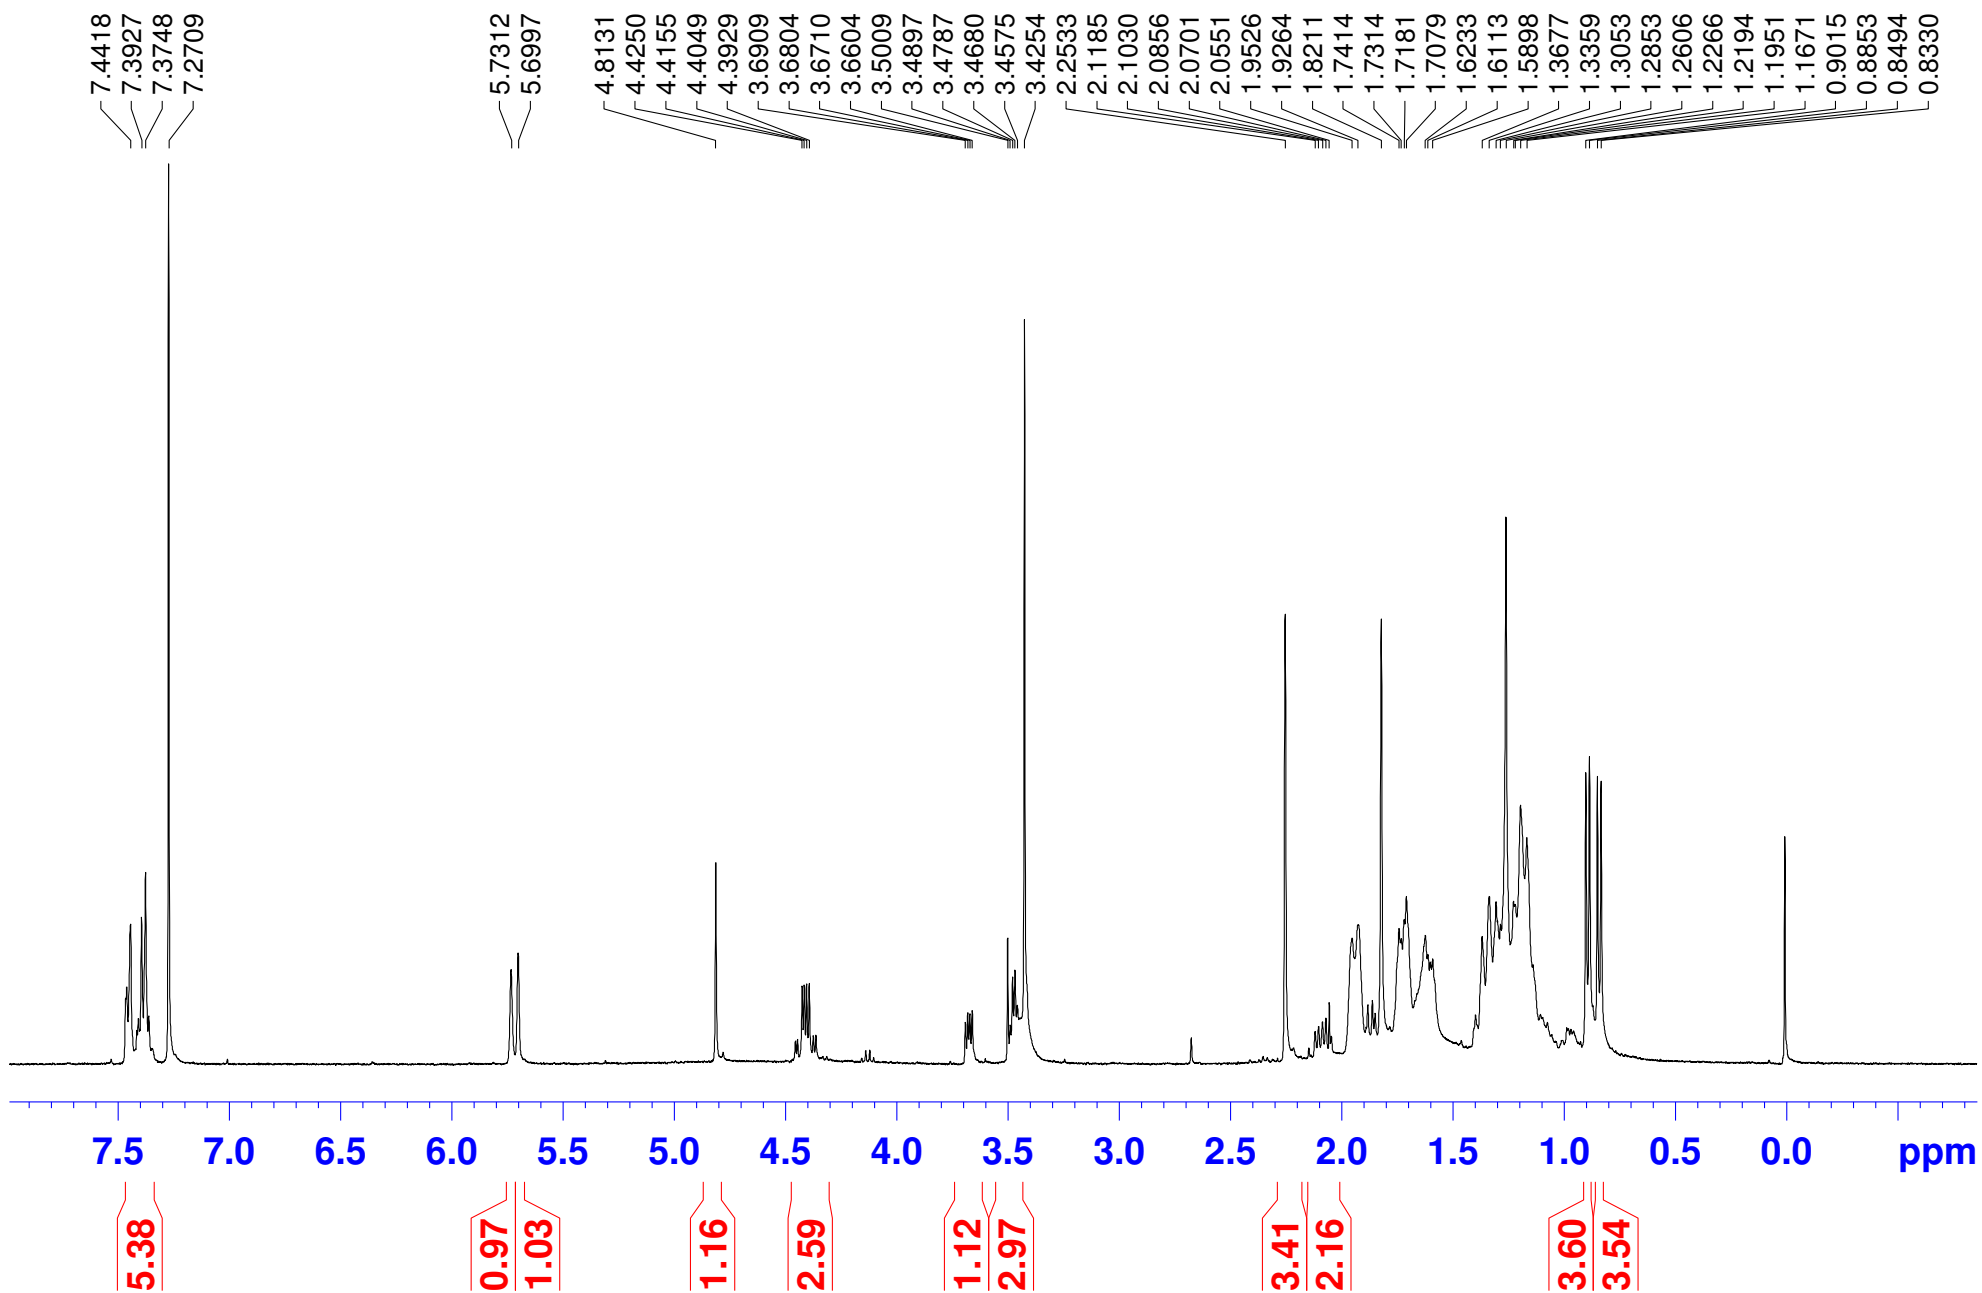

Figure S1-8 <sup>1</sup>H NMR Spectrum of S-MPA Ester of 1 (1b) in CDCl<sub>3</sub> (400 MHz)

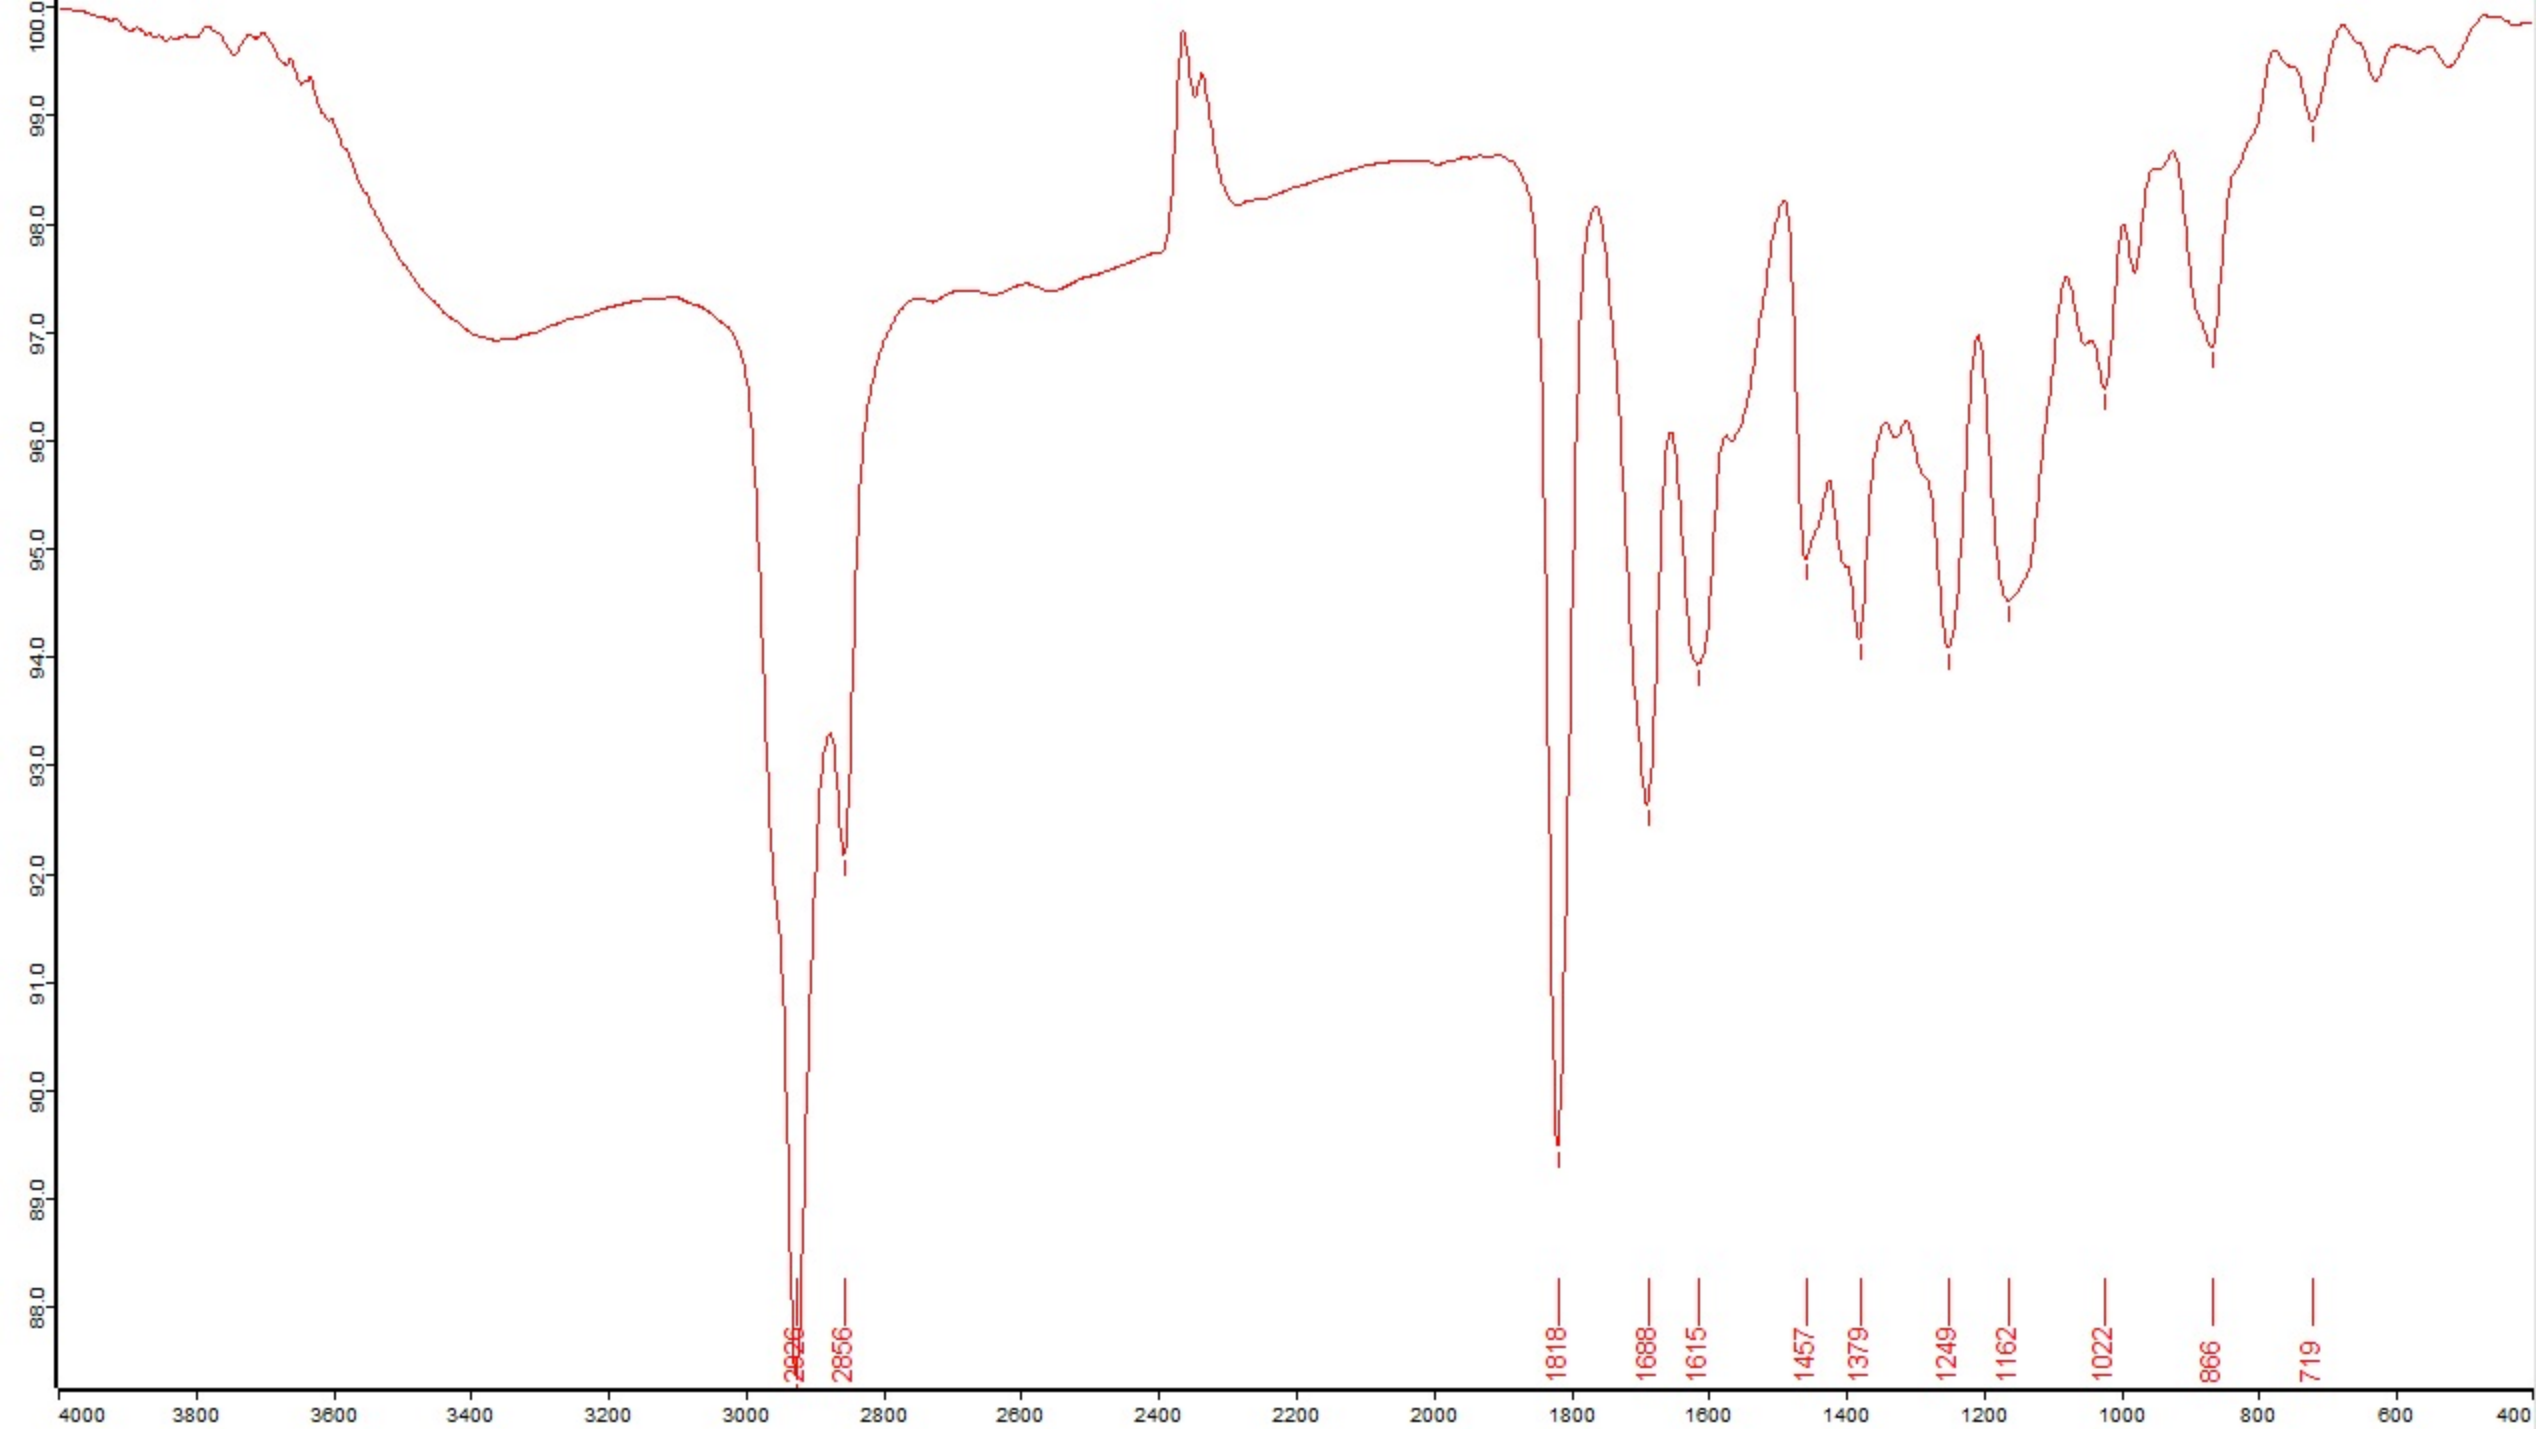

**Figure S1-9** IR Spectrum of **1**

TF-24-2-1-2 1H NMR CD3OD 400 MHz

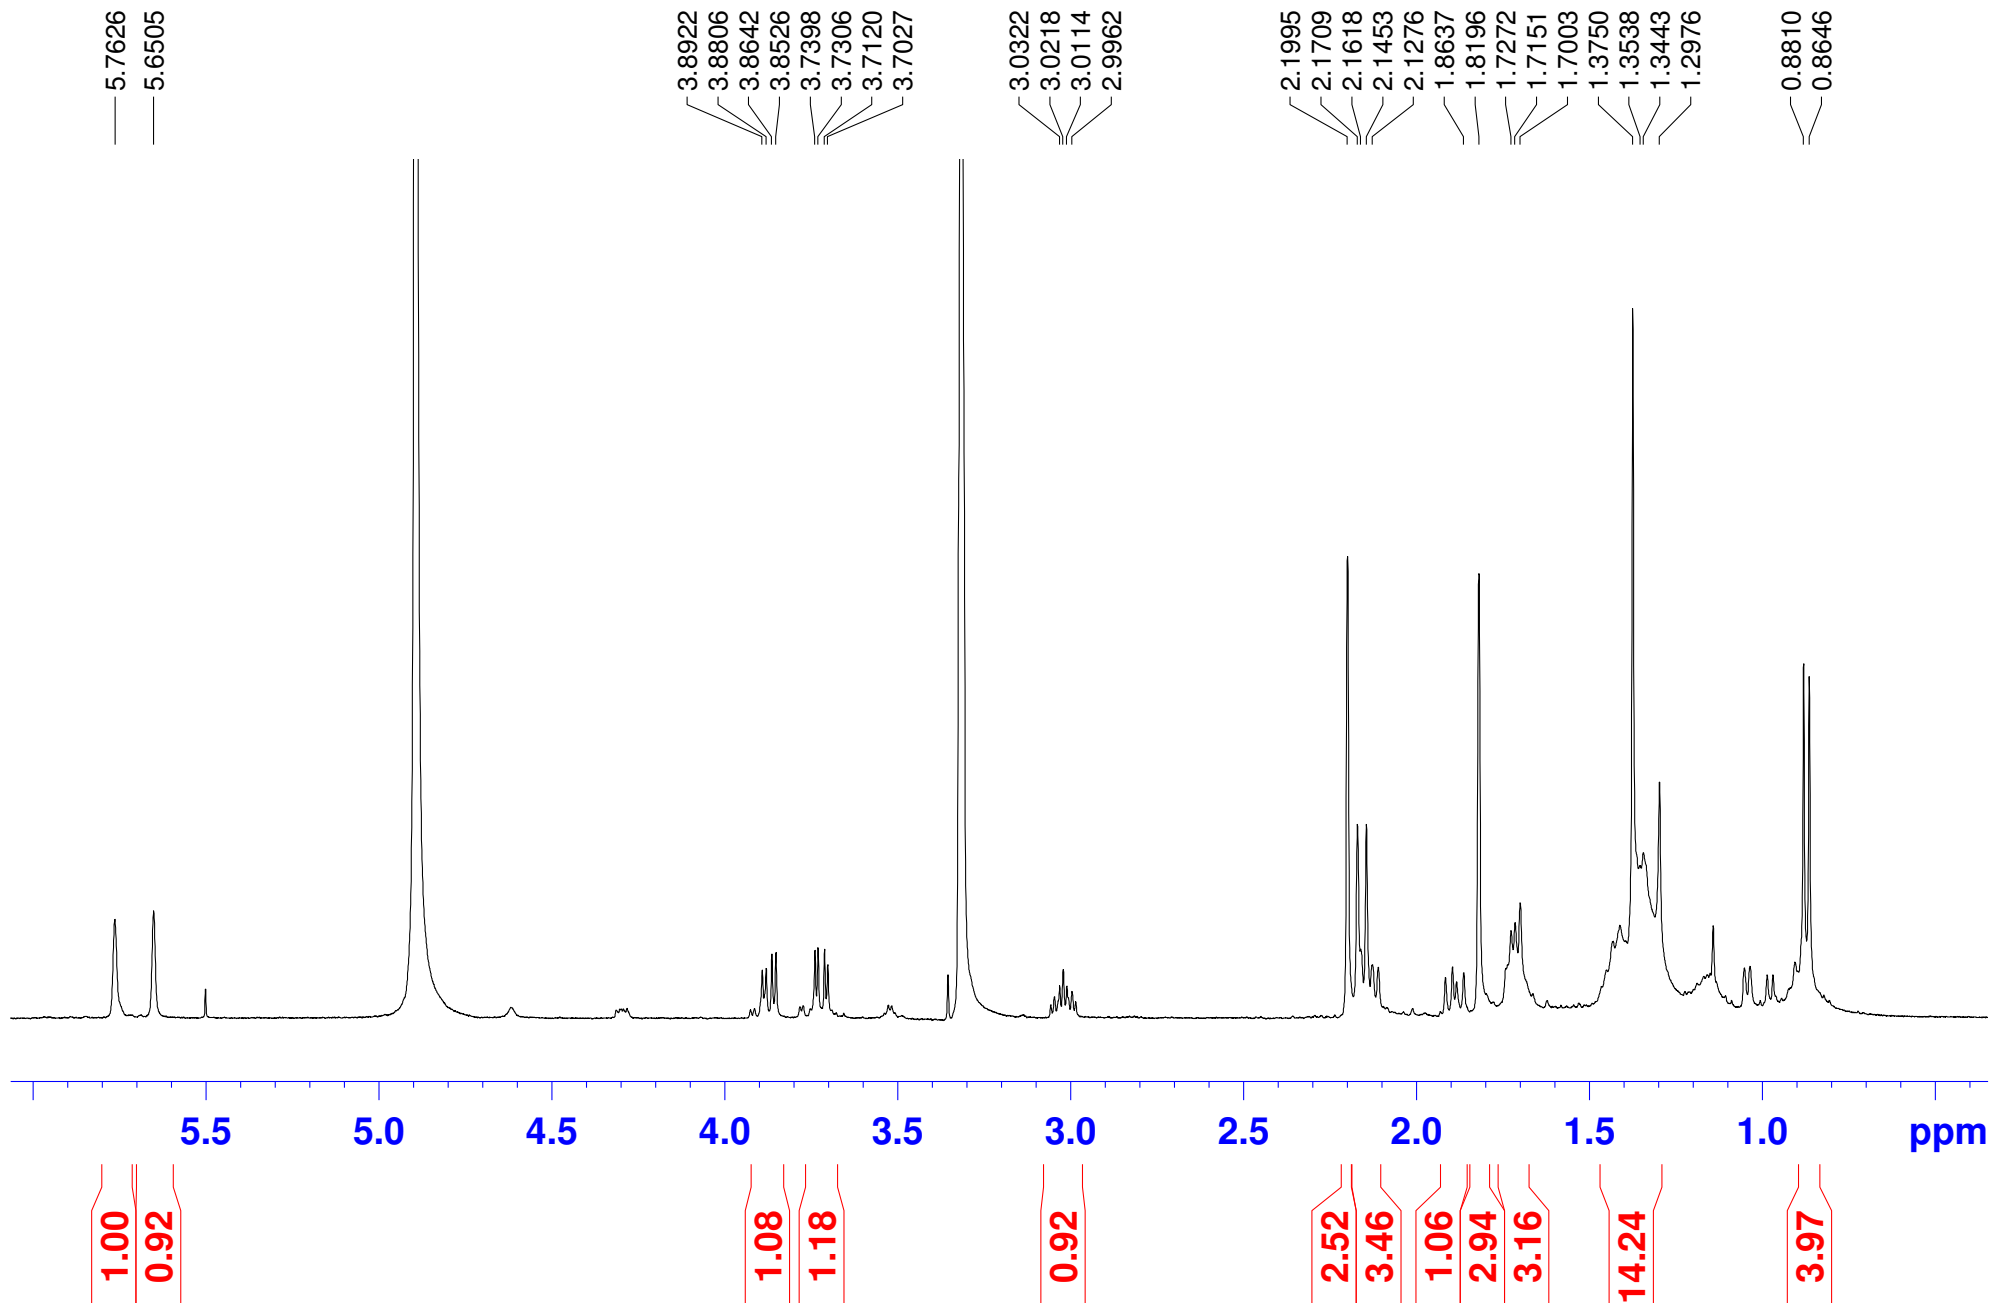

Figure S2-1 <sup>1</sup>H NMR Spectrum of **2** in CD<sub>3</sub>OD (400 MHz)

TF-24-2-1-2 <sup>13</sup>C NMR CD<sub>3</sub>OD 100 MHz

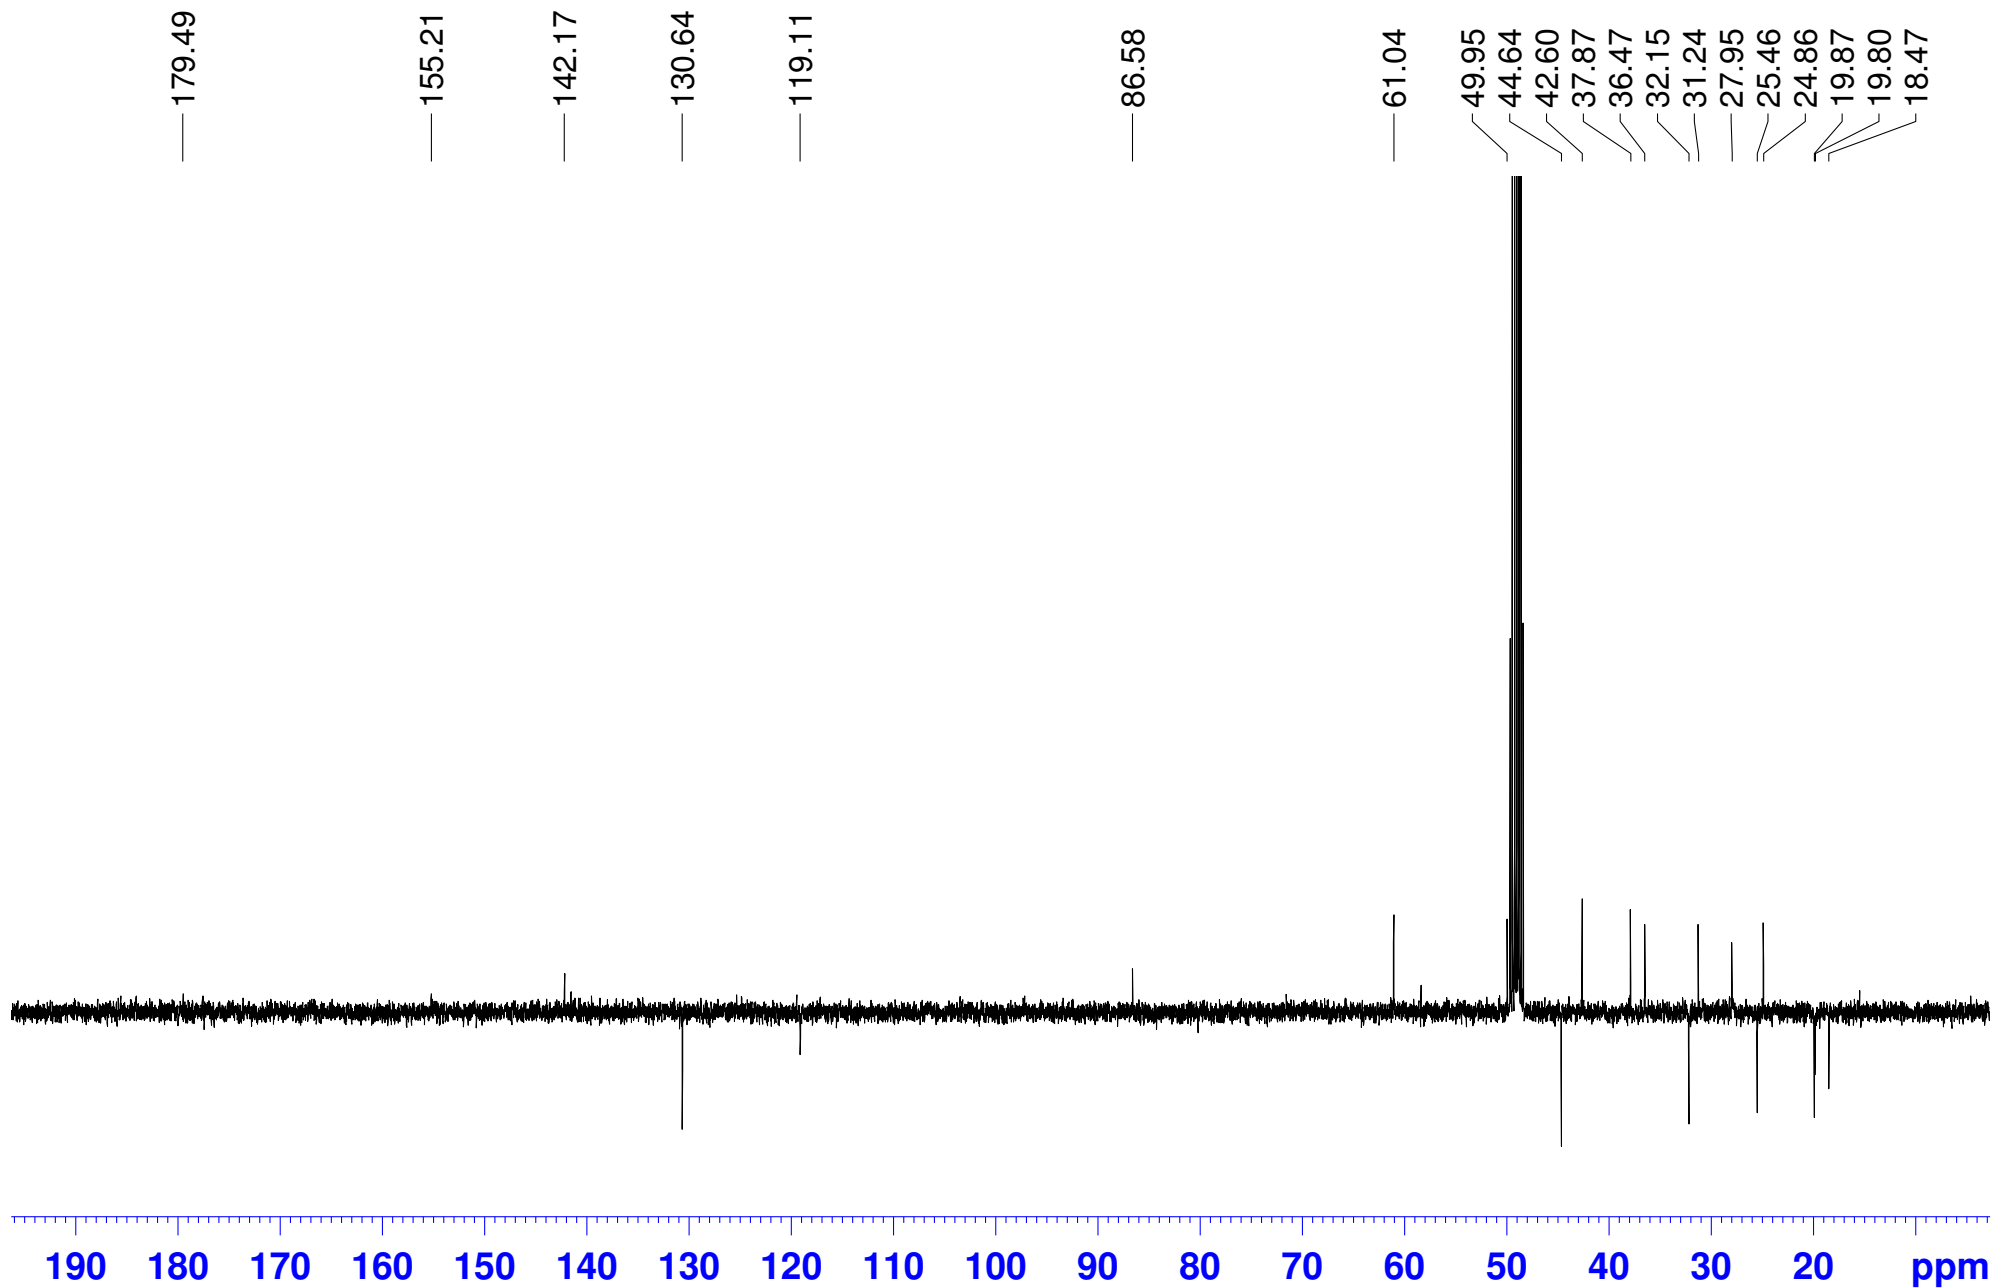

Figure S2-2 <sup>13</sup>C Spectrum of **2** in CD<sub>3</sub>OD (100 MHz)

TF-24-2-1-2 HSQC CD3OD

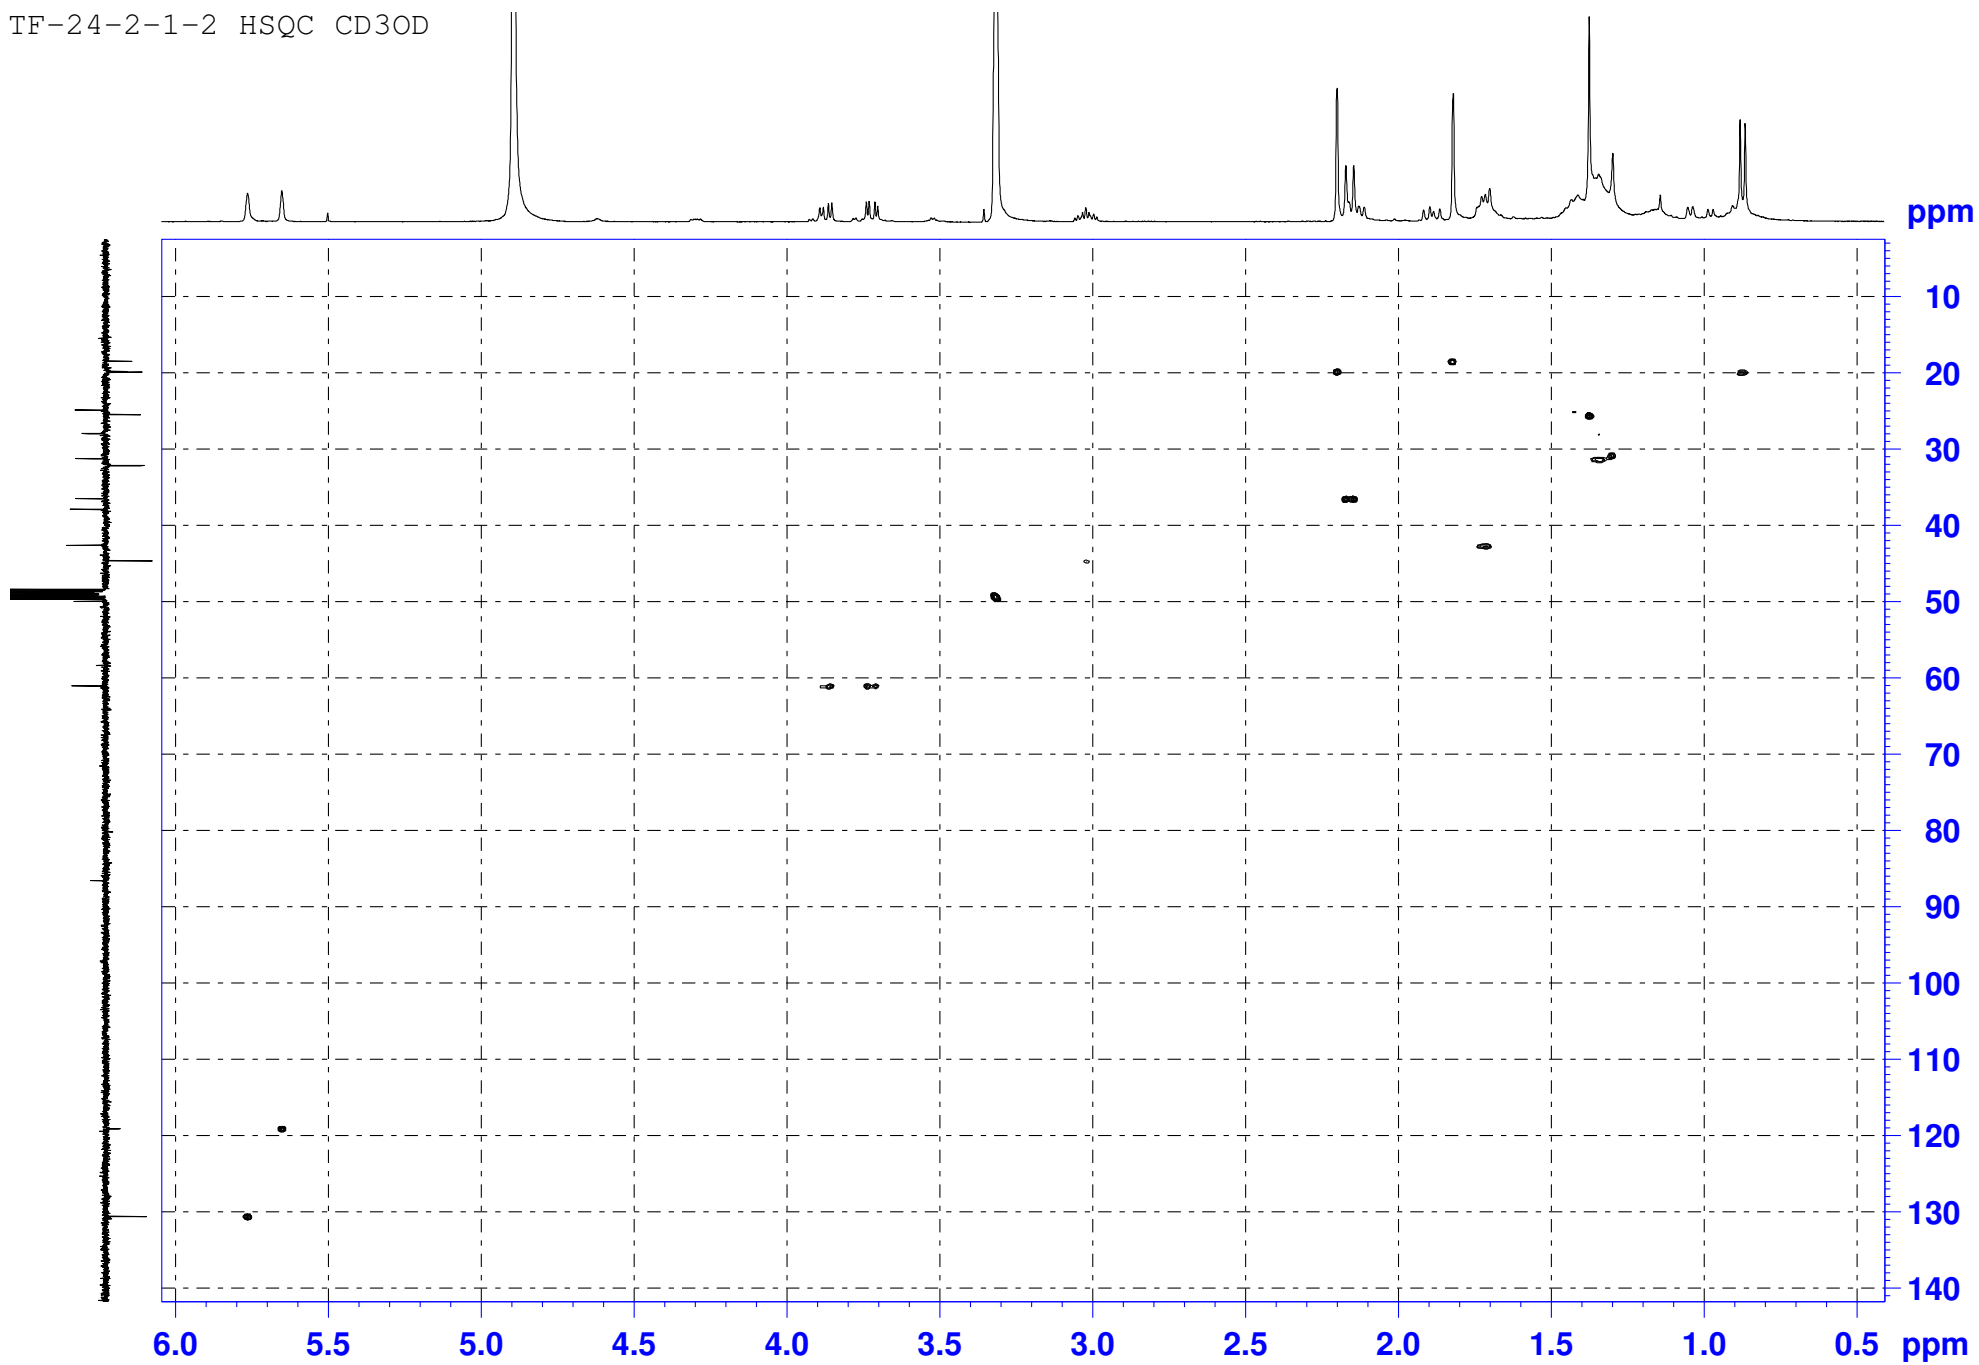

Figure S2-3 HSQC Spectrum of **2** in  $\text{CD}_3\text{OD}$

TF-24-2-1-2 COSY CD3OD

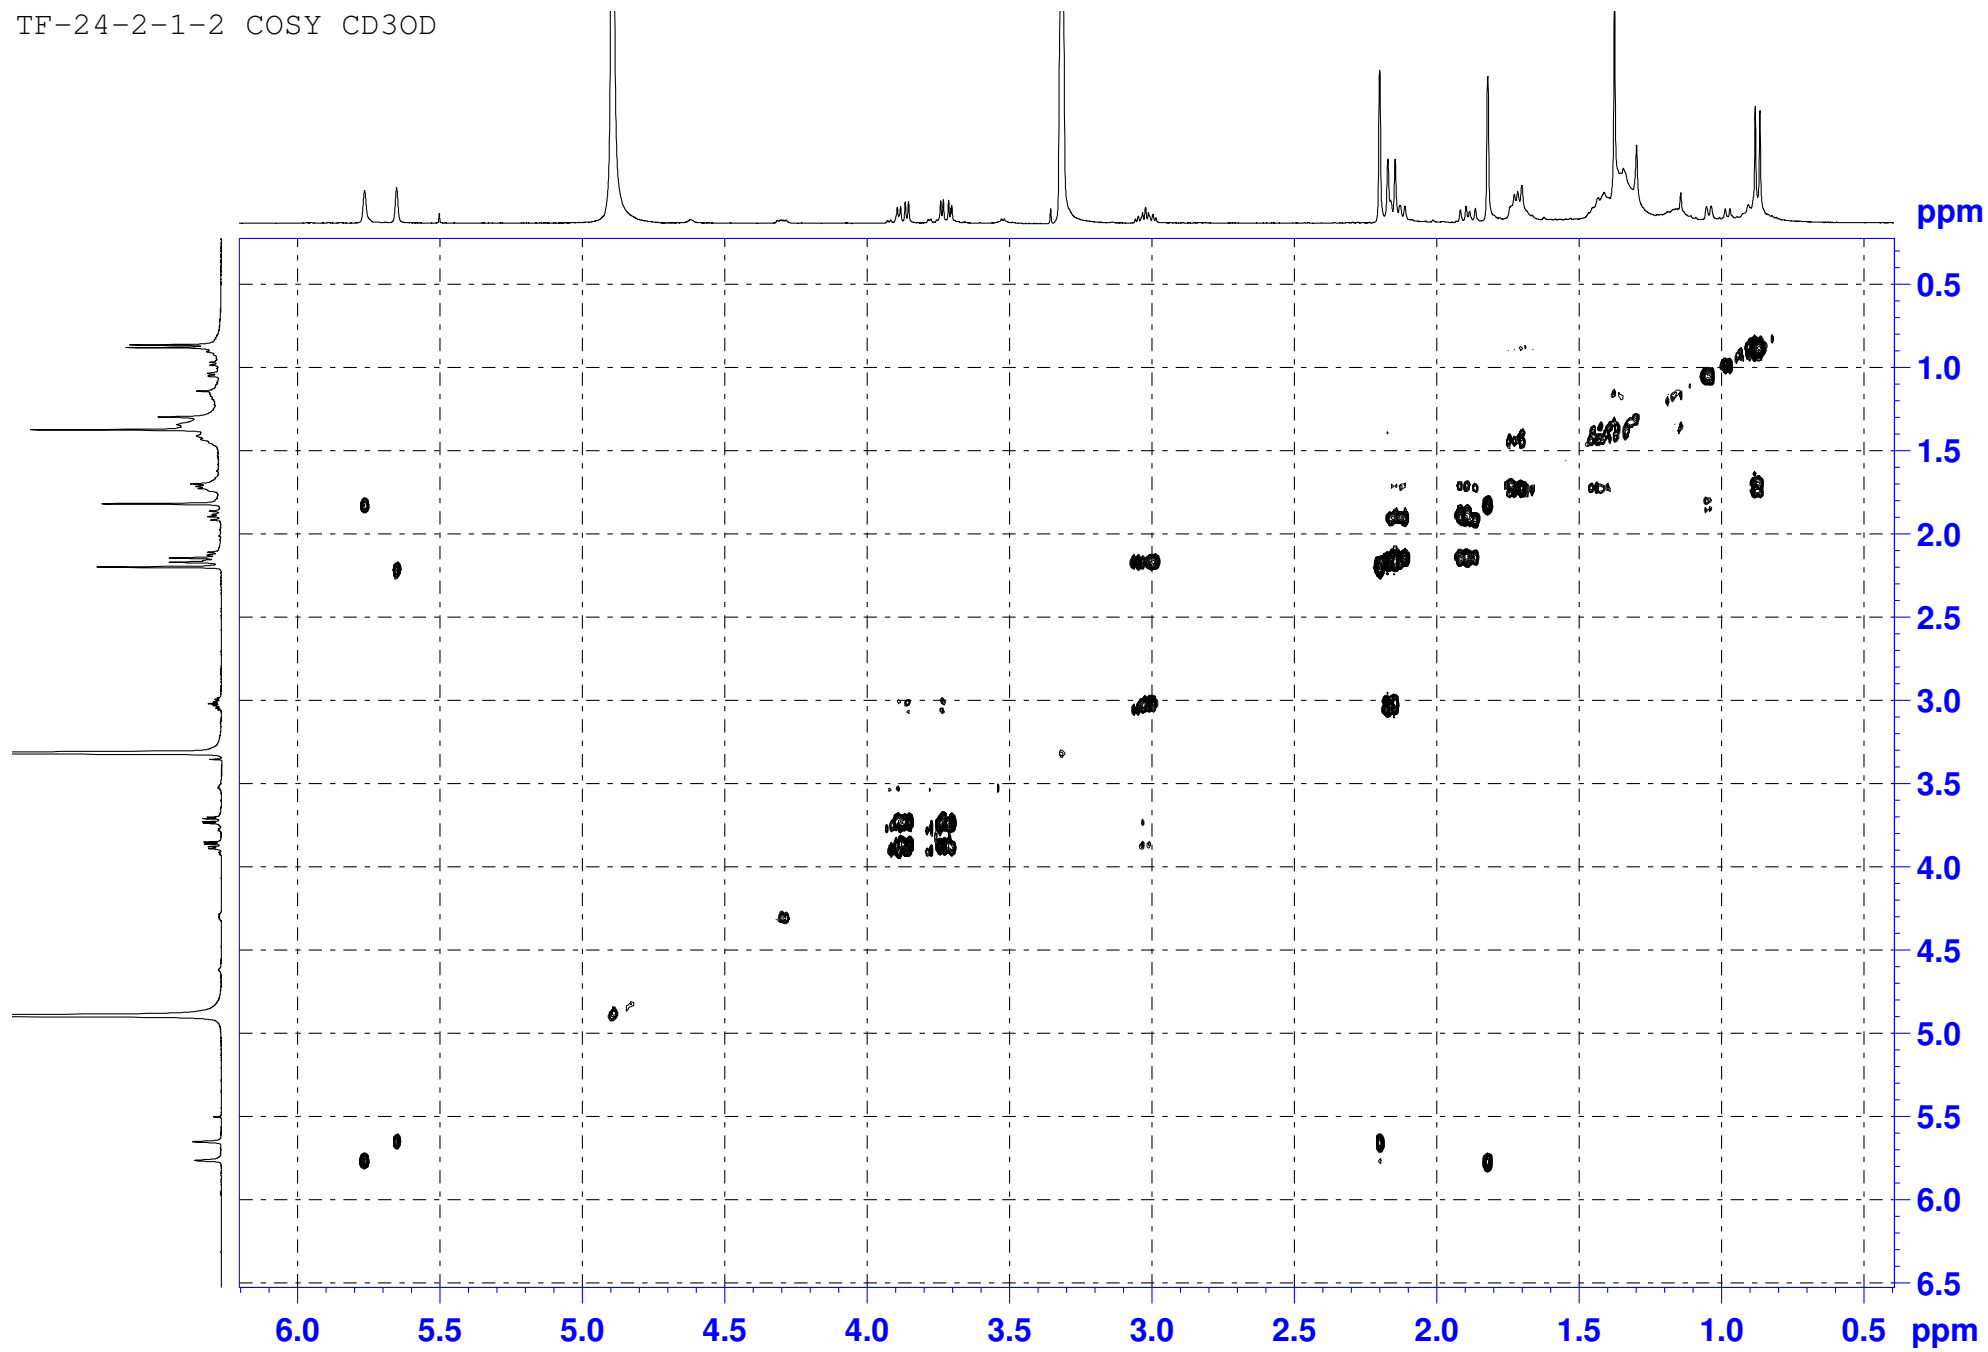

Figure S2-4 COSY Spectrum of 2 in CD<sub>3</sub>OD



TF-24-2-1-2 HMBC CD3OD

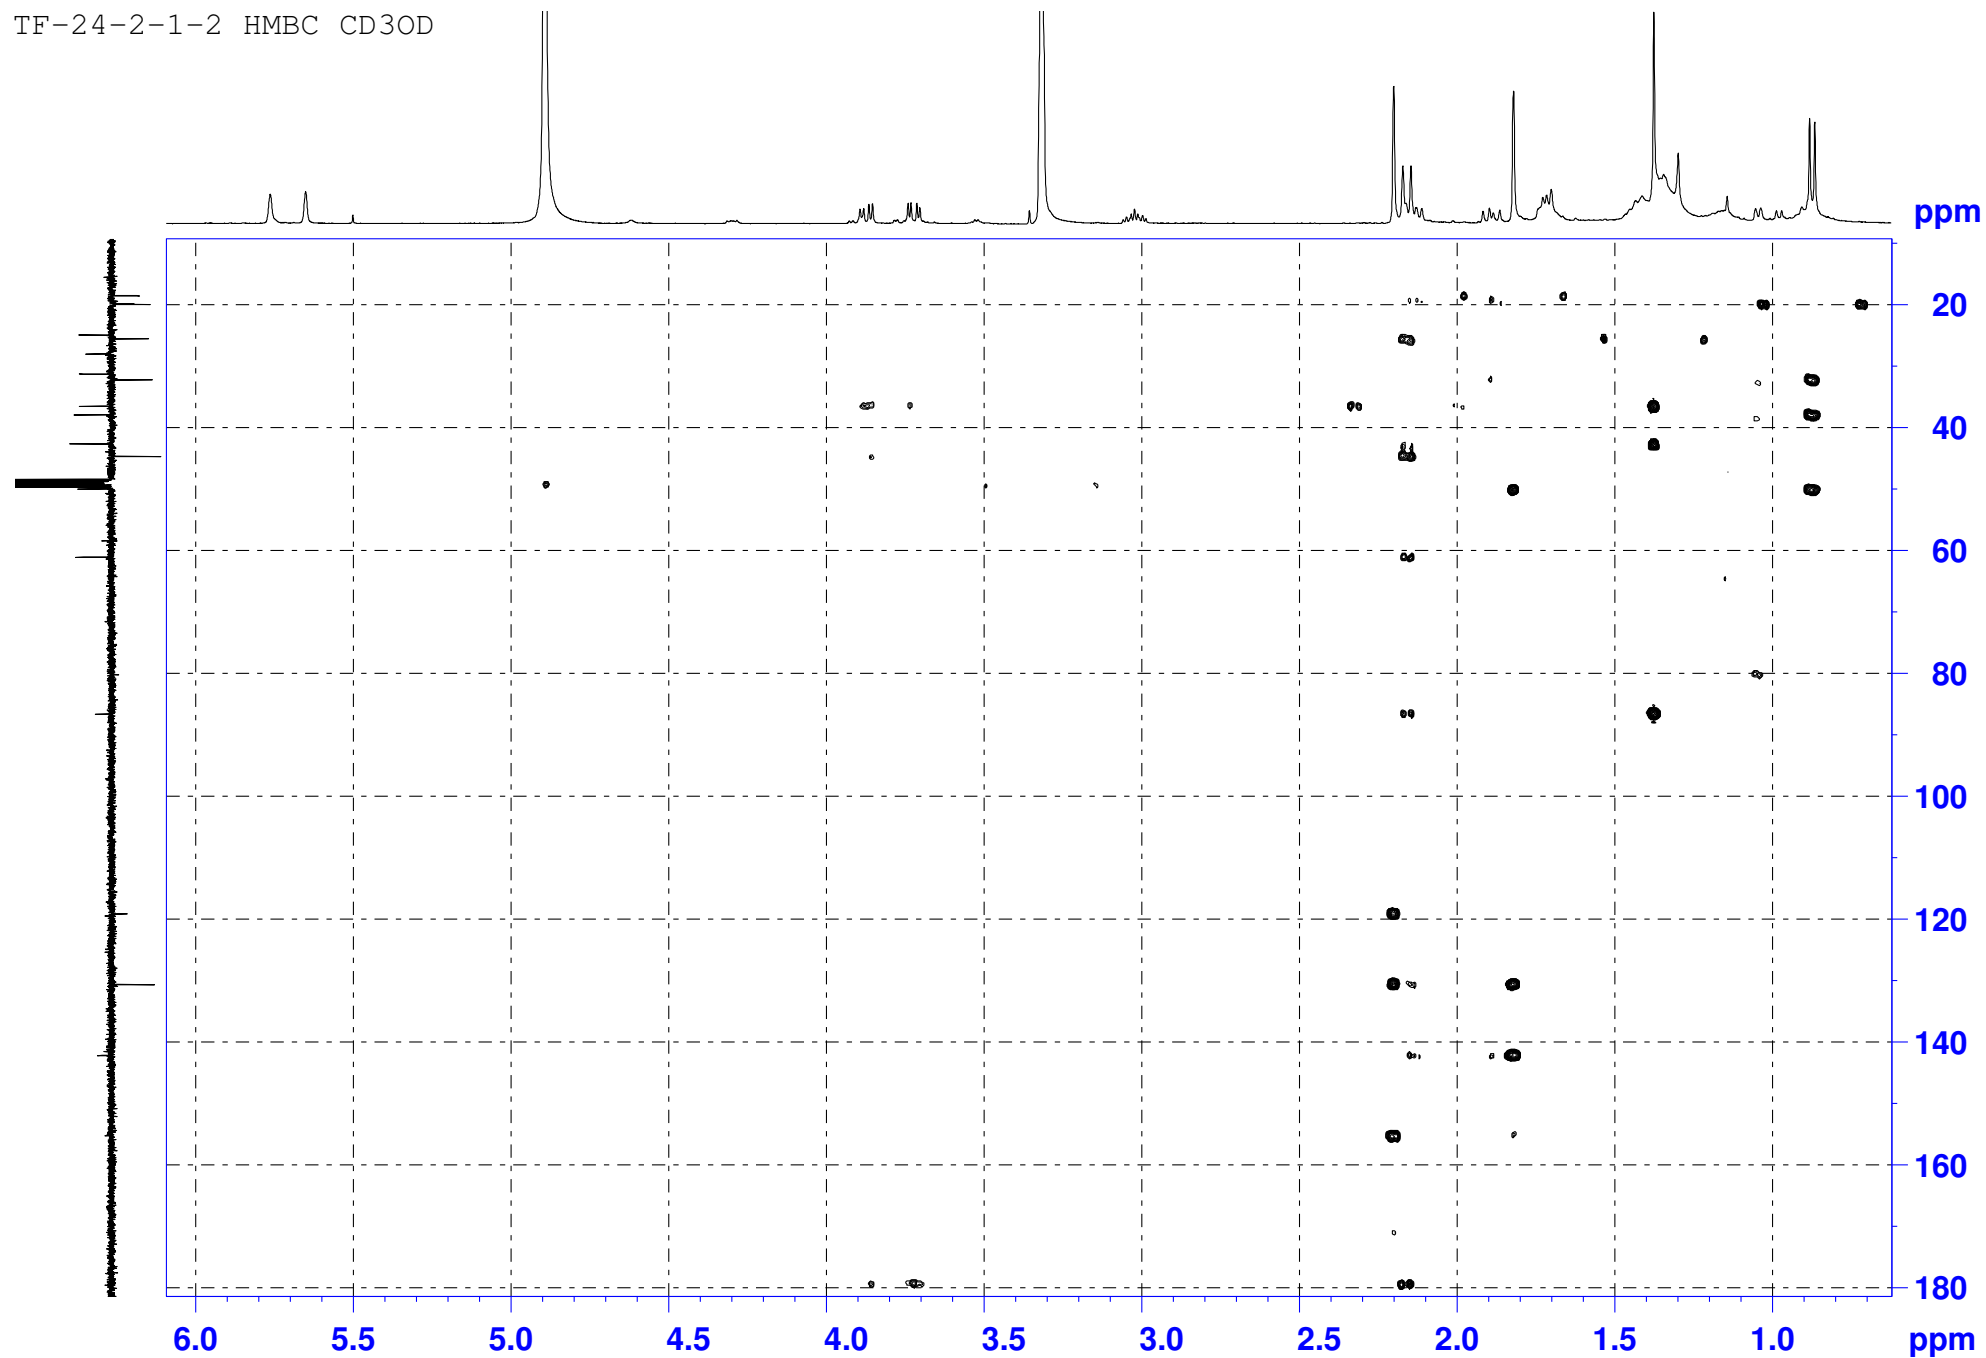

Figure S2-5 HMBC Spectrum of **2** in CD<sub>3</sub>OD

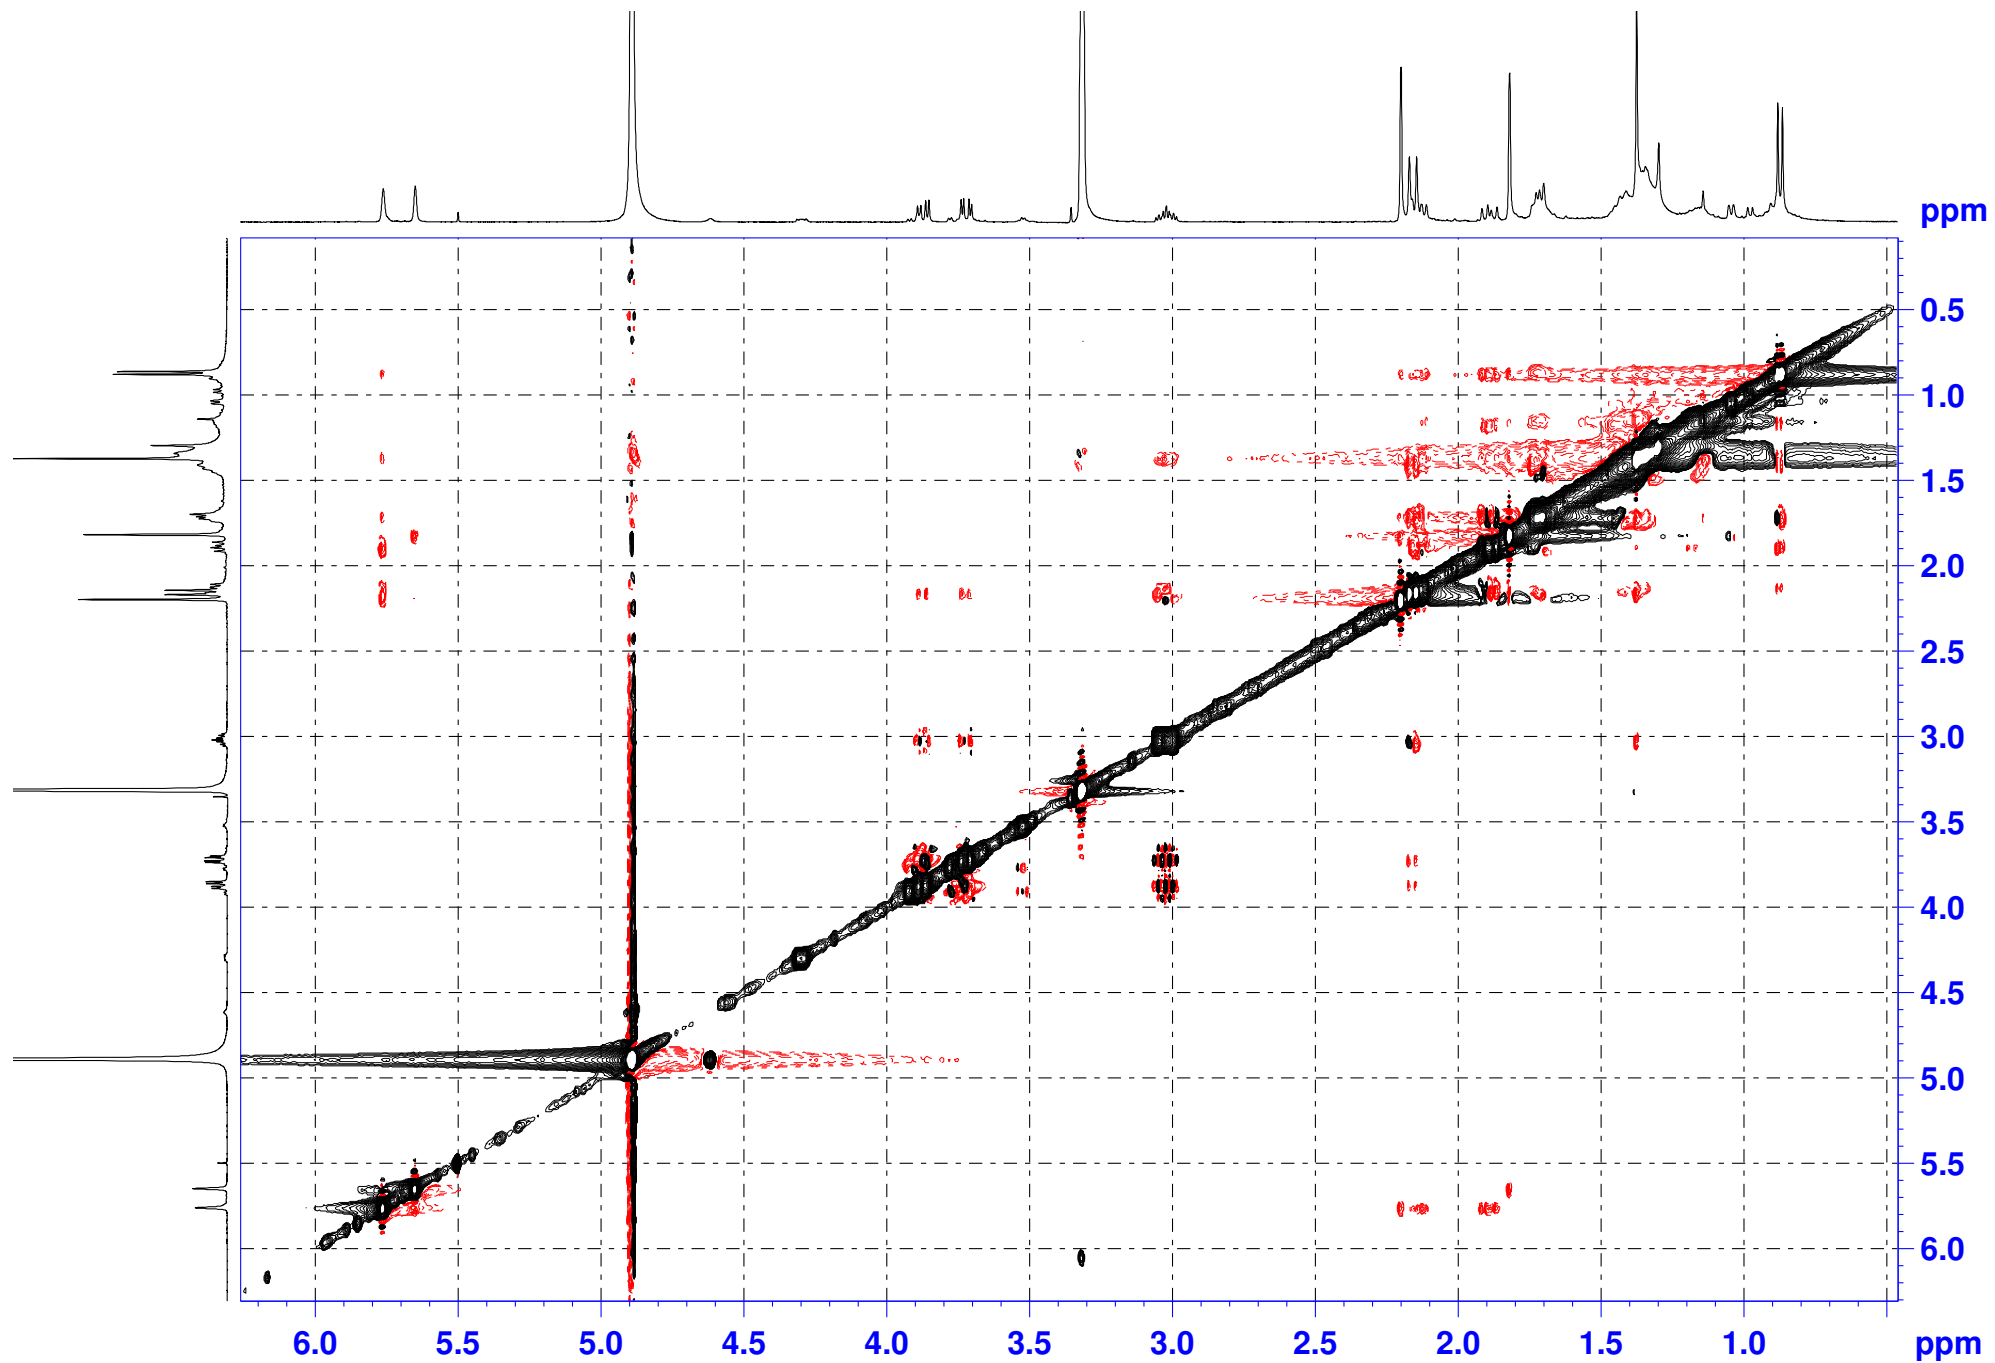

Figure S2-6 NOESY Spectrum of 2 in CD<sub>3</sub>OD

TF-26-2-2-1 1H NMR CD3OD 400 MHz

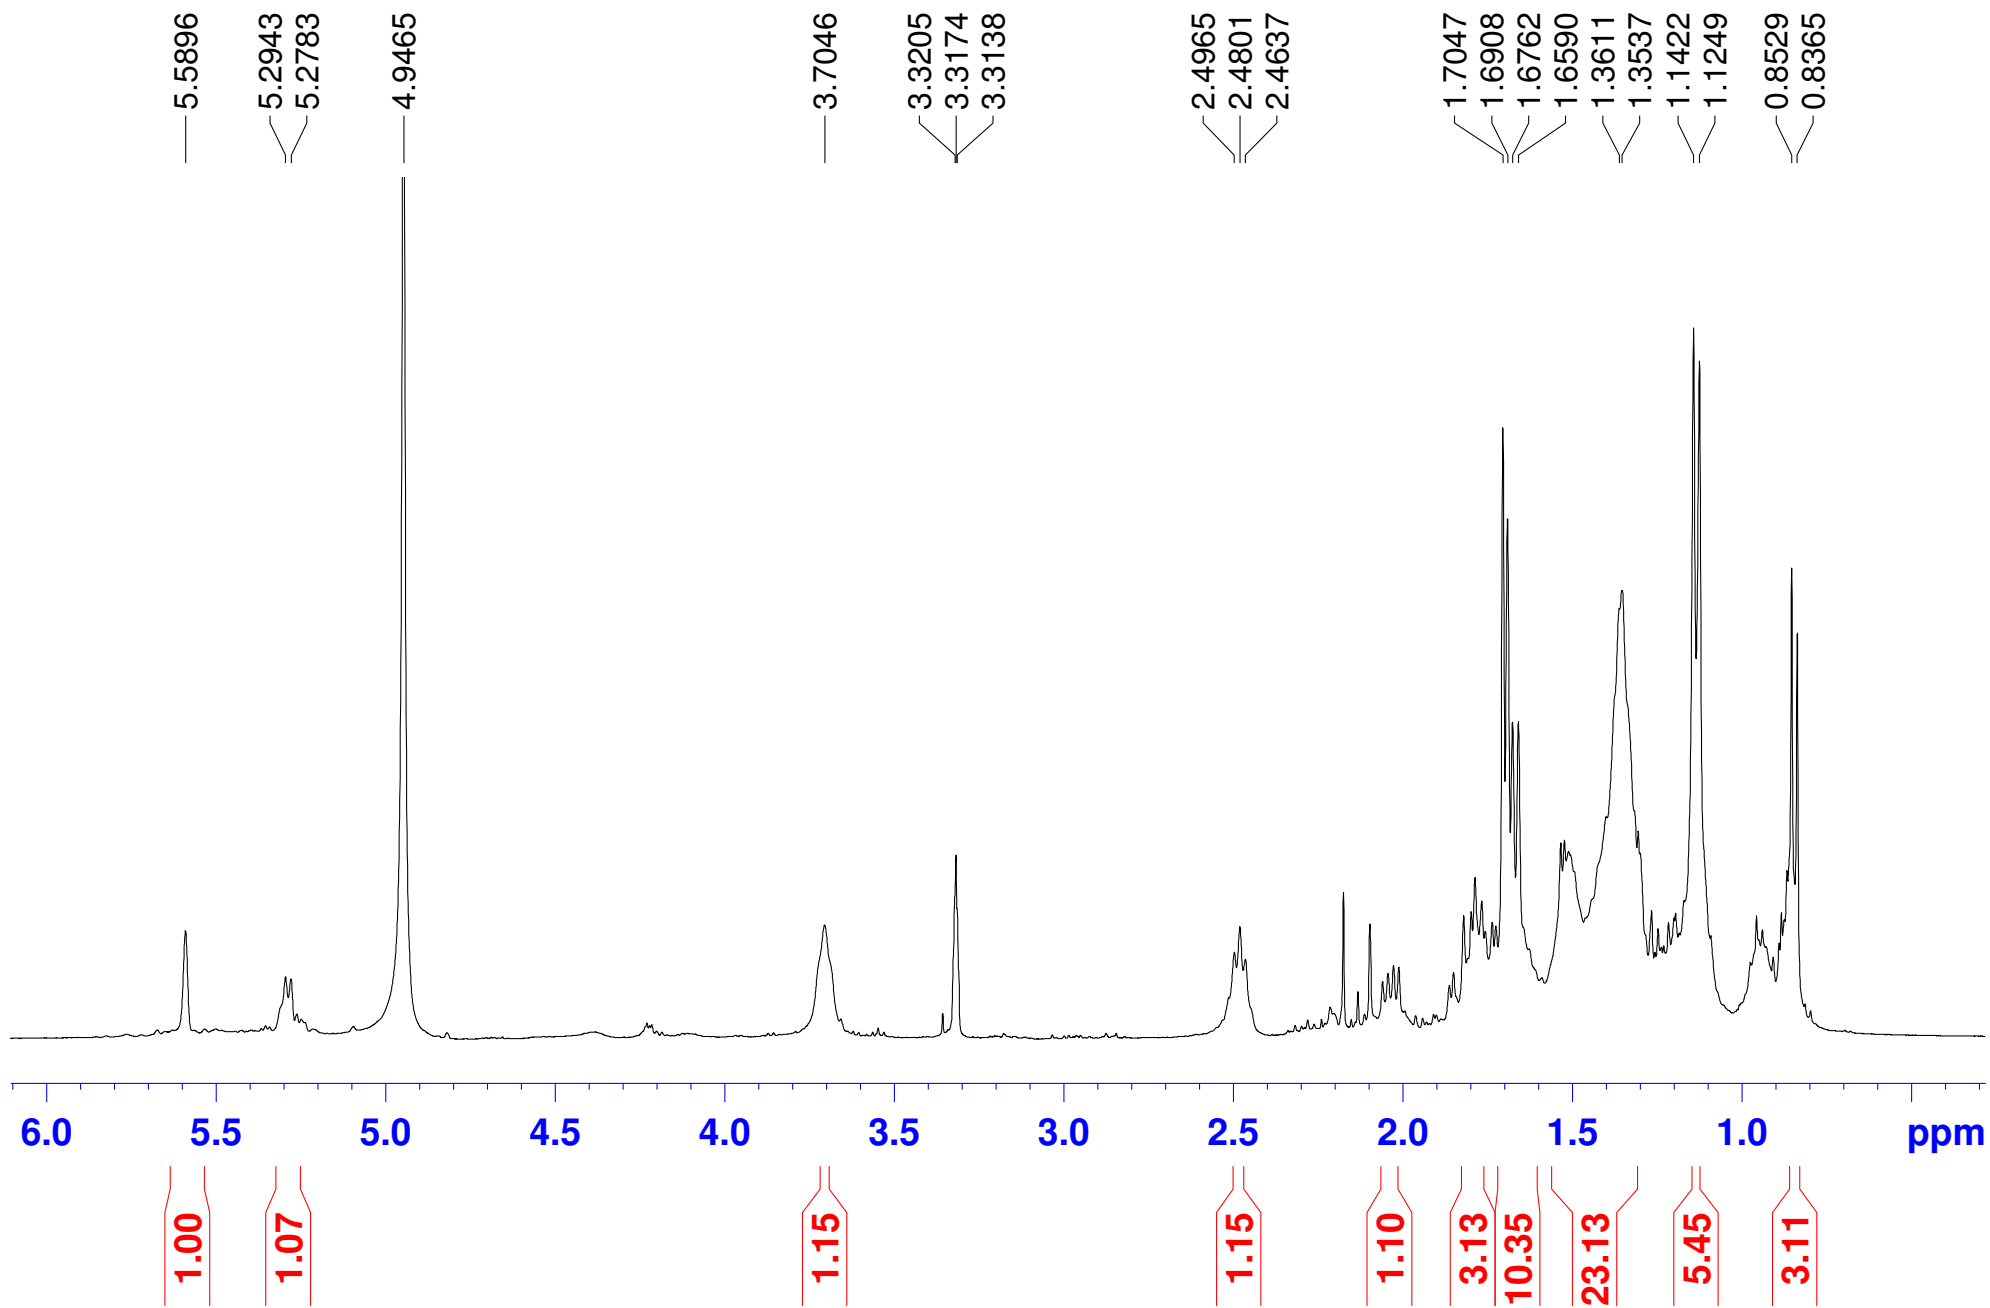

Figure S3-1 <sup>1</sup>H NMR Spectrum of **3** in CD<sub>3</sub>OD (400 MHz)

TF-26-2-2-1 <sup>13</sup>C NMR CD<sub>3</sub>OD 100 MHz

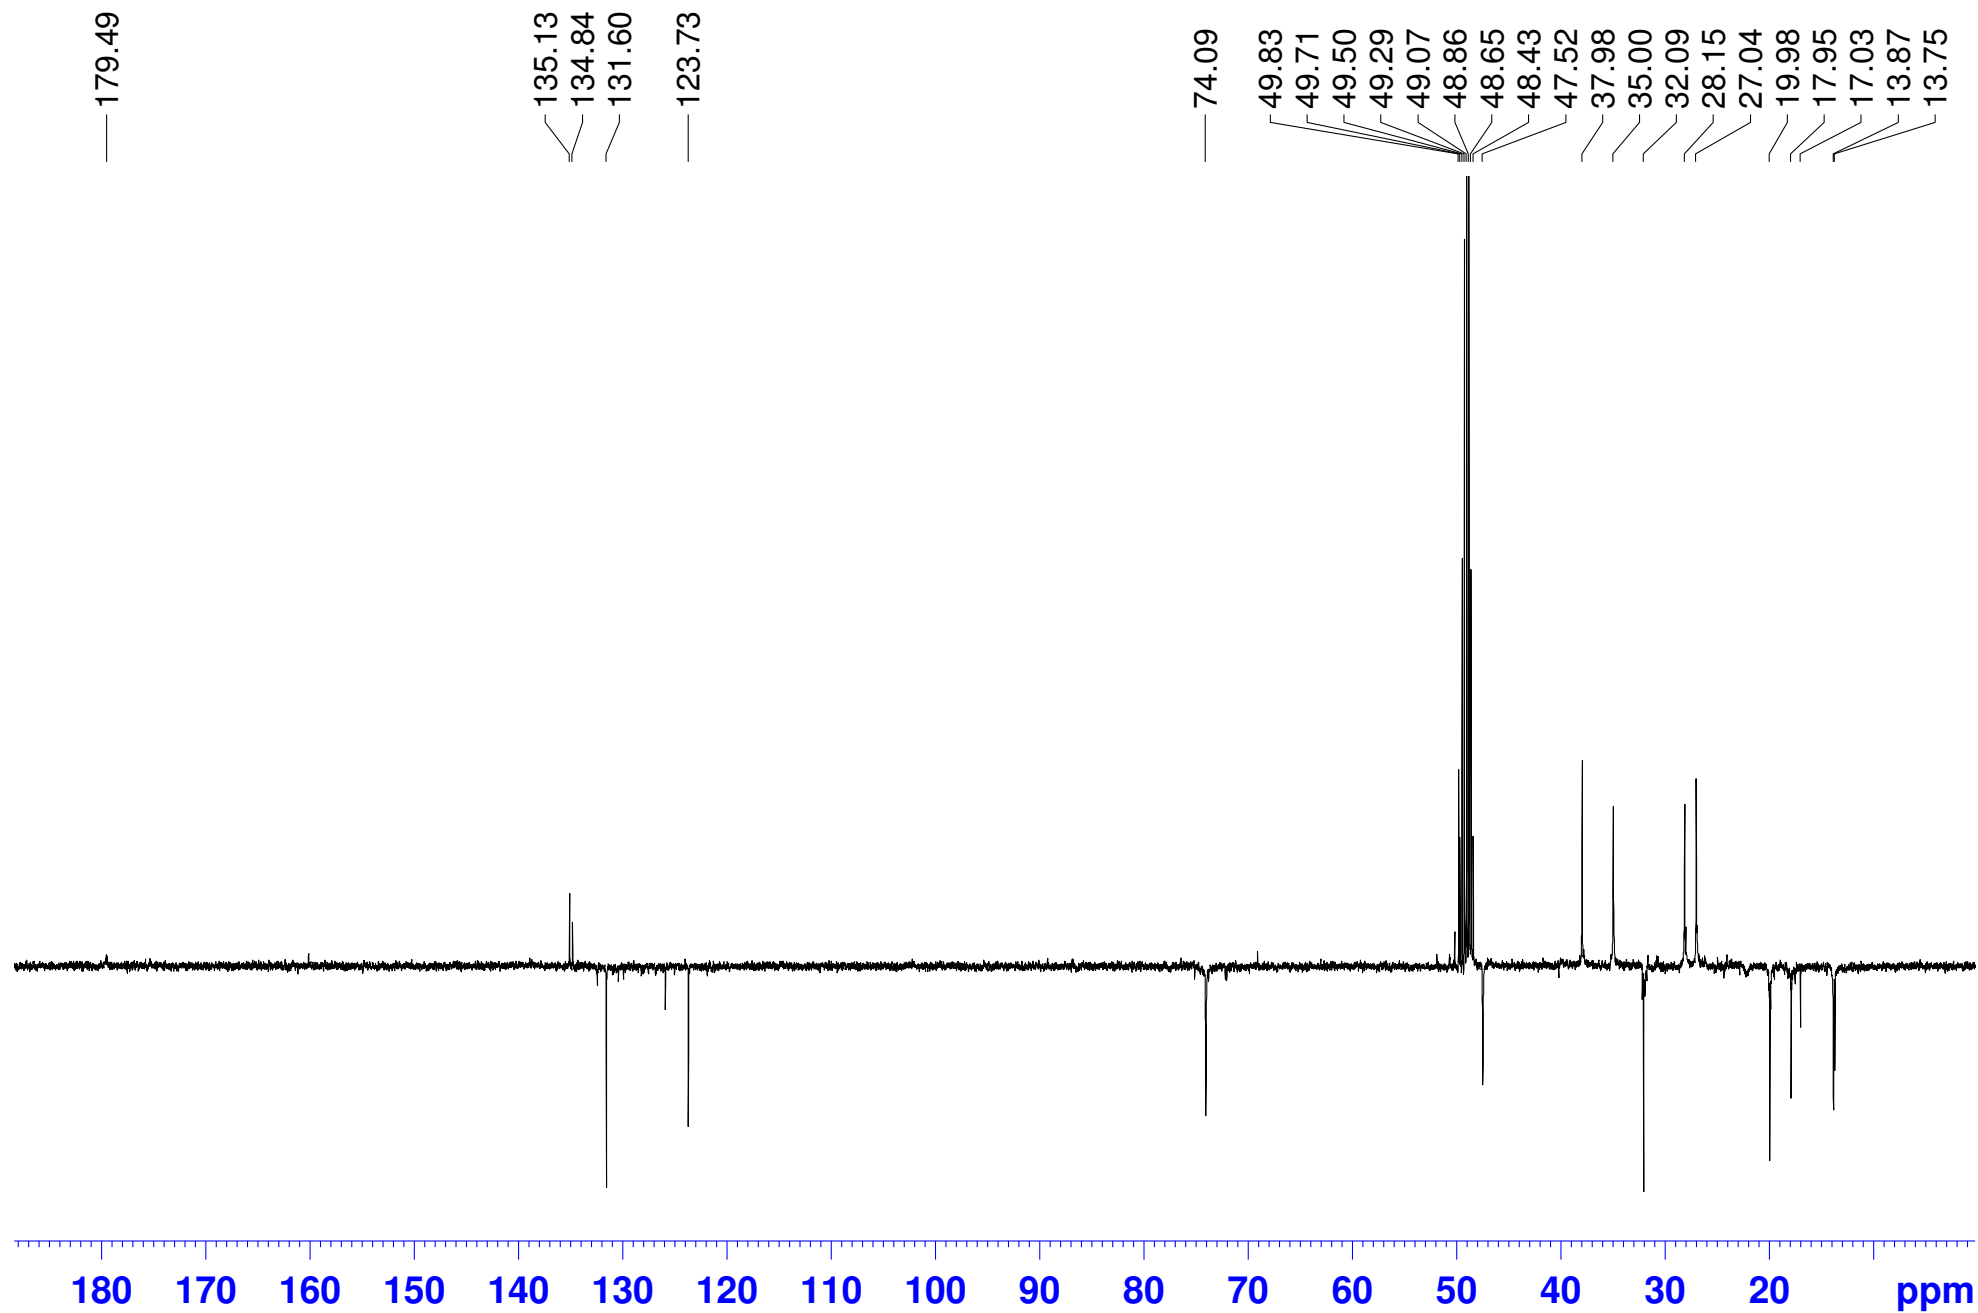

Figure S3-2 <sup>13</sup>C Spectrum of **3** in CD<sub>3</sub>OD (100 MHz)

TF-26-2-2-1 HSQC CD3OD

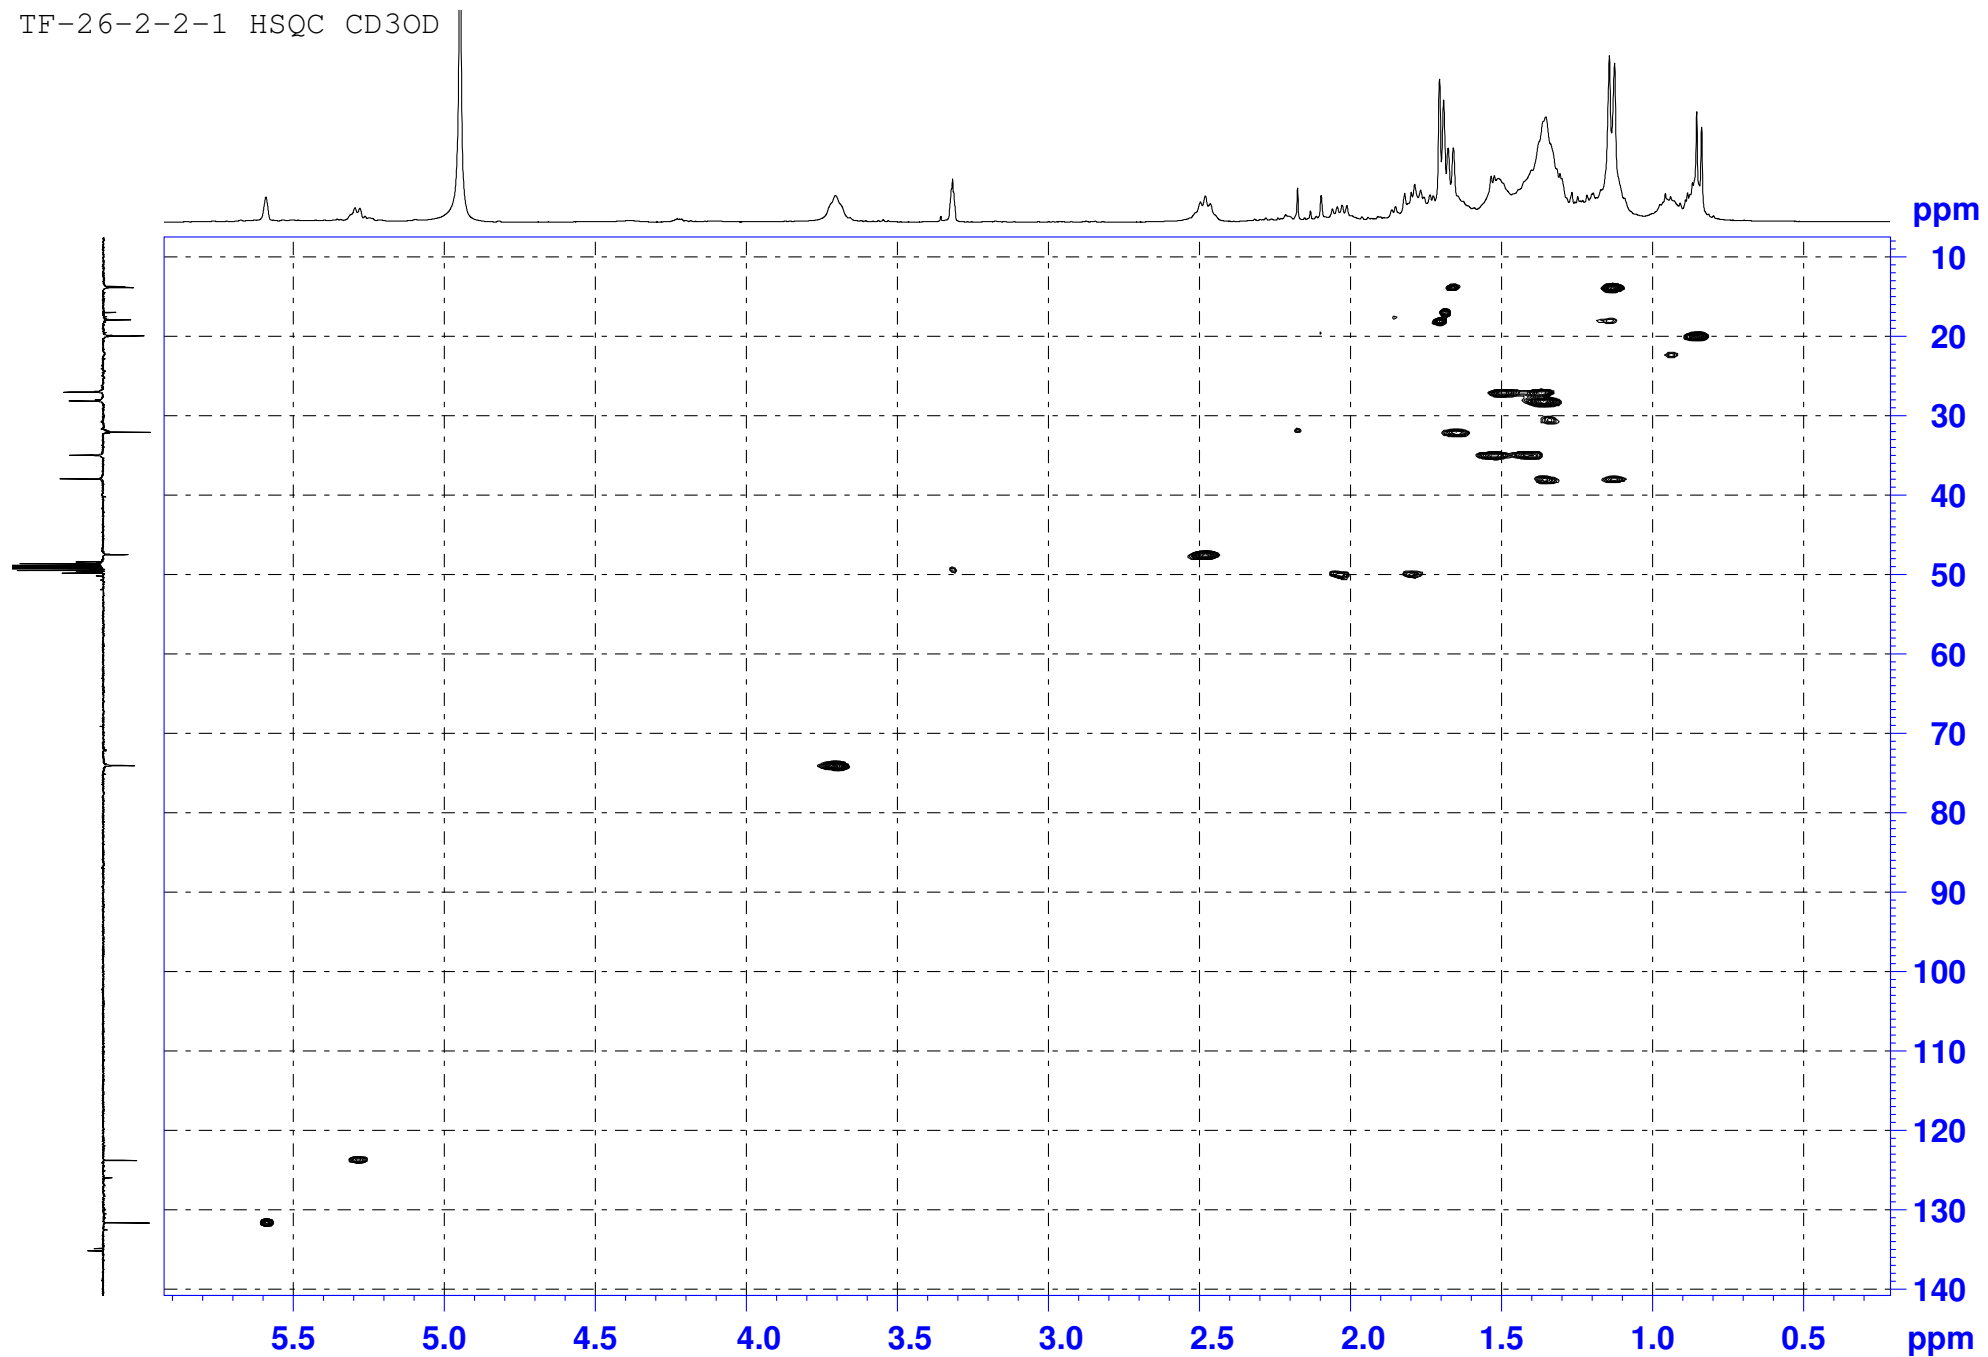

Figure S3-3 HSQC Spectrum of 3 in CD<sub>3</sub>OD

TF-26-2-2-1 COSY CD3OD

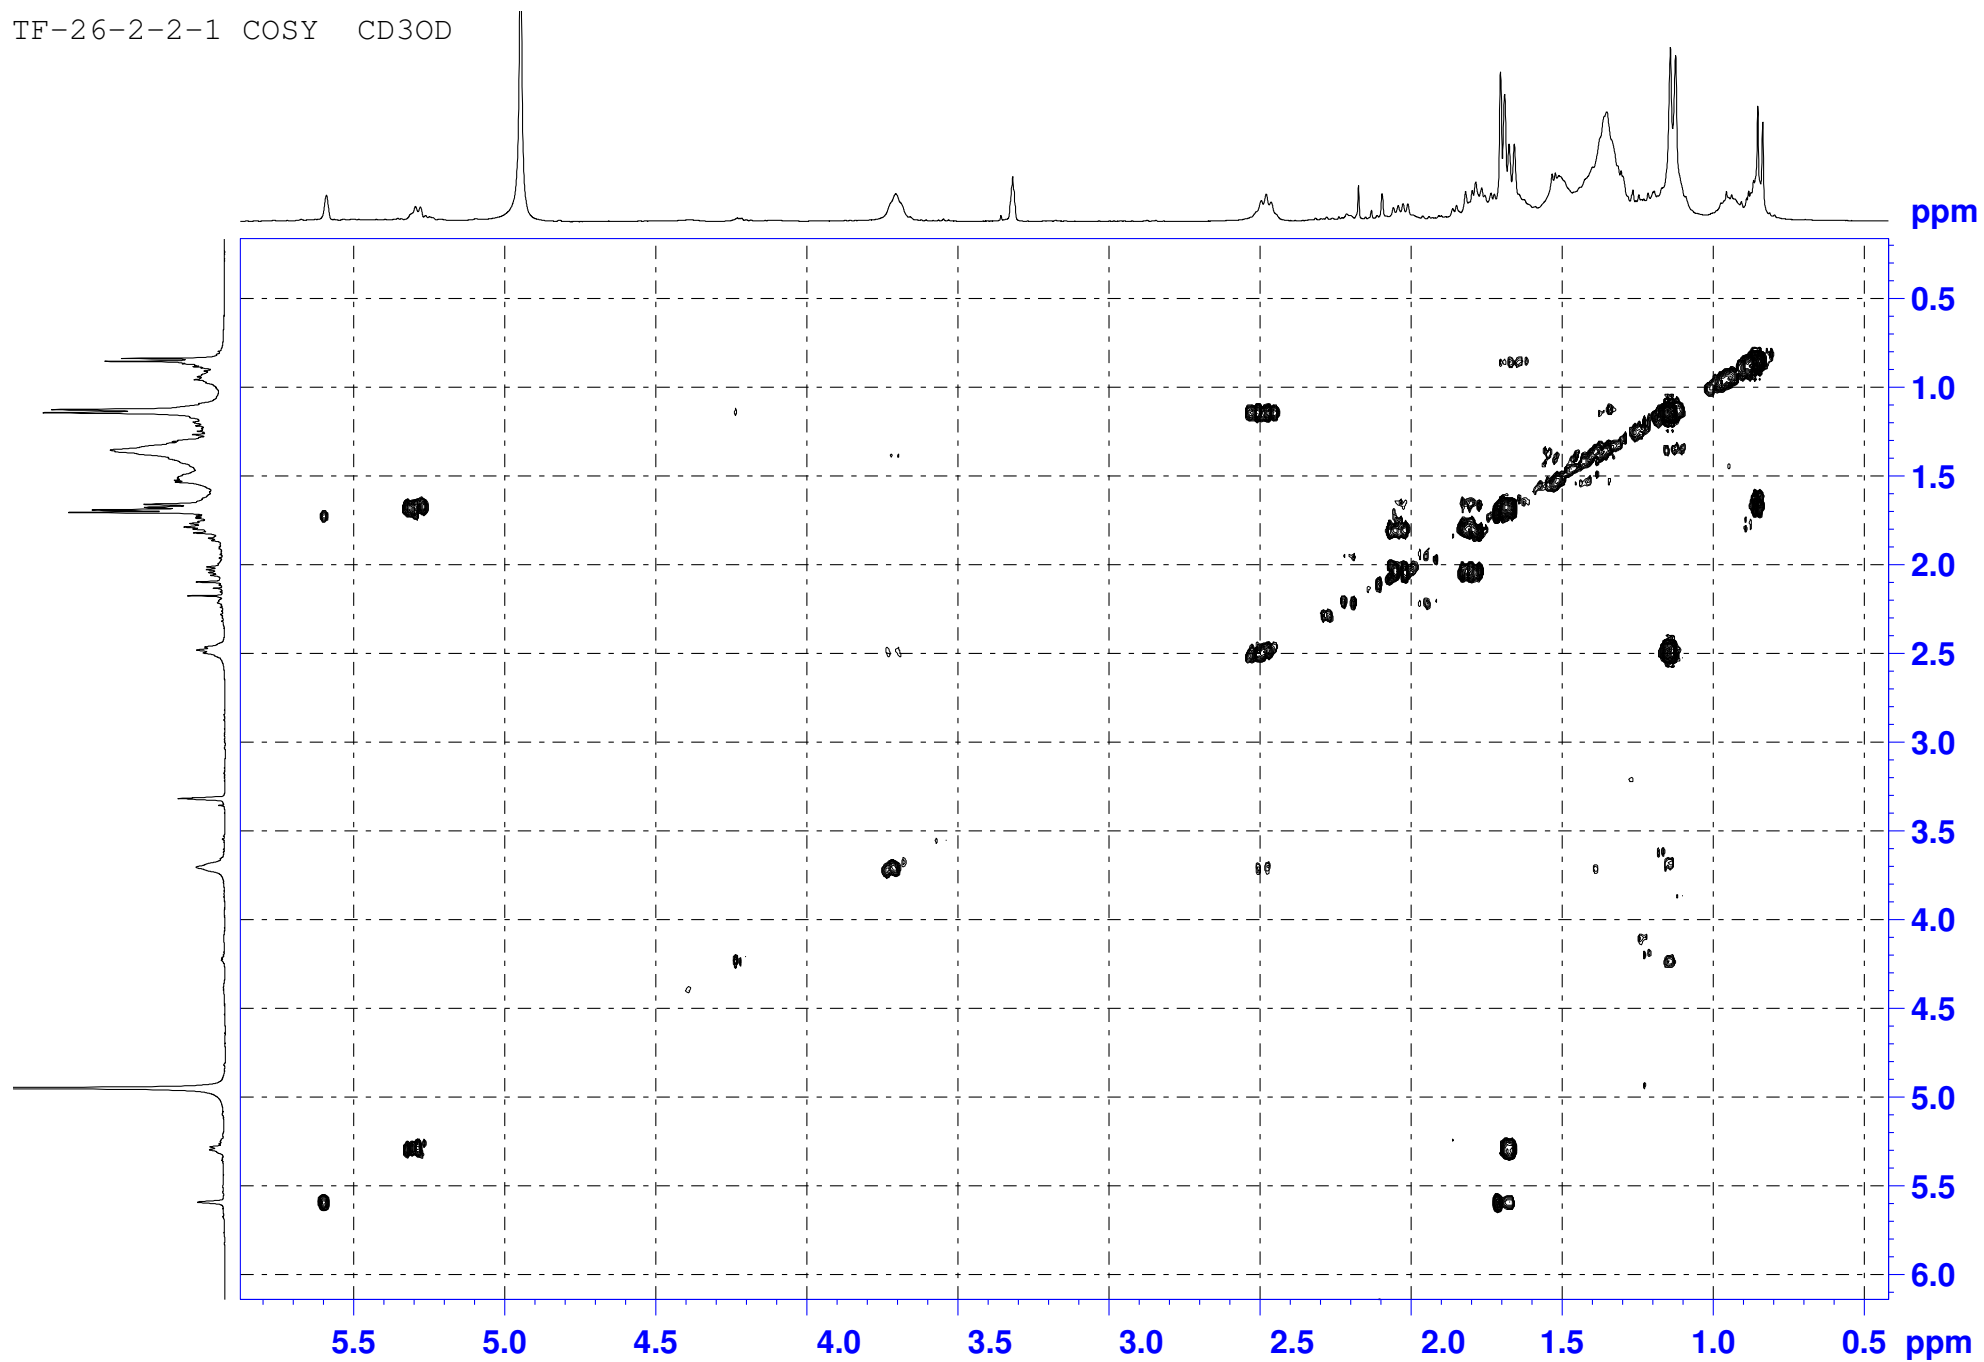

Figure S3-4 COSY Spectrum of 3 in CD<sub>3</sub>OD

TF-26-2-2-1 HMBC CD3OD

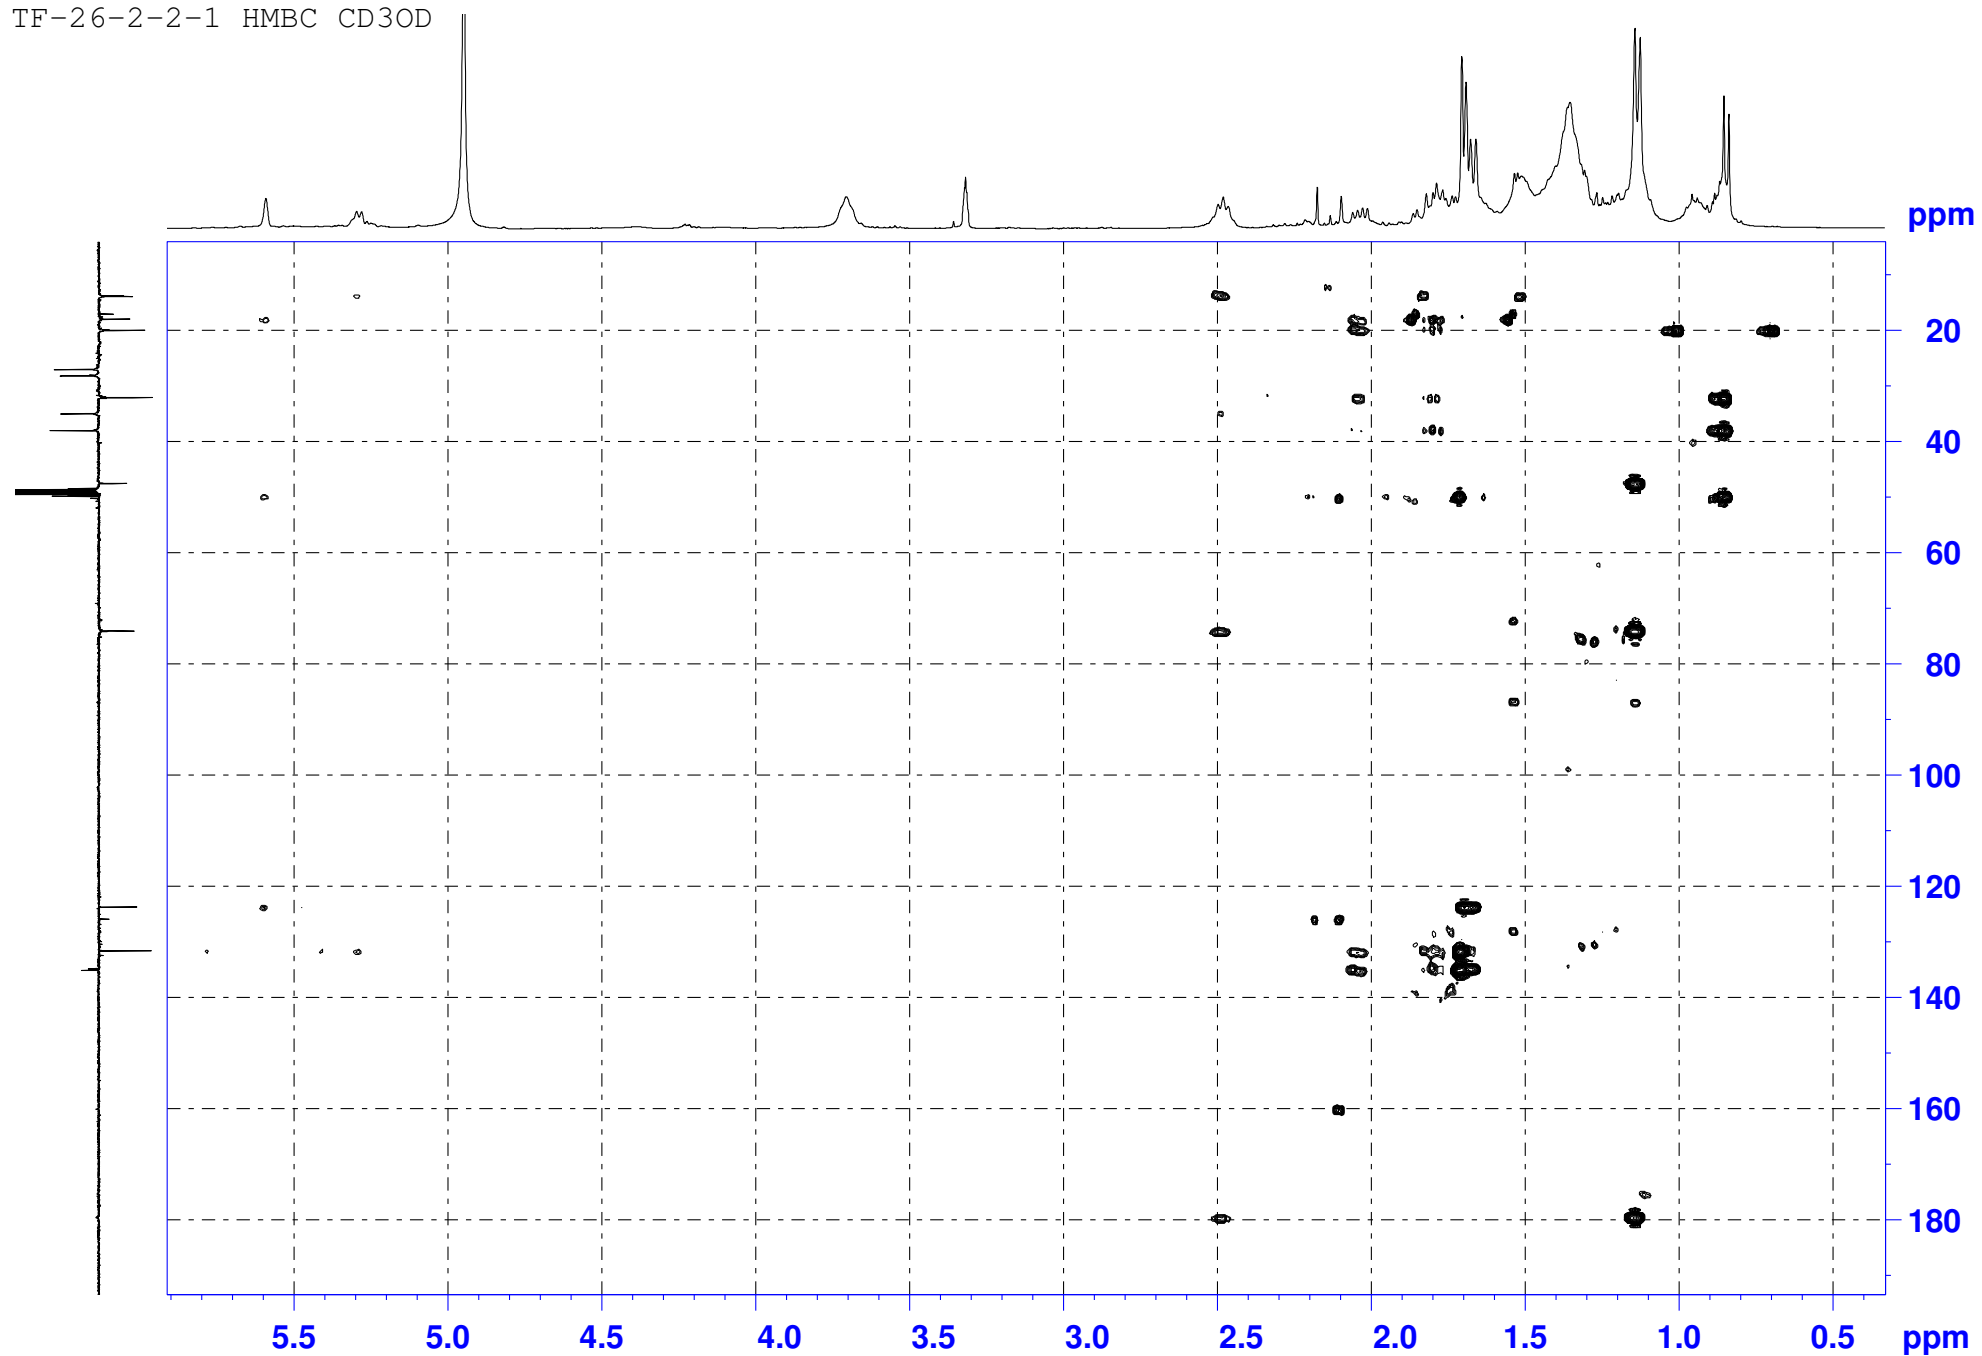

Figure S3-5 HMBC Spectrum of 3 in CD<sub>3</sub>OD

TF-26-2-2-1 NOESY CD3OD

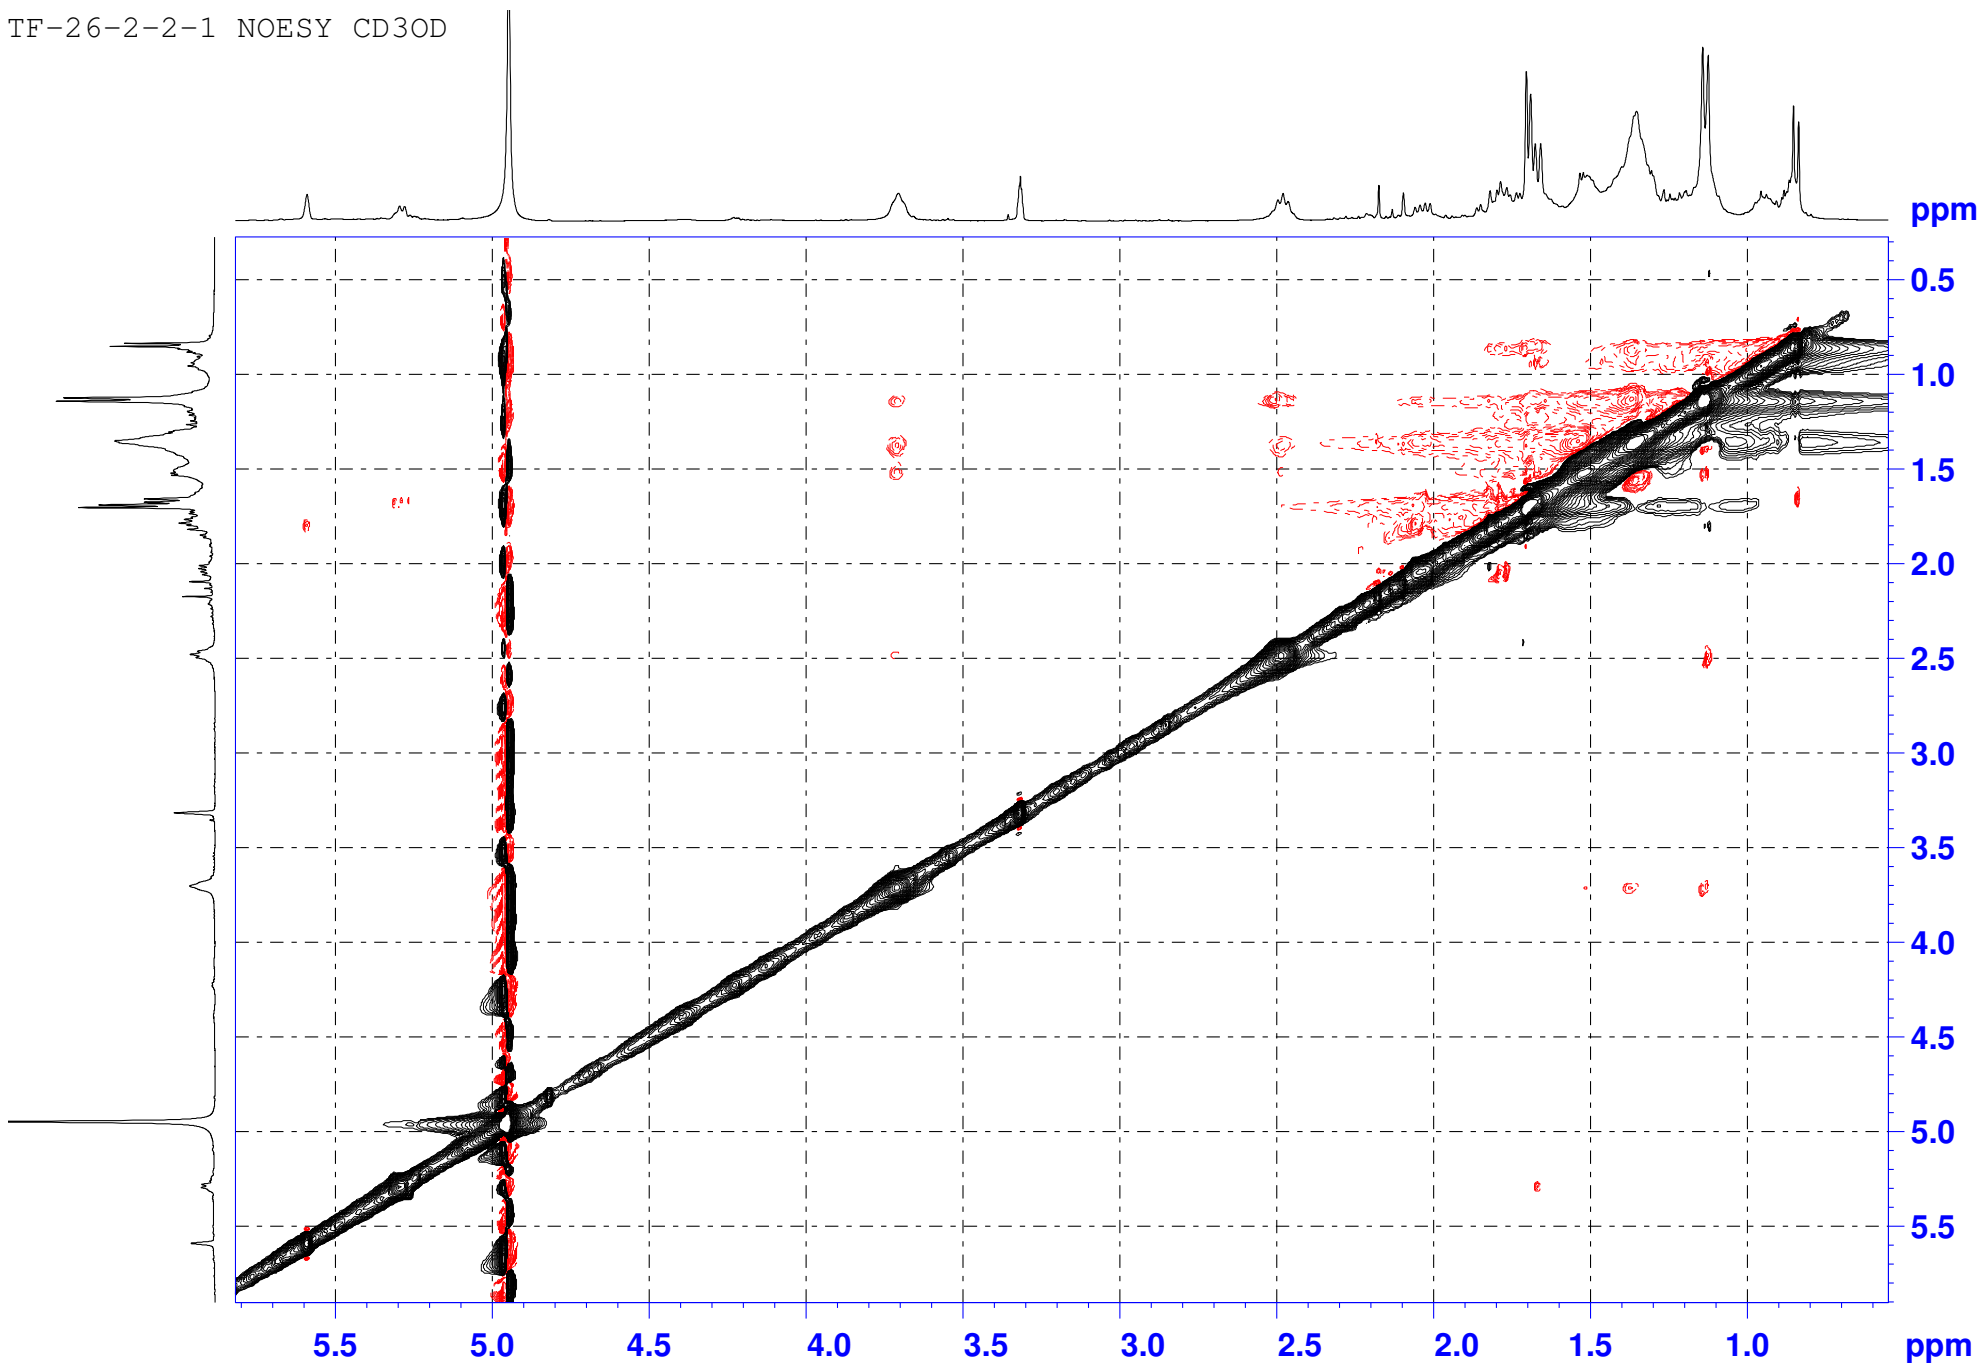

Figure S3-6 NOESY Spectrum of 3 in CD<sub>3</sub>OD



TF-26-2-2-2 1H NMR CD3OD 400 MHz

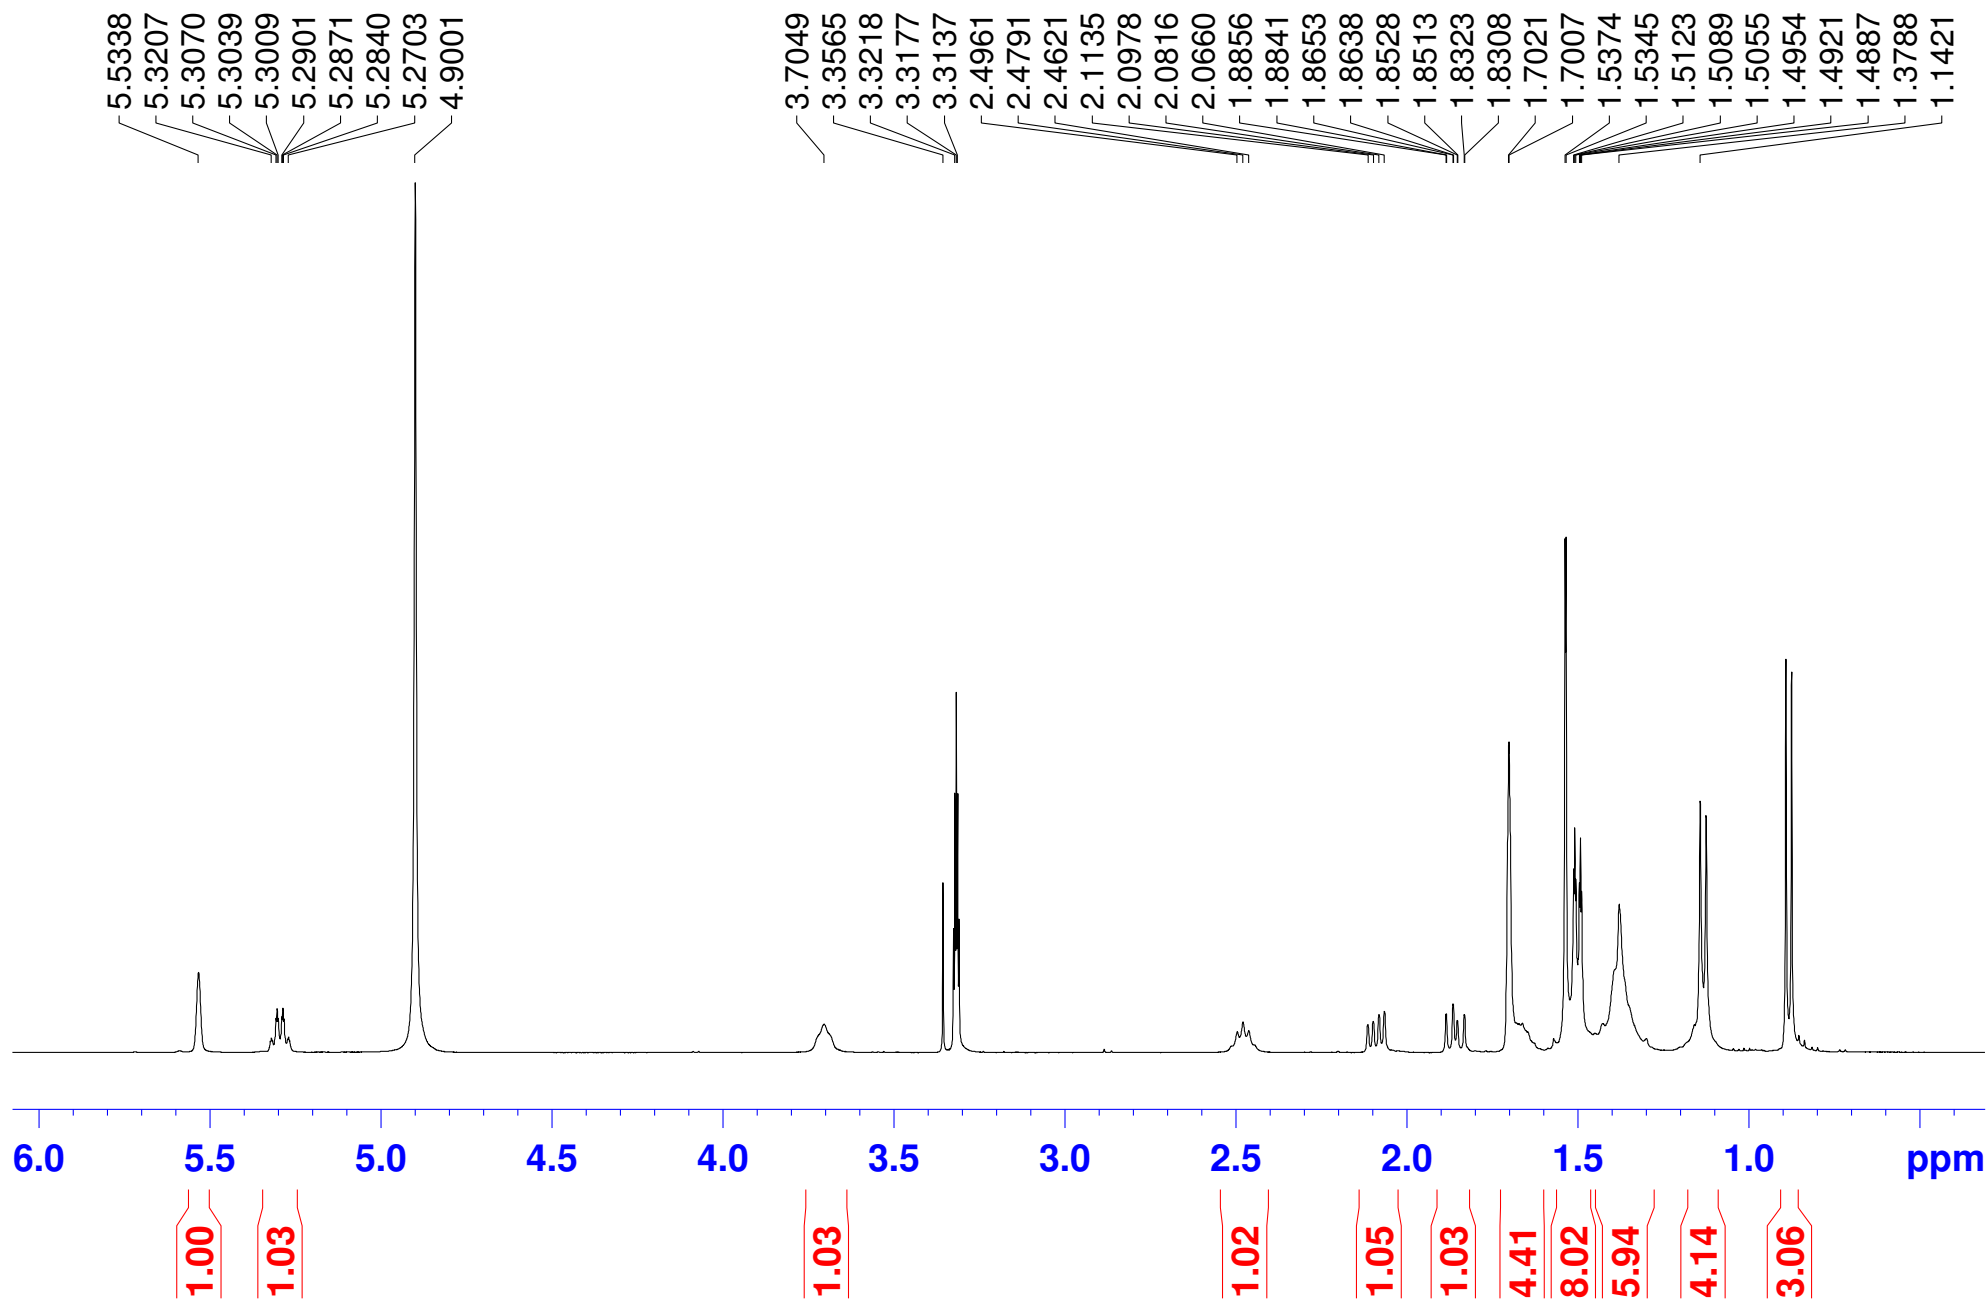

Figure S4-1 <sup>1</sup>H NMR Spectrum of 4 in CD<sub>3</sub>OD (400 MHz)

TF-26-2-2-2 <sup>13</sup>C NMR CD3OD 100 MHz

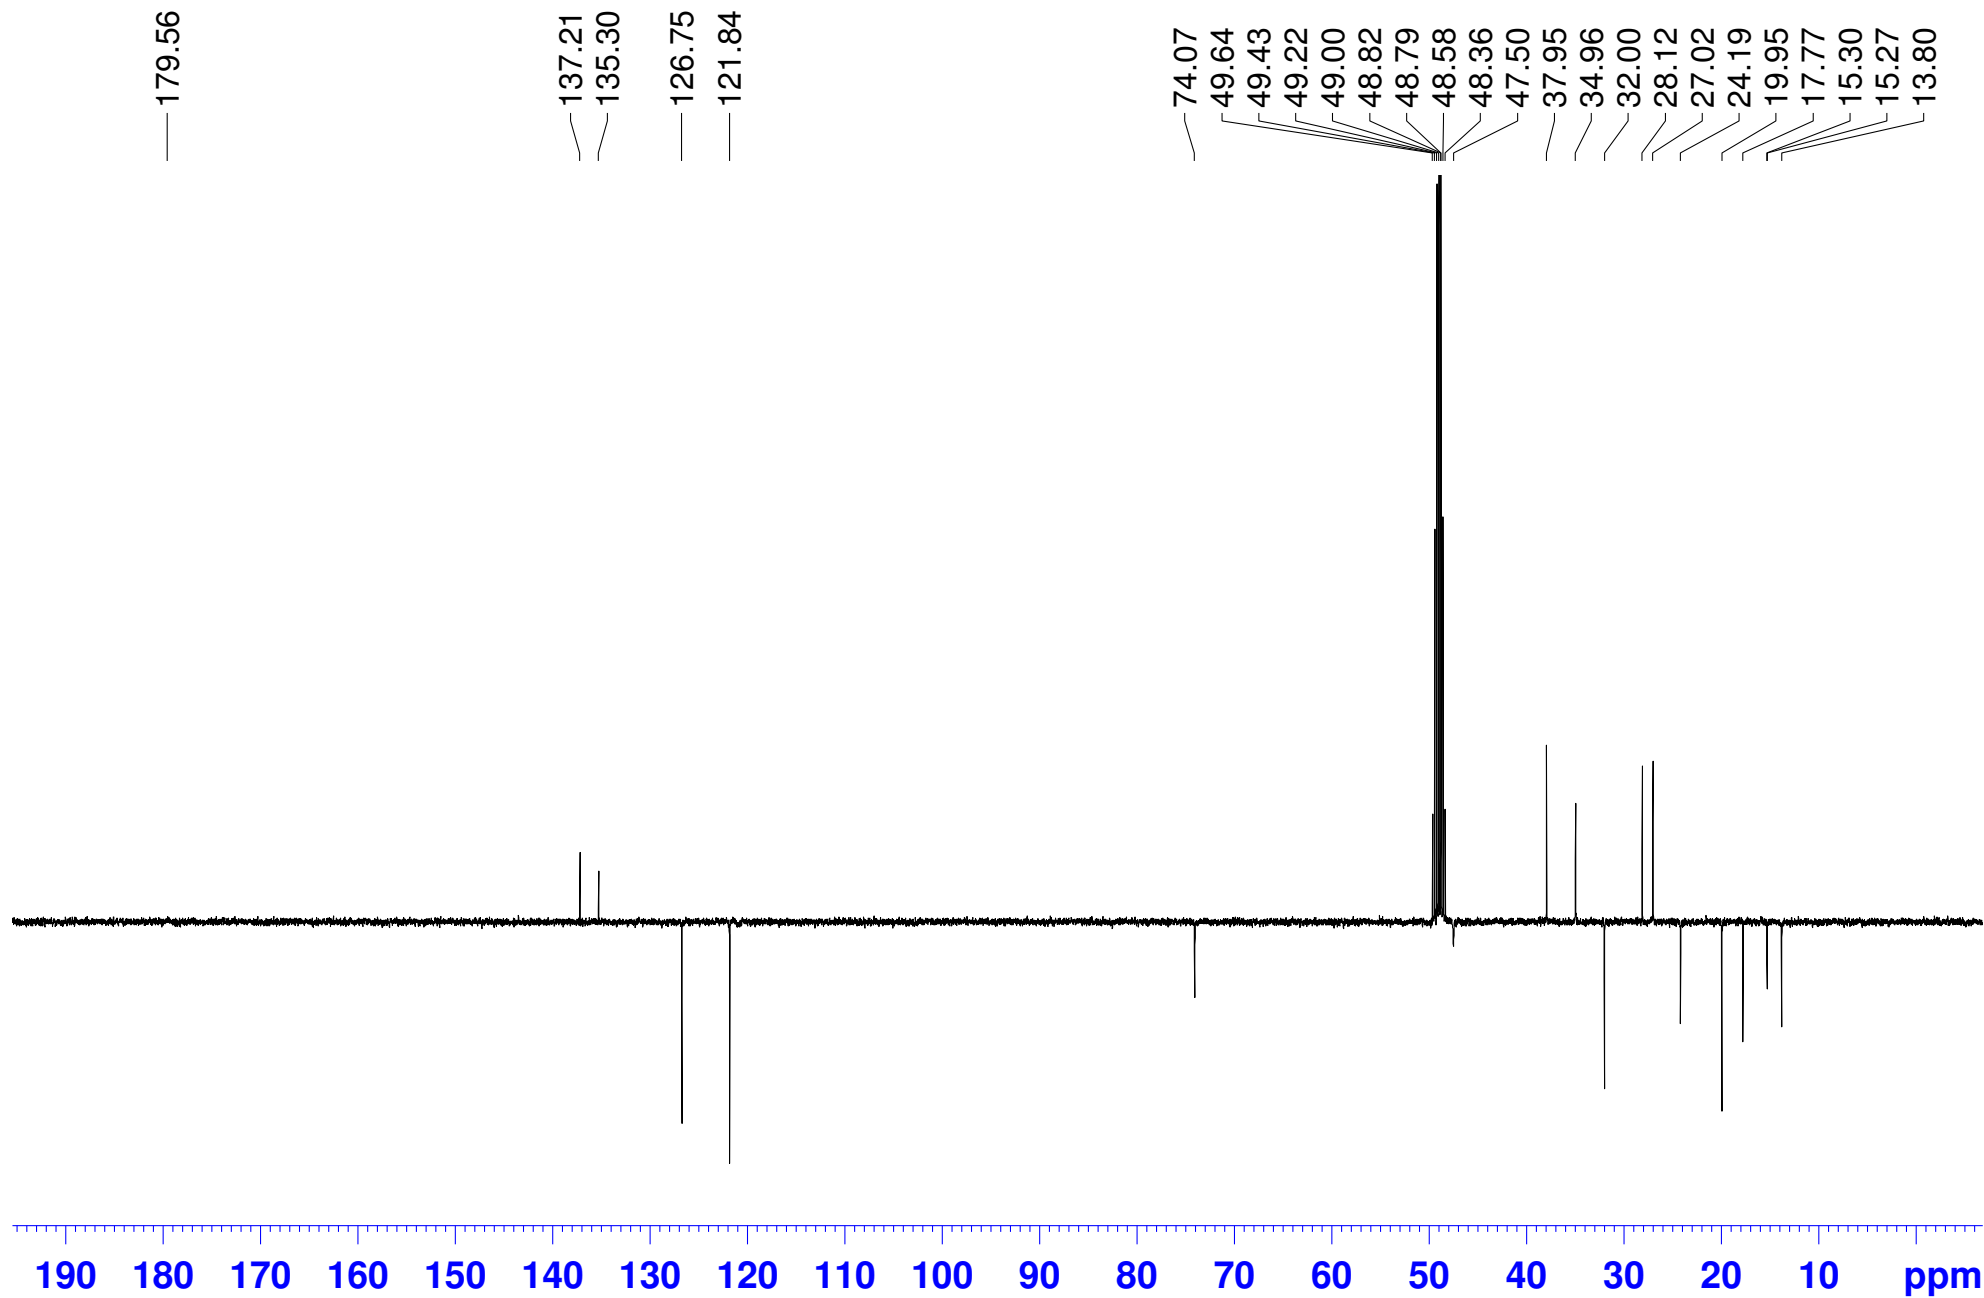

Figure S4-2 <sup>13</sup>C Spectrum of 4 in CD<sub>3</sub>OD (100 MHz)

TF-26-2-2-2 HSQC CD3OD

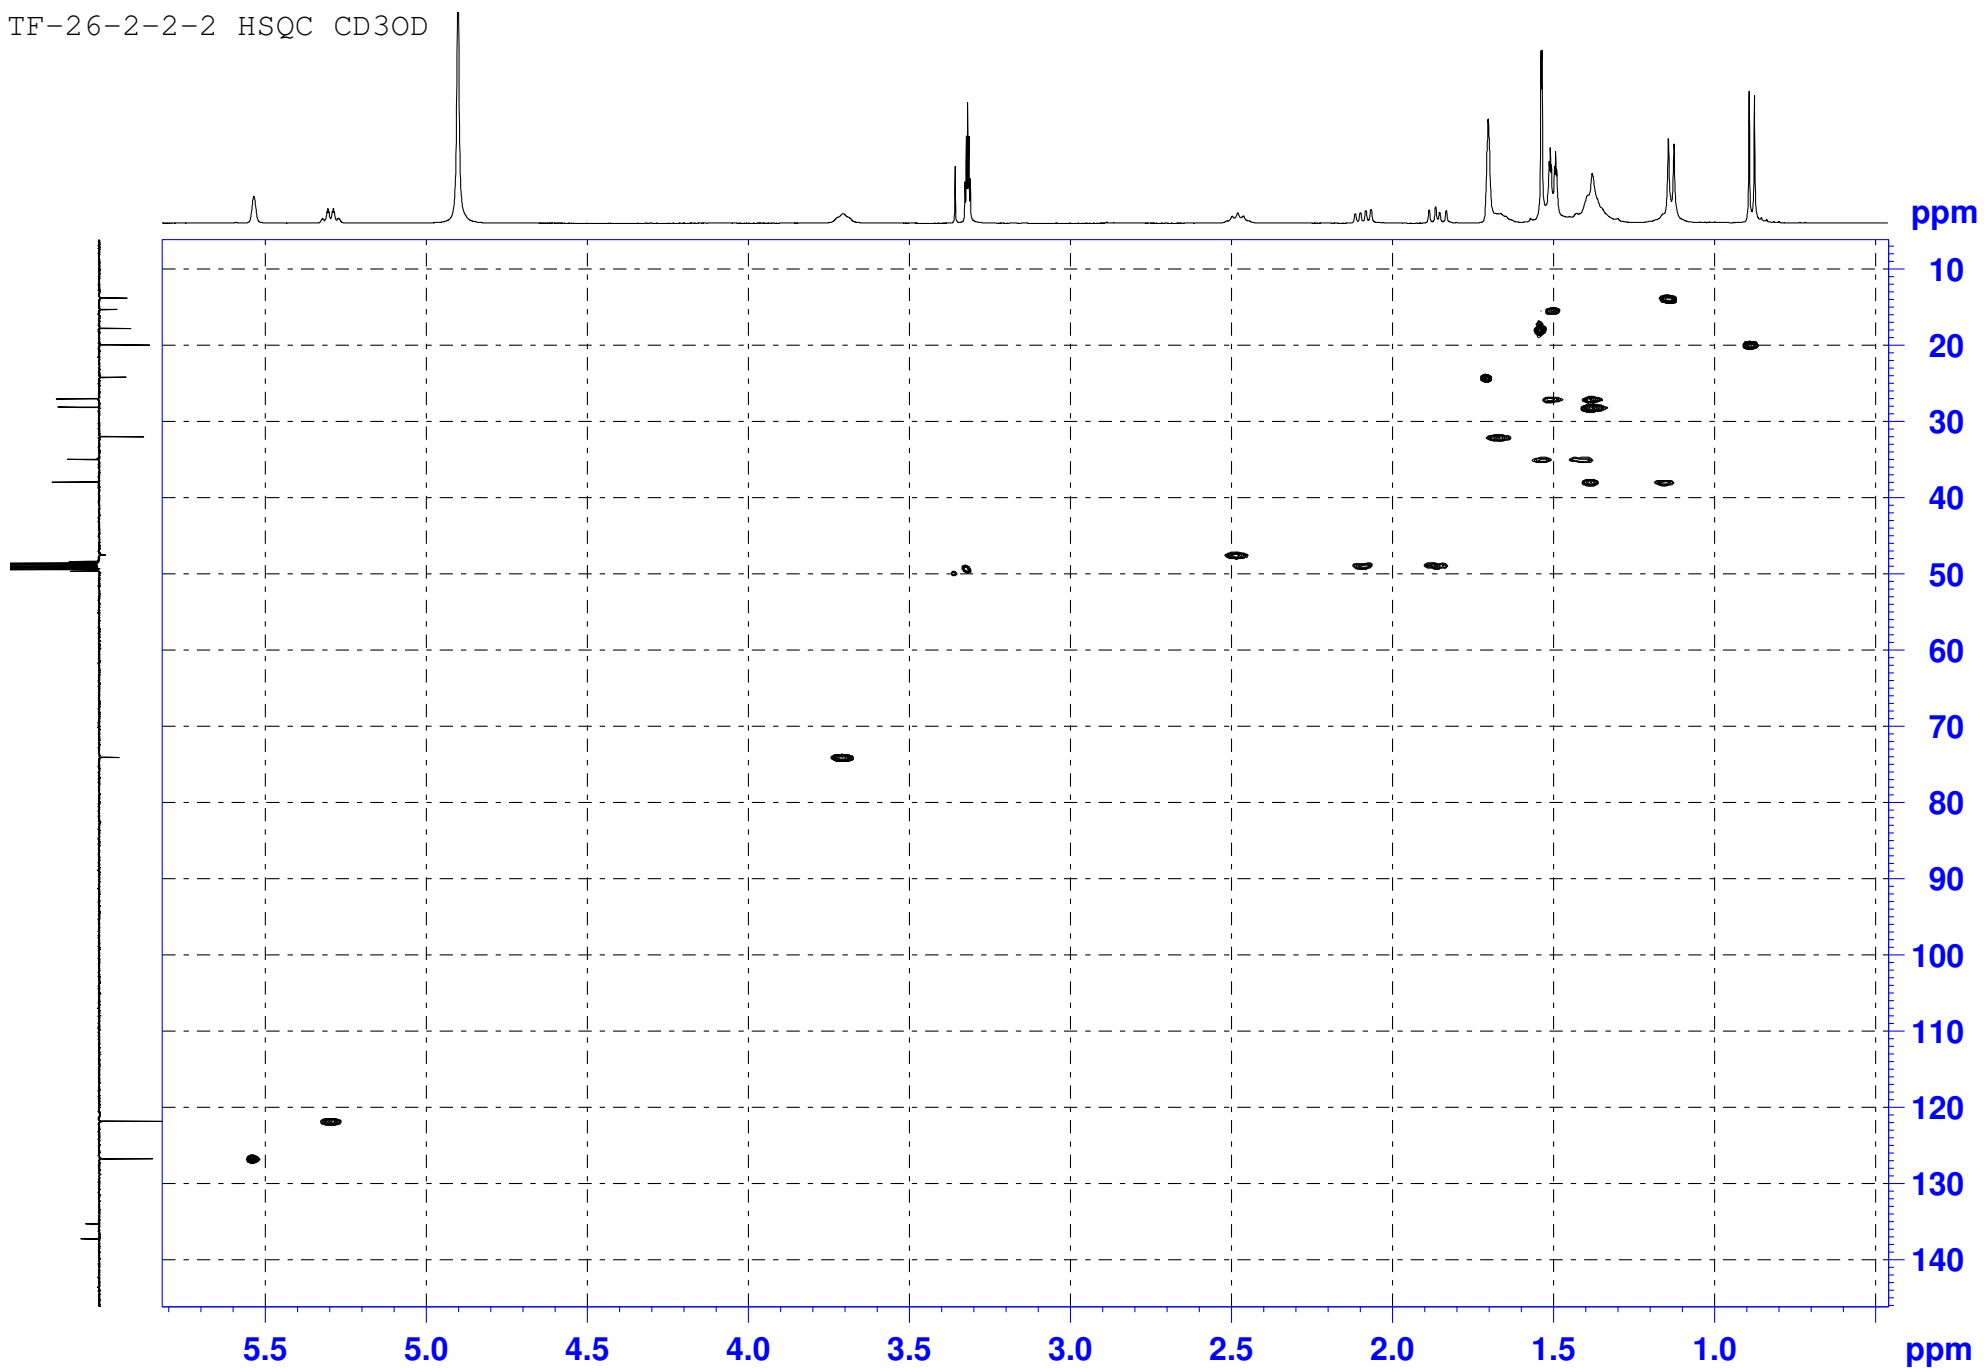

Figure S4-3 HSQC Spectrum of 4 in  $\text{CD}_3\text{OD}$

TF-26-2-2-2 COSY CD3OD

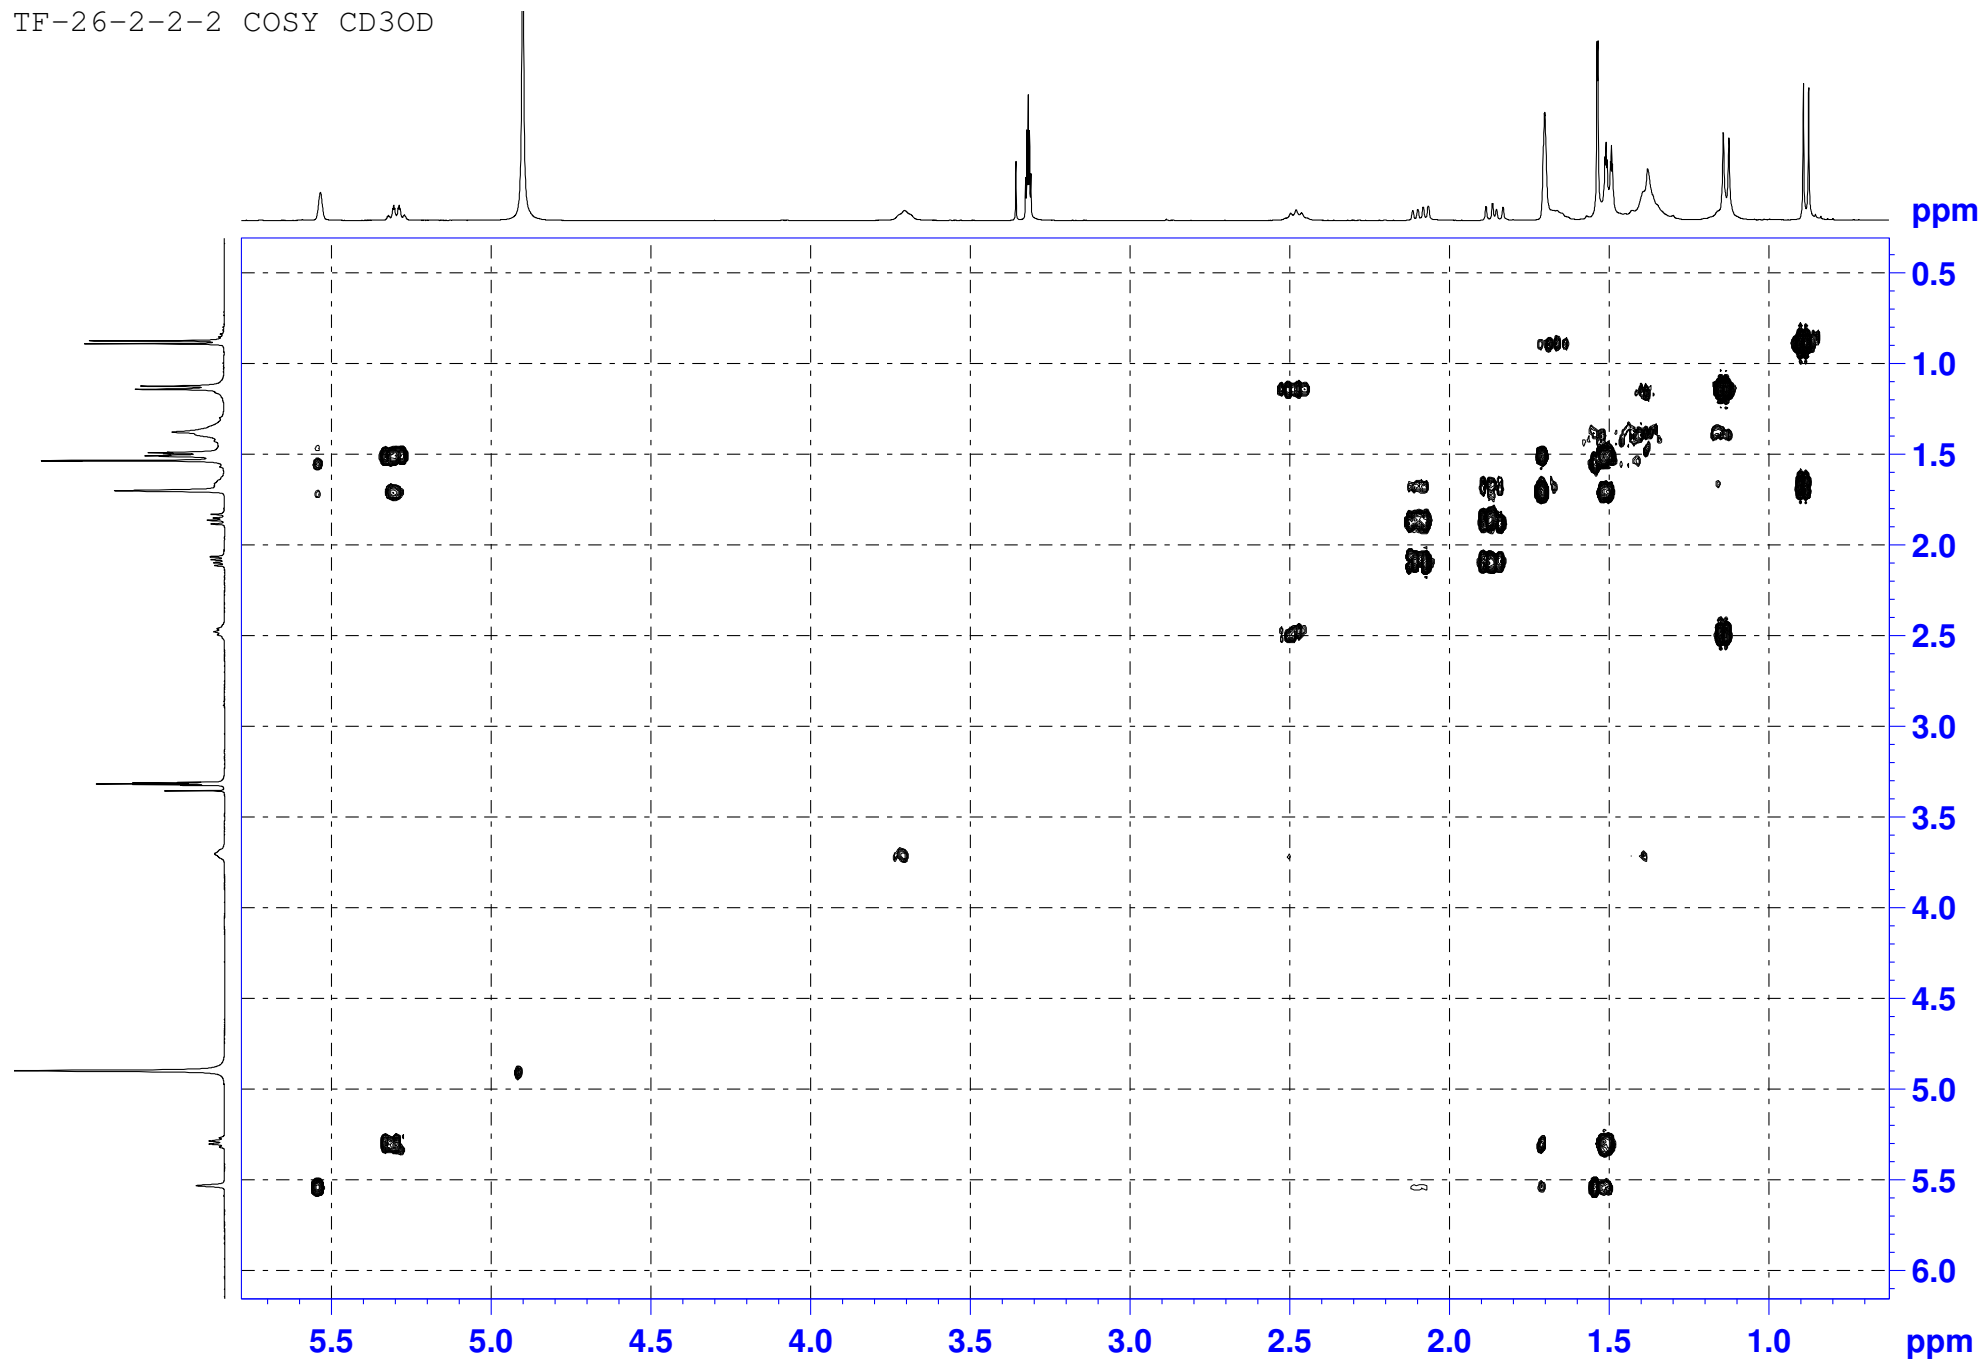

Figure S4-4 COSY Spectrum of 4 in CD<sub>3</sub>OD

TF-26-2-2-2 HMBC CD3OD

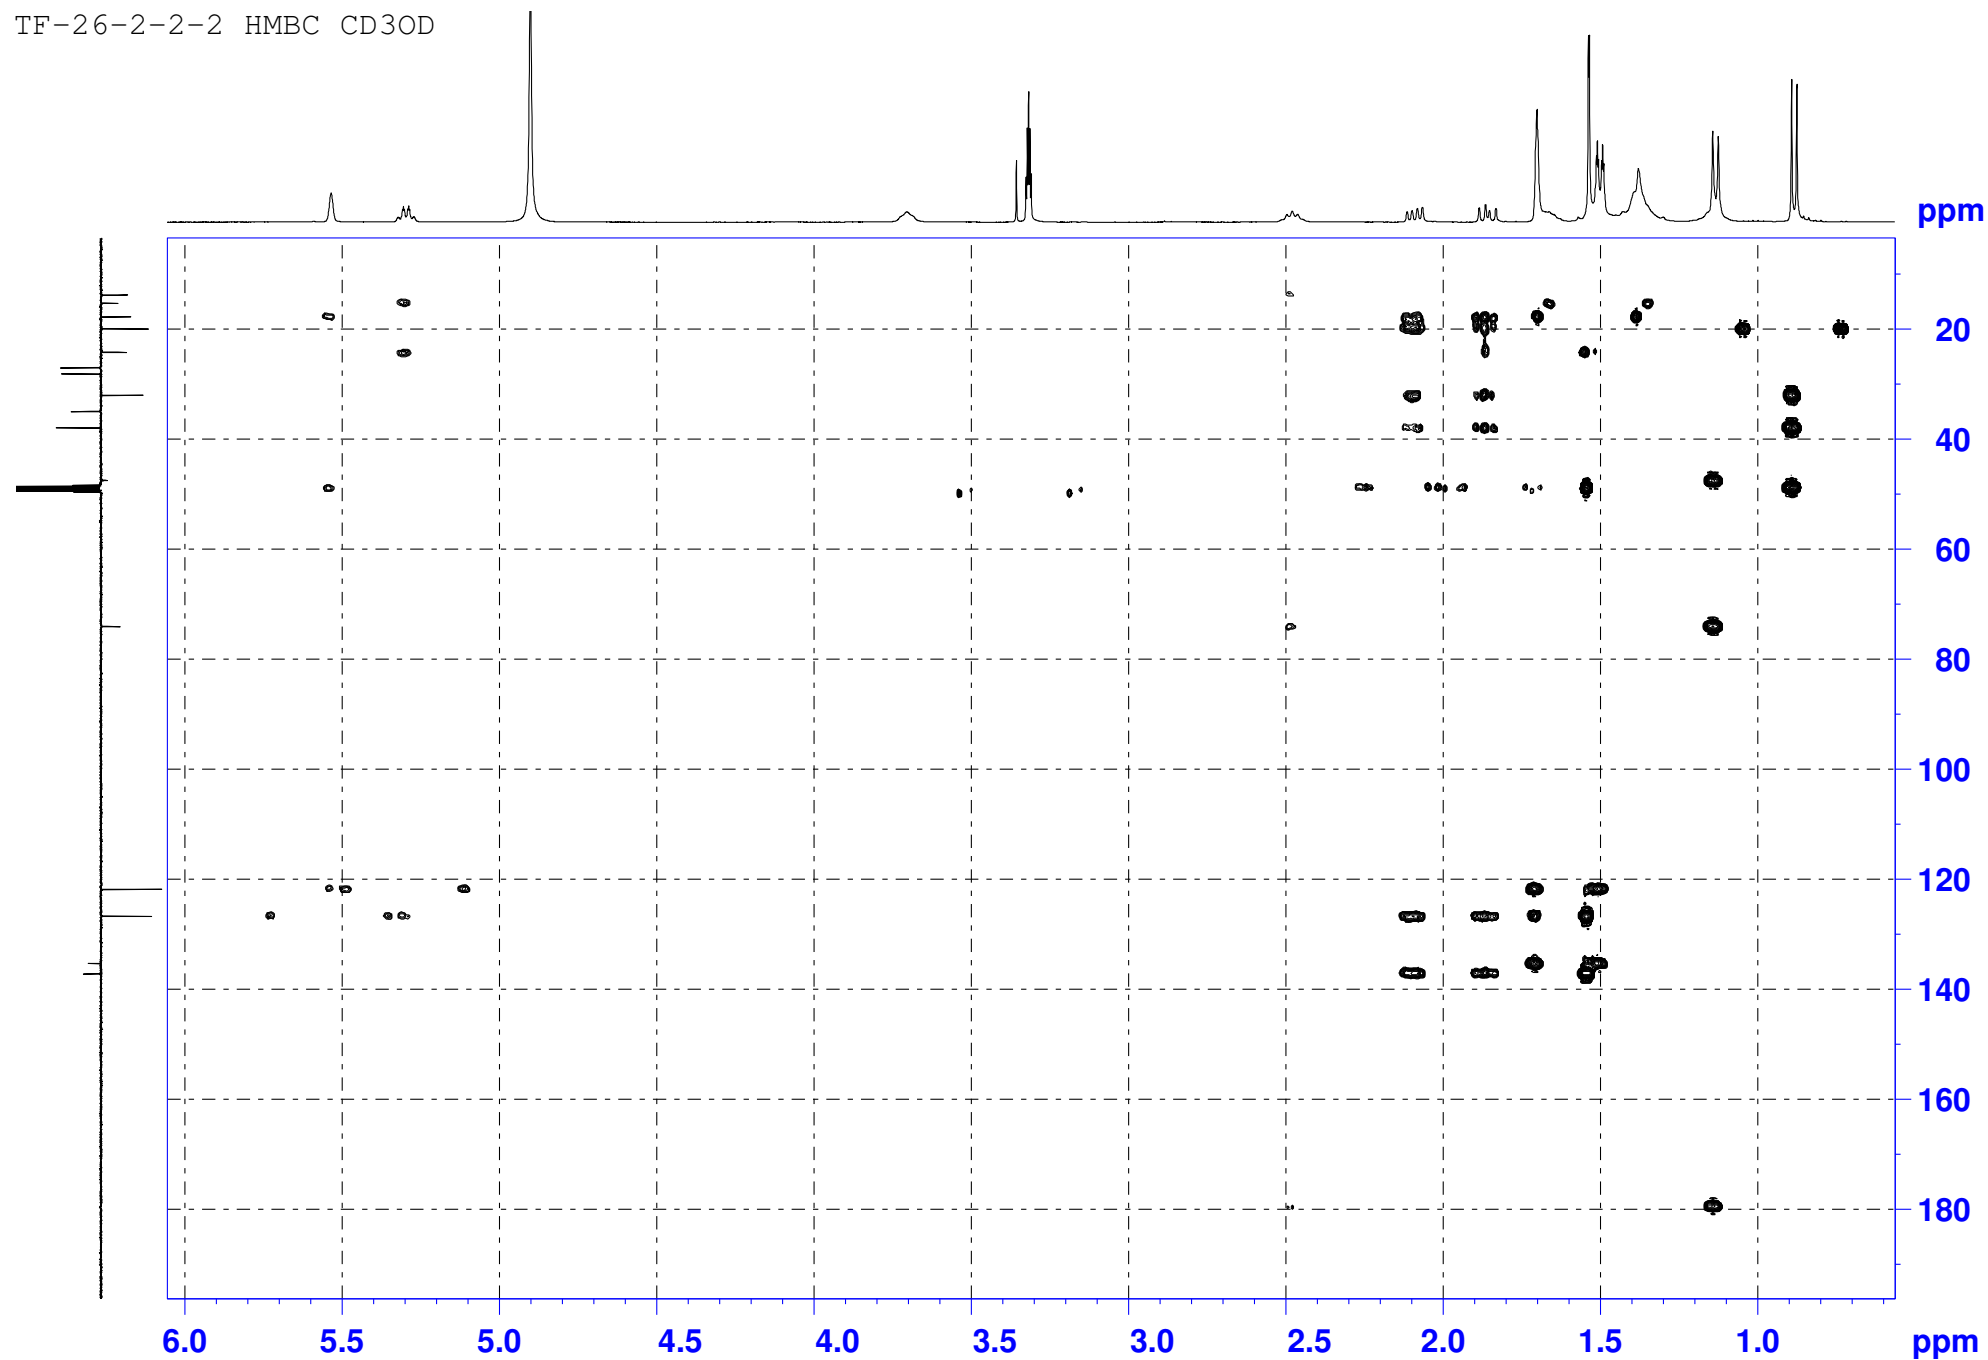

Figure S4-5 HMBC Spectrum of 4 in CD<sub>3</sub>OD

TF-26-2-2-2 NOESY CD3OD

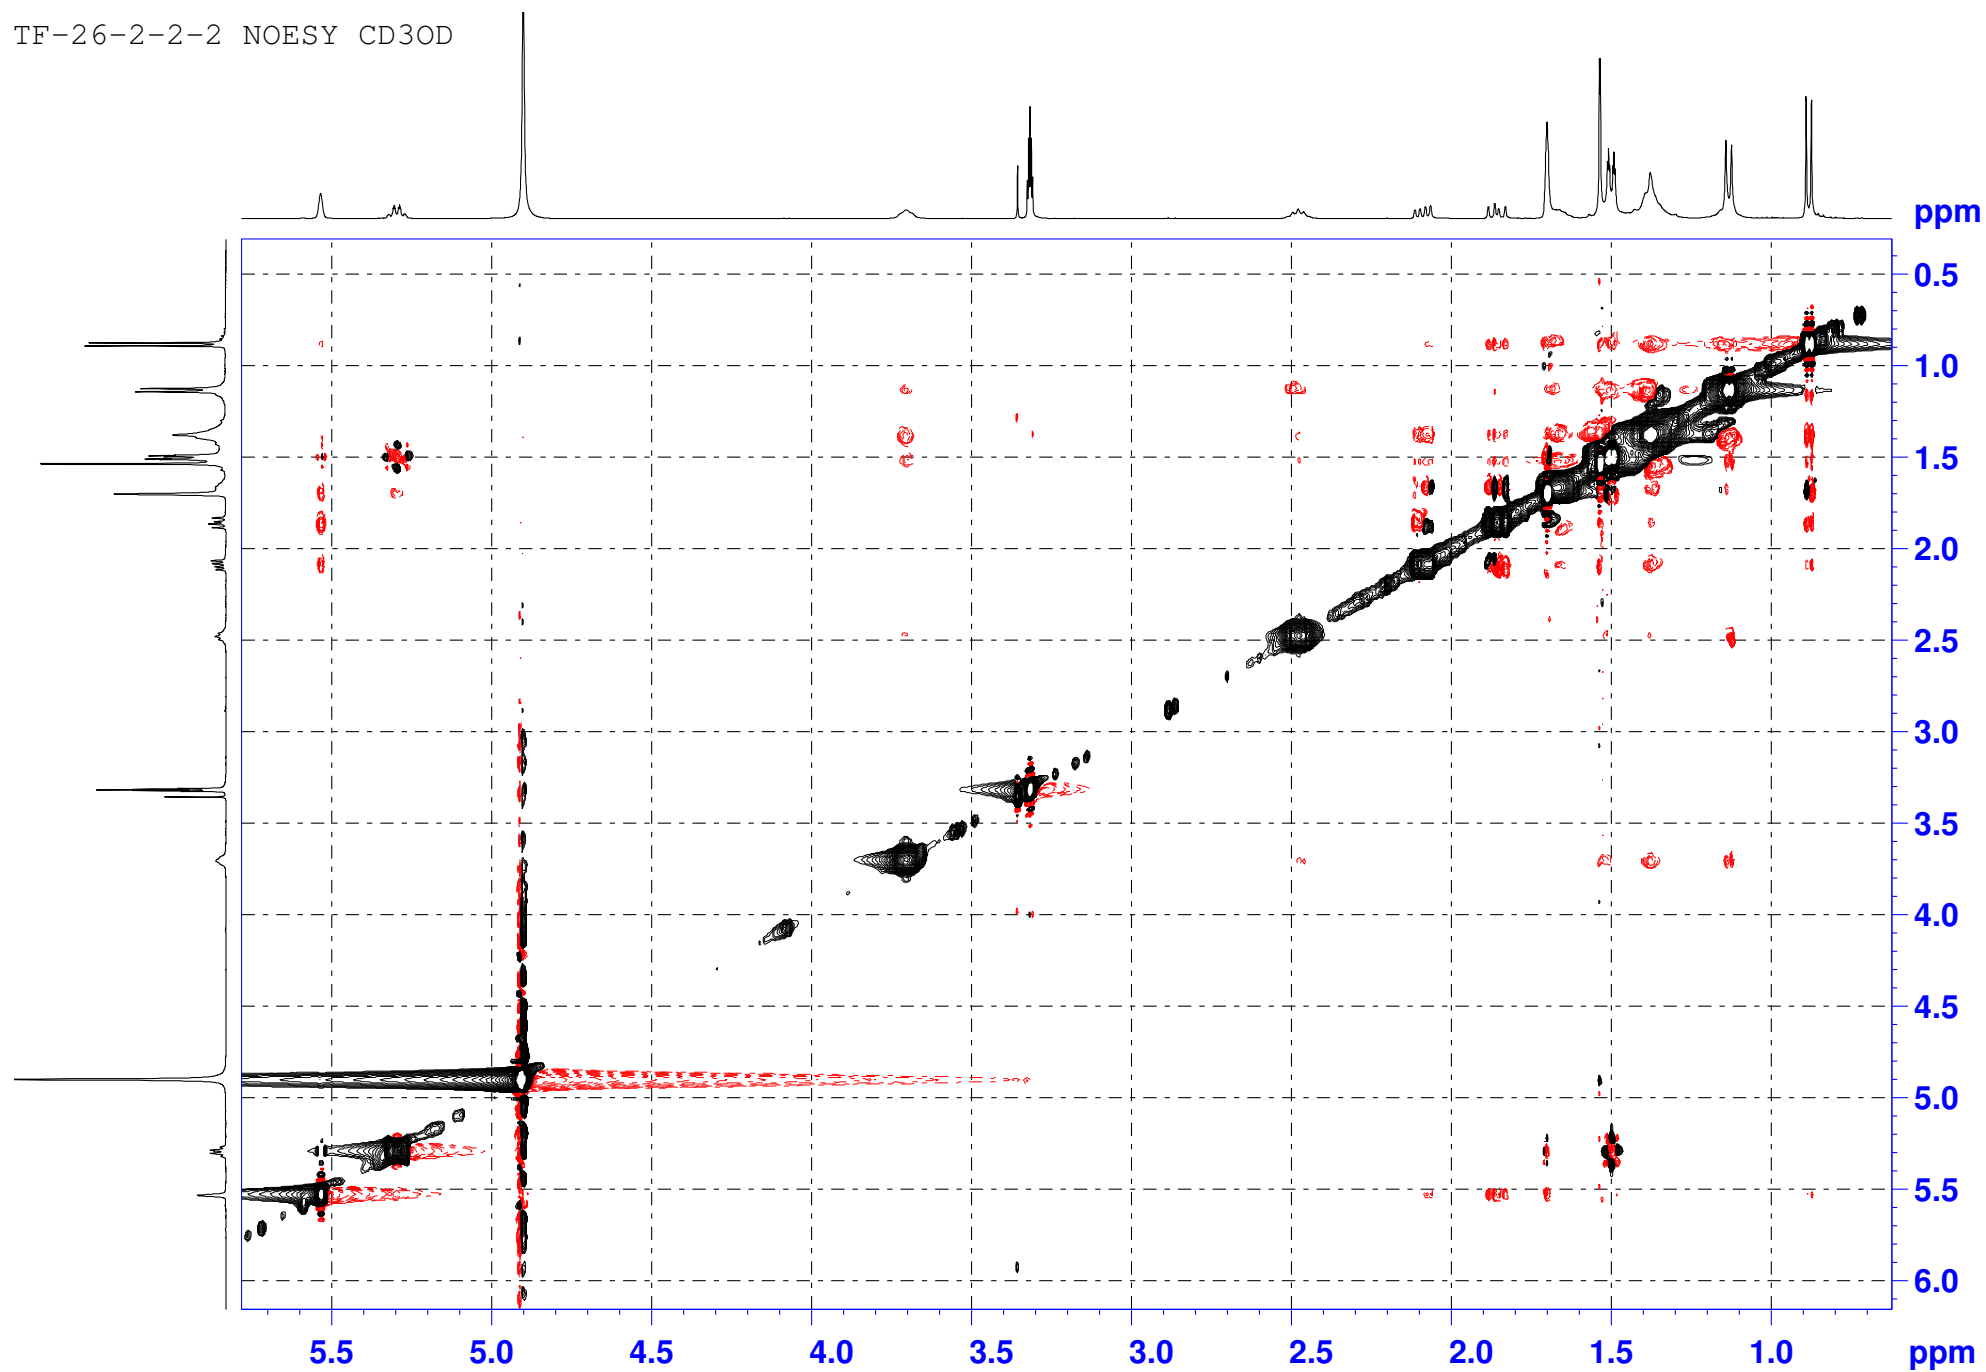

Figure S4-6 NOESY Spectrum of 4 in CD<sub>3</sub>OD

TF-14-1-3-1-2 1H NMR CDCl3 400 MHz

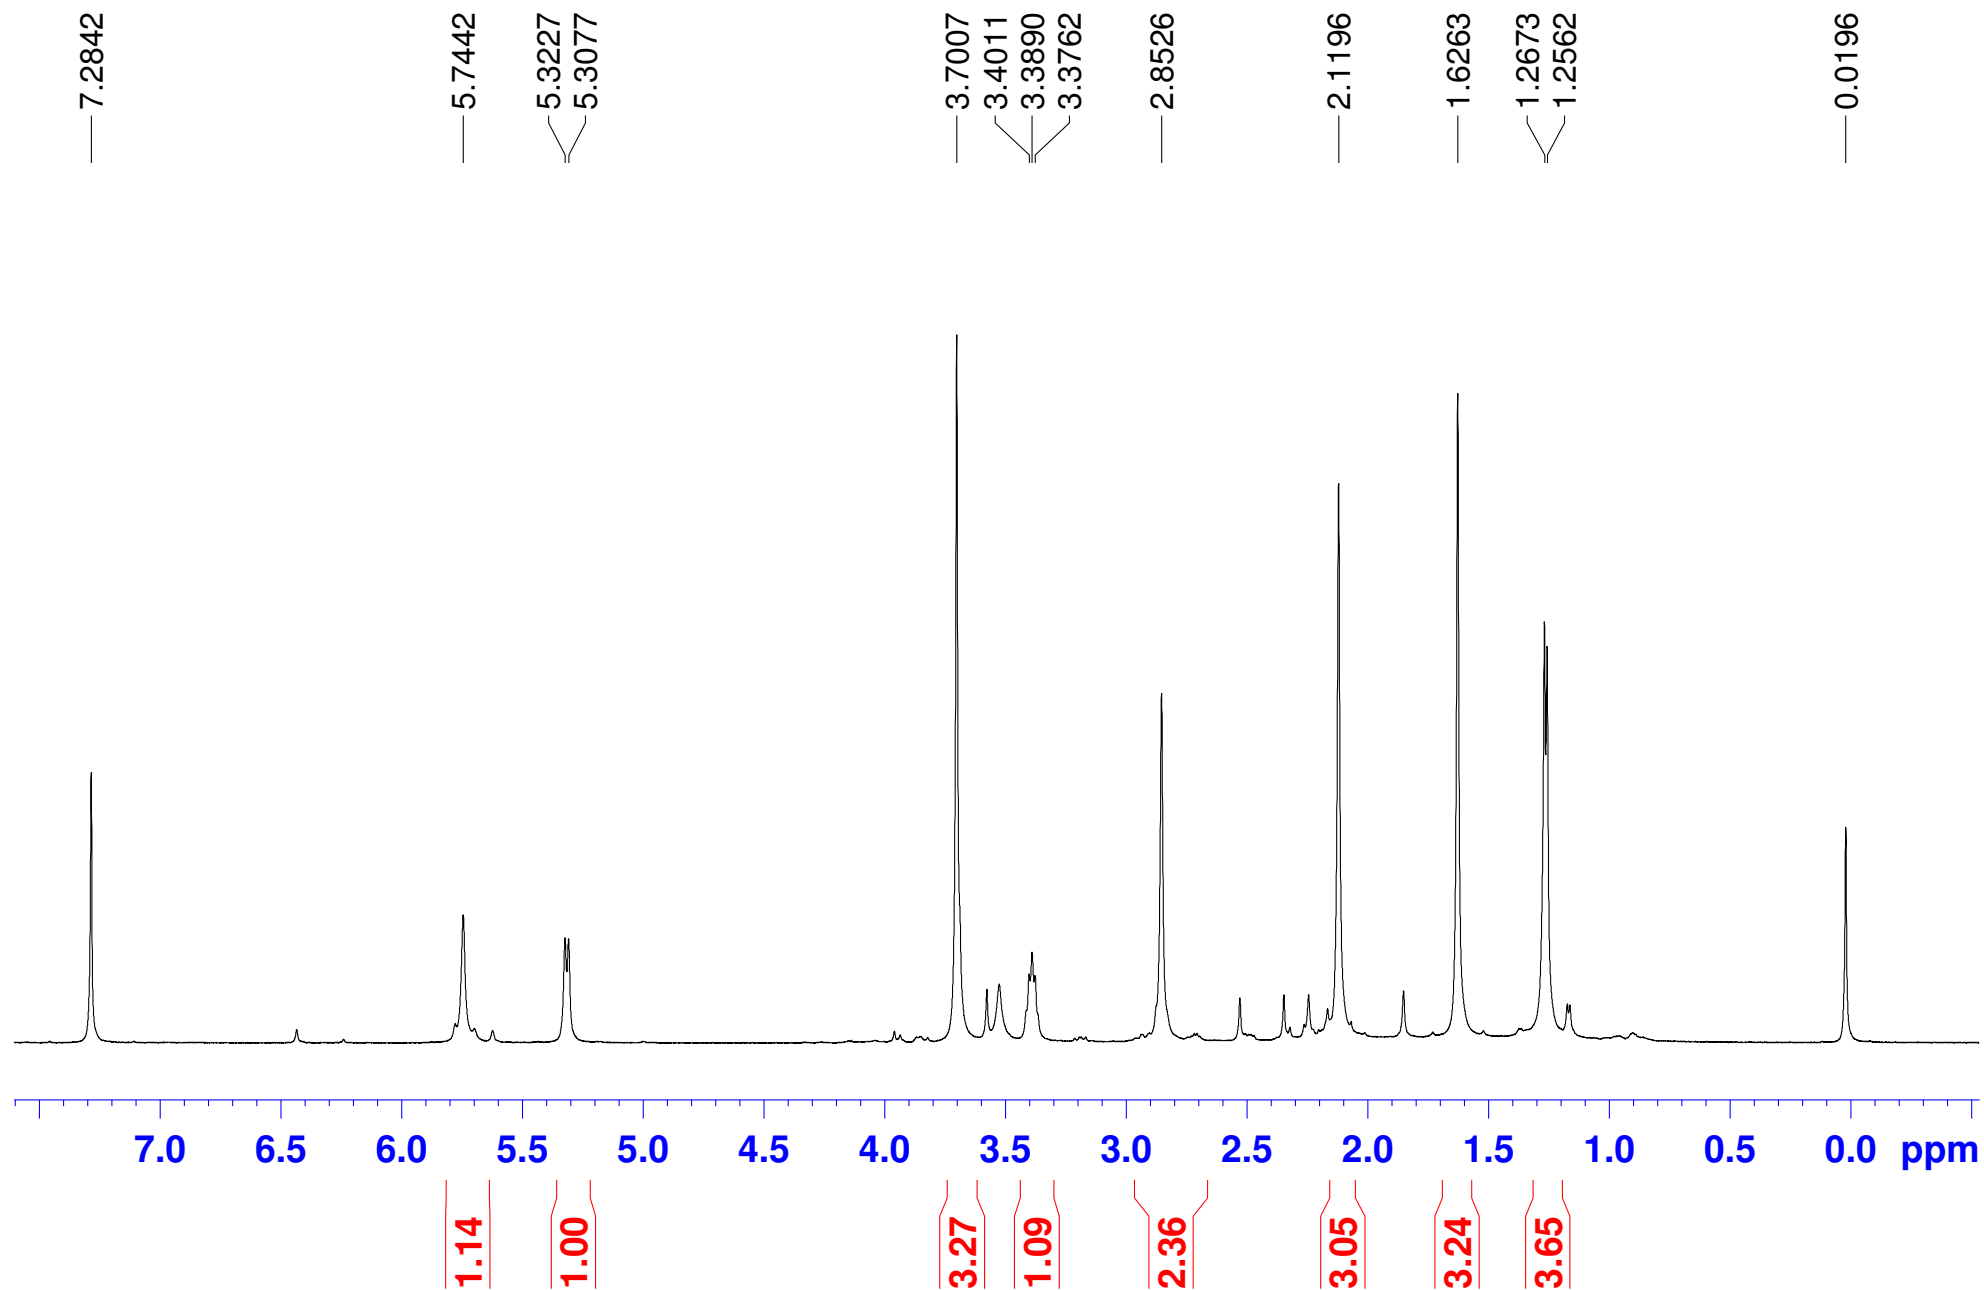

Figure S5-1 <sup>1</sup>H NMR Spectrum of 5 in CDCl<sub>3</sub> (400 MHz)

TF-14-1-3-1-2 <sup>13</sup>C NMR CDCl<sub>3</sub> 100 MHz

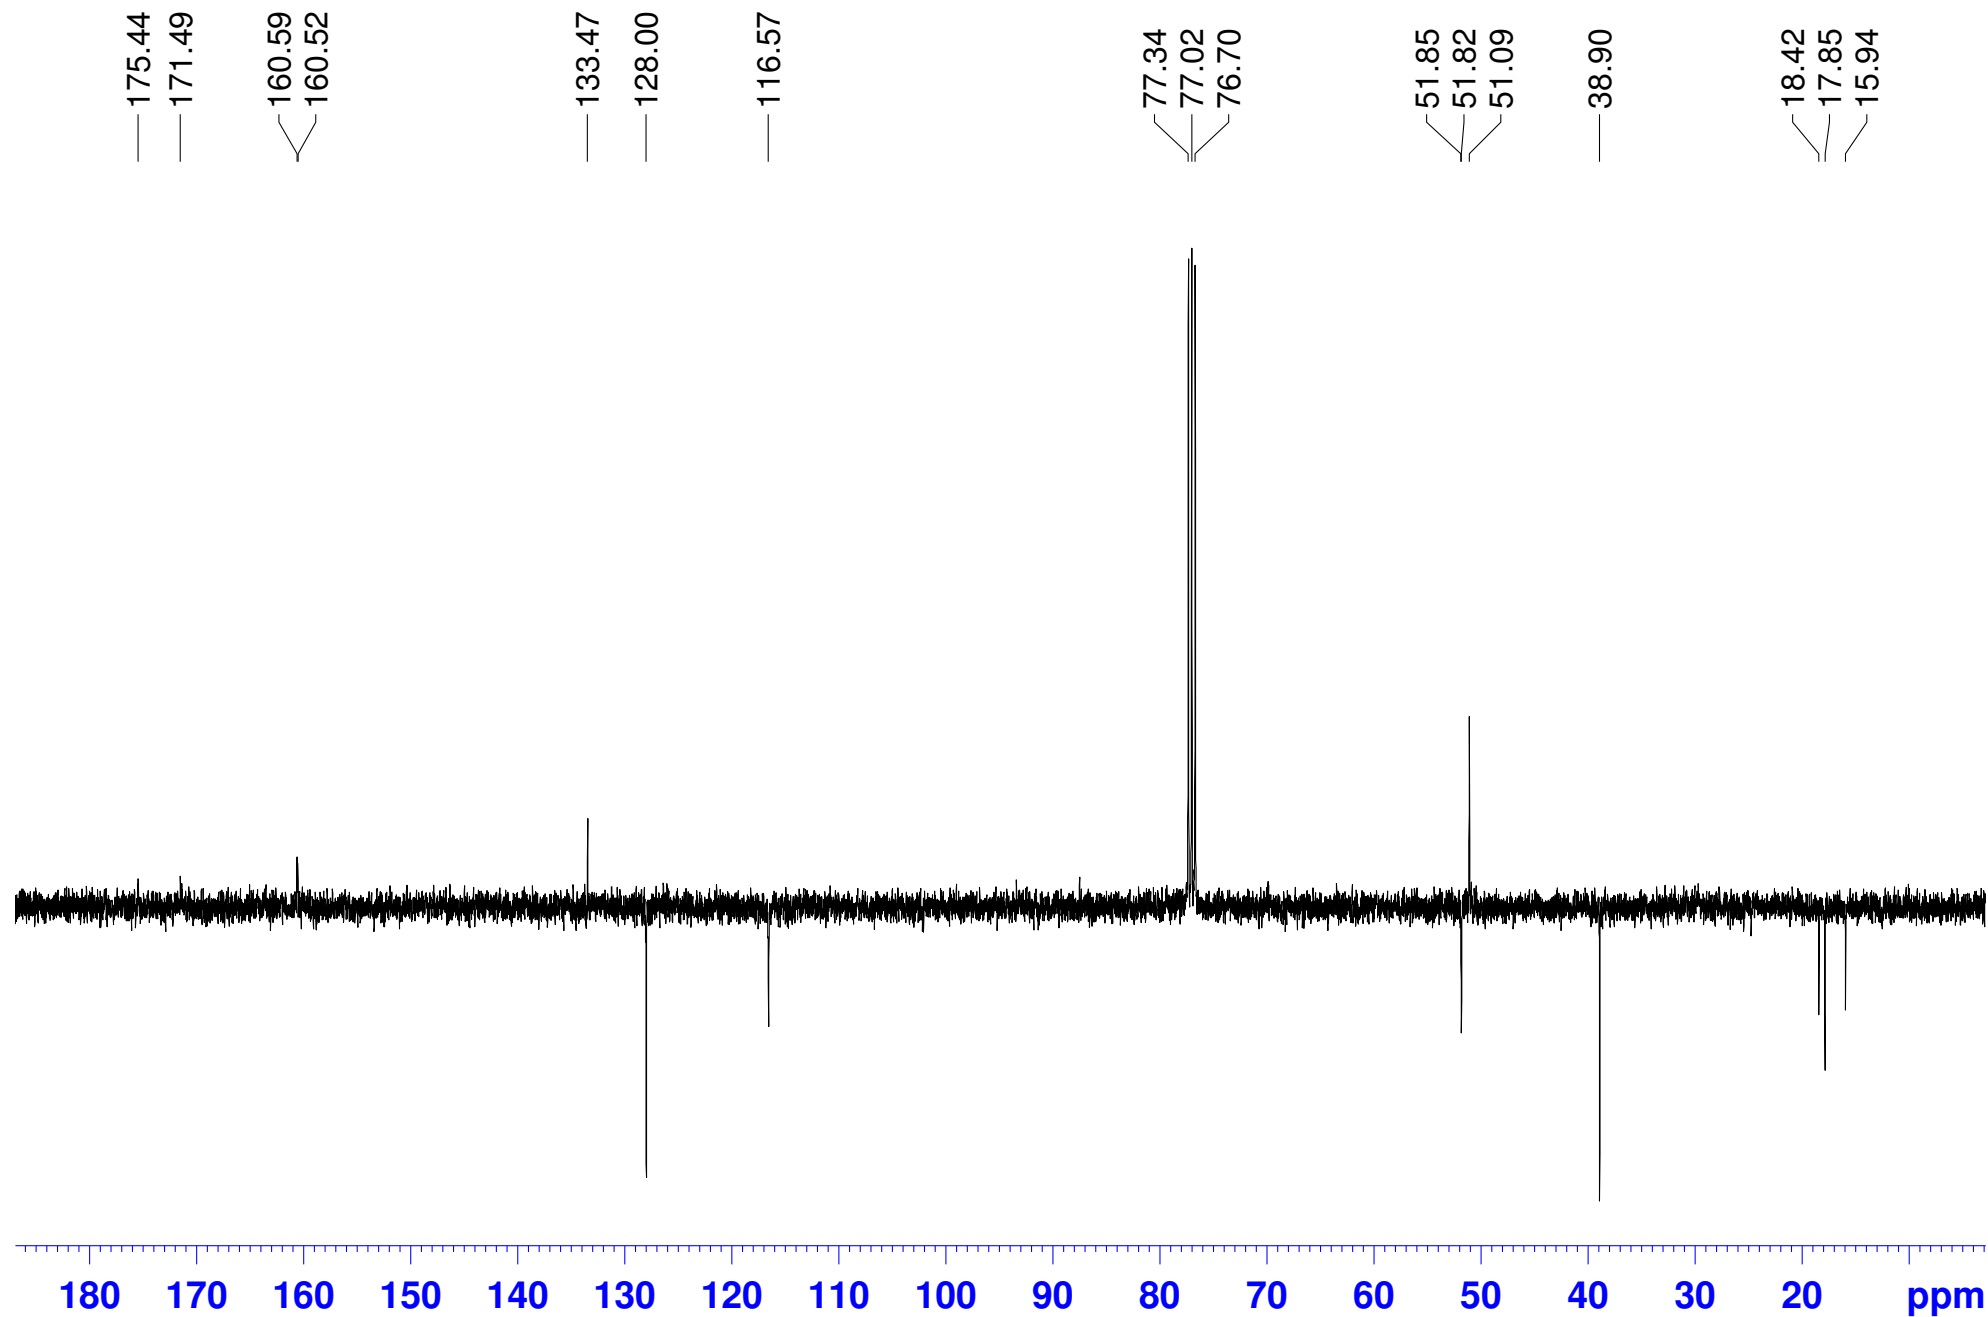

Figure S5-2 <sup>13</sup>C Spectrum of **5** in CDCl<sub>3</sub> (100 MHz)



TF-14-1-3-1-2 HSQC CDC13

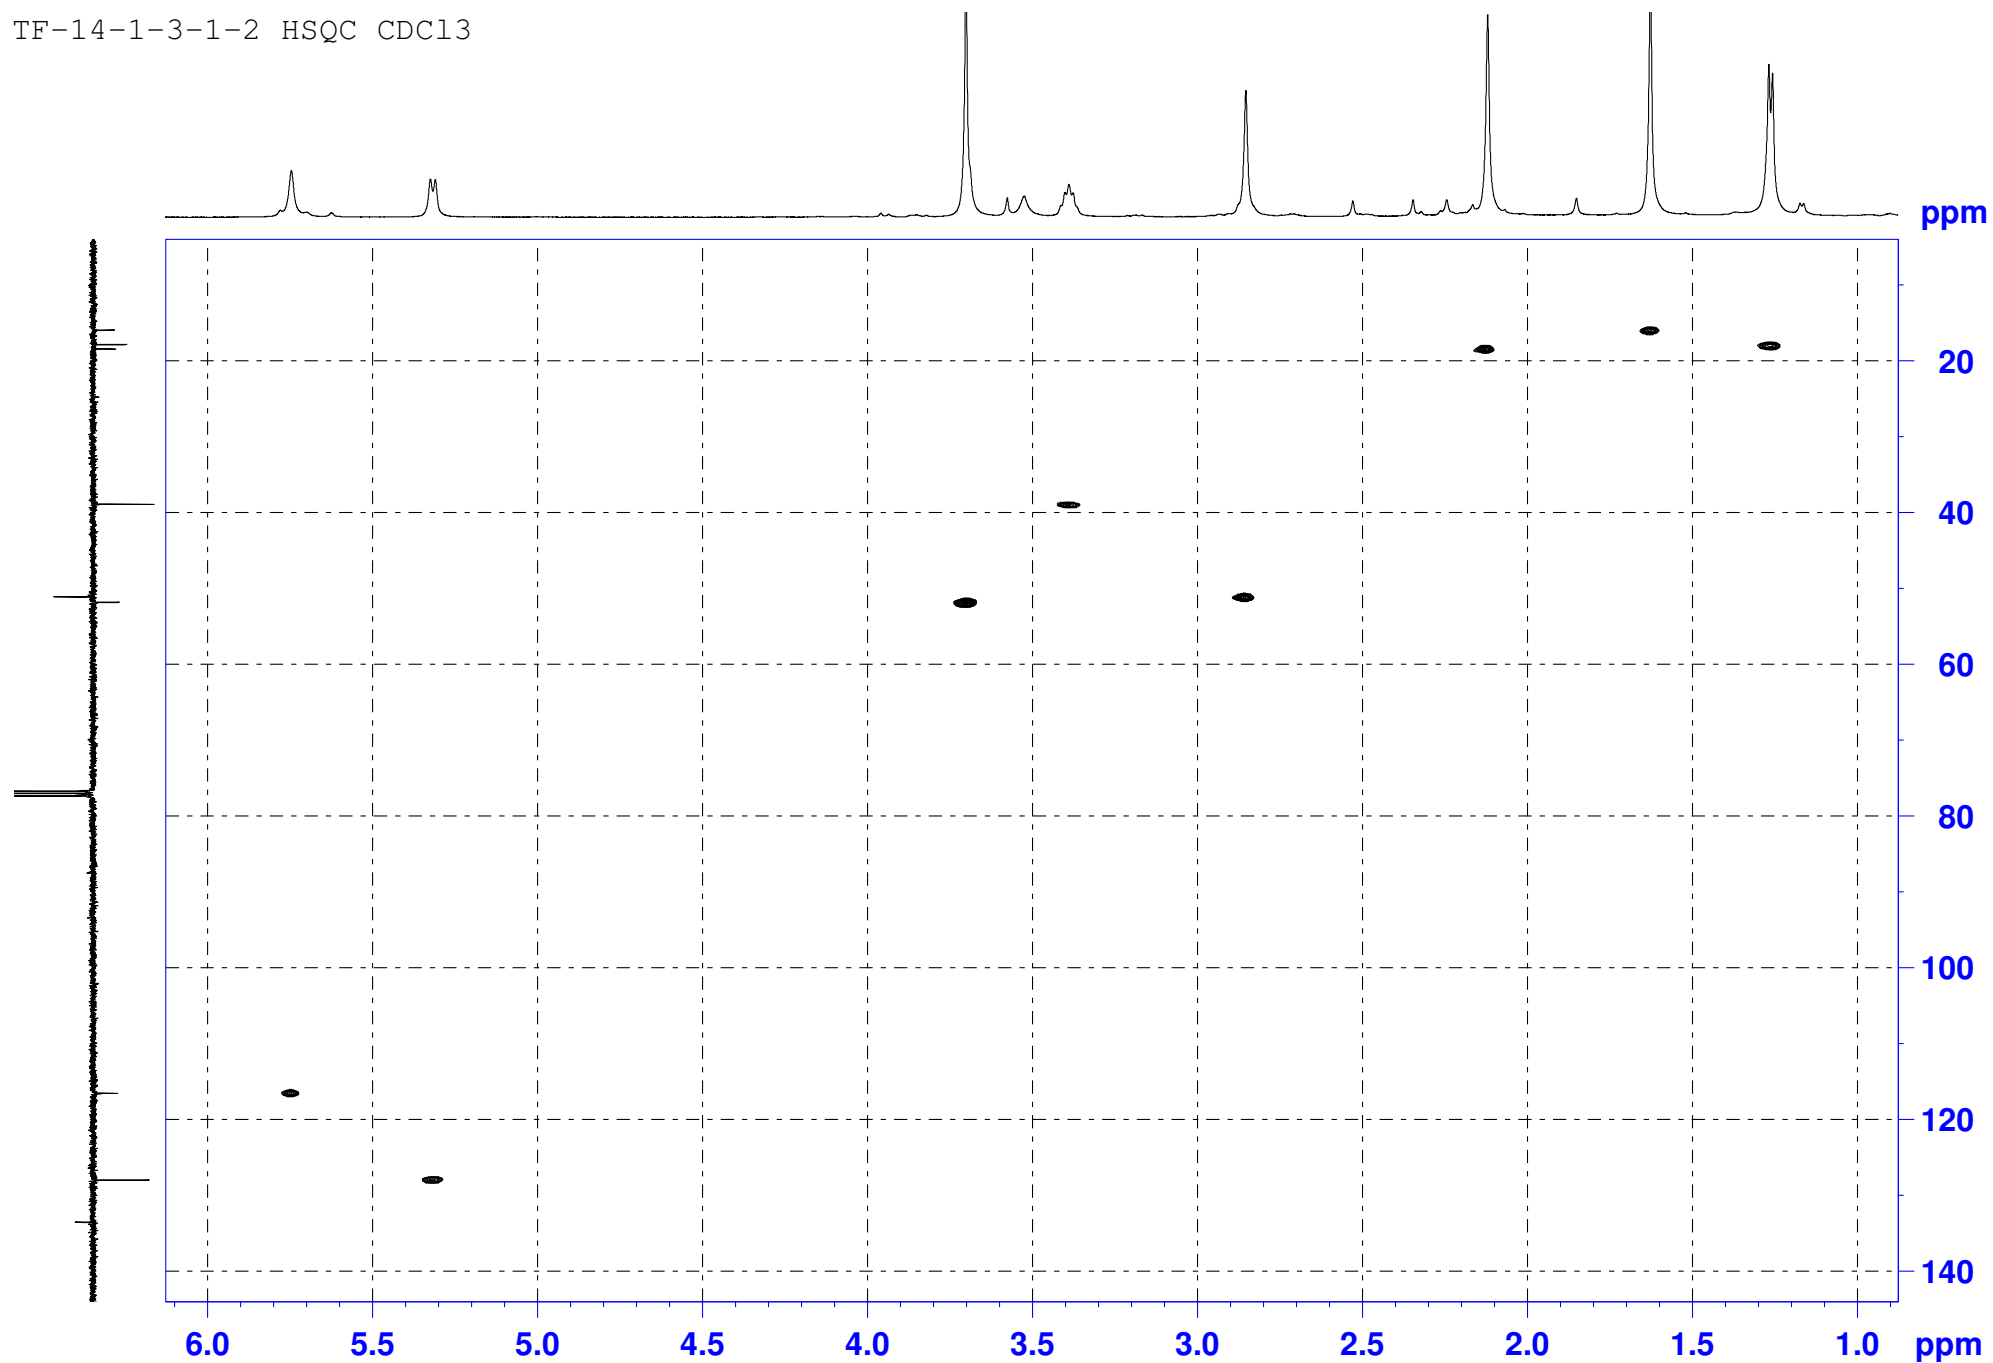

Figure S5-3 HSQC Spectrum of **5** in  $\text{CDCl}_3$

TF-14-1-3-1-2 COSY CDC13

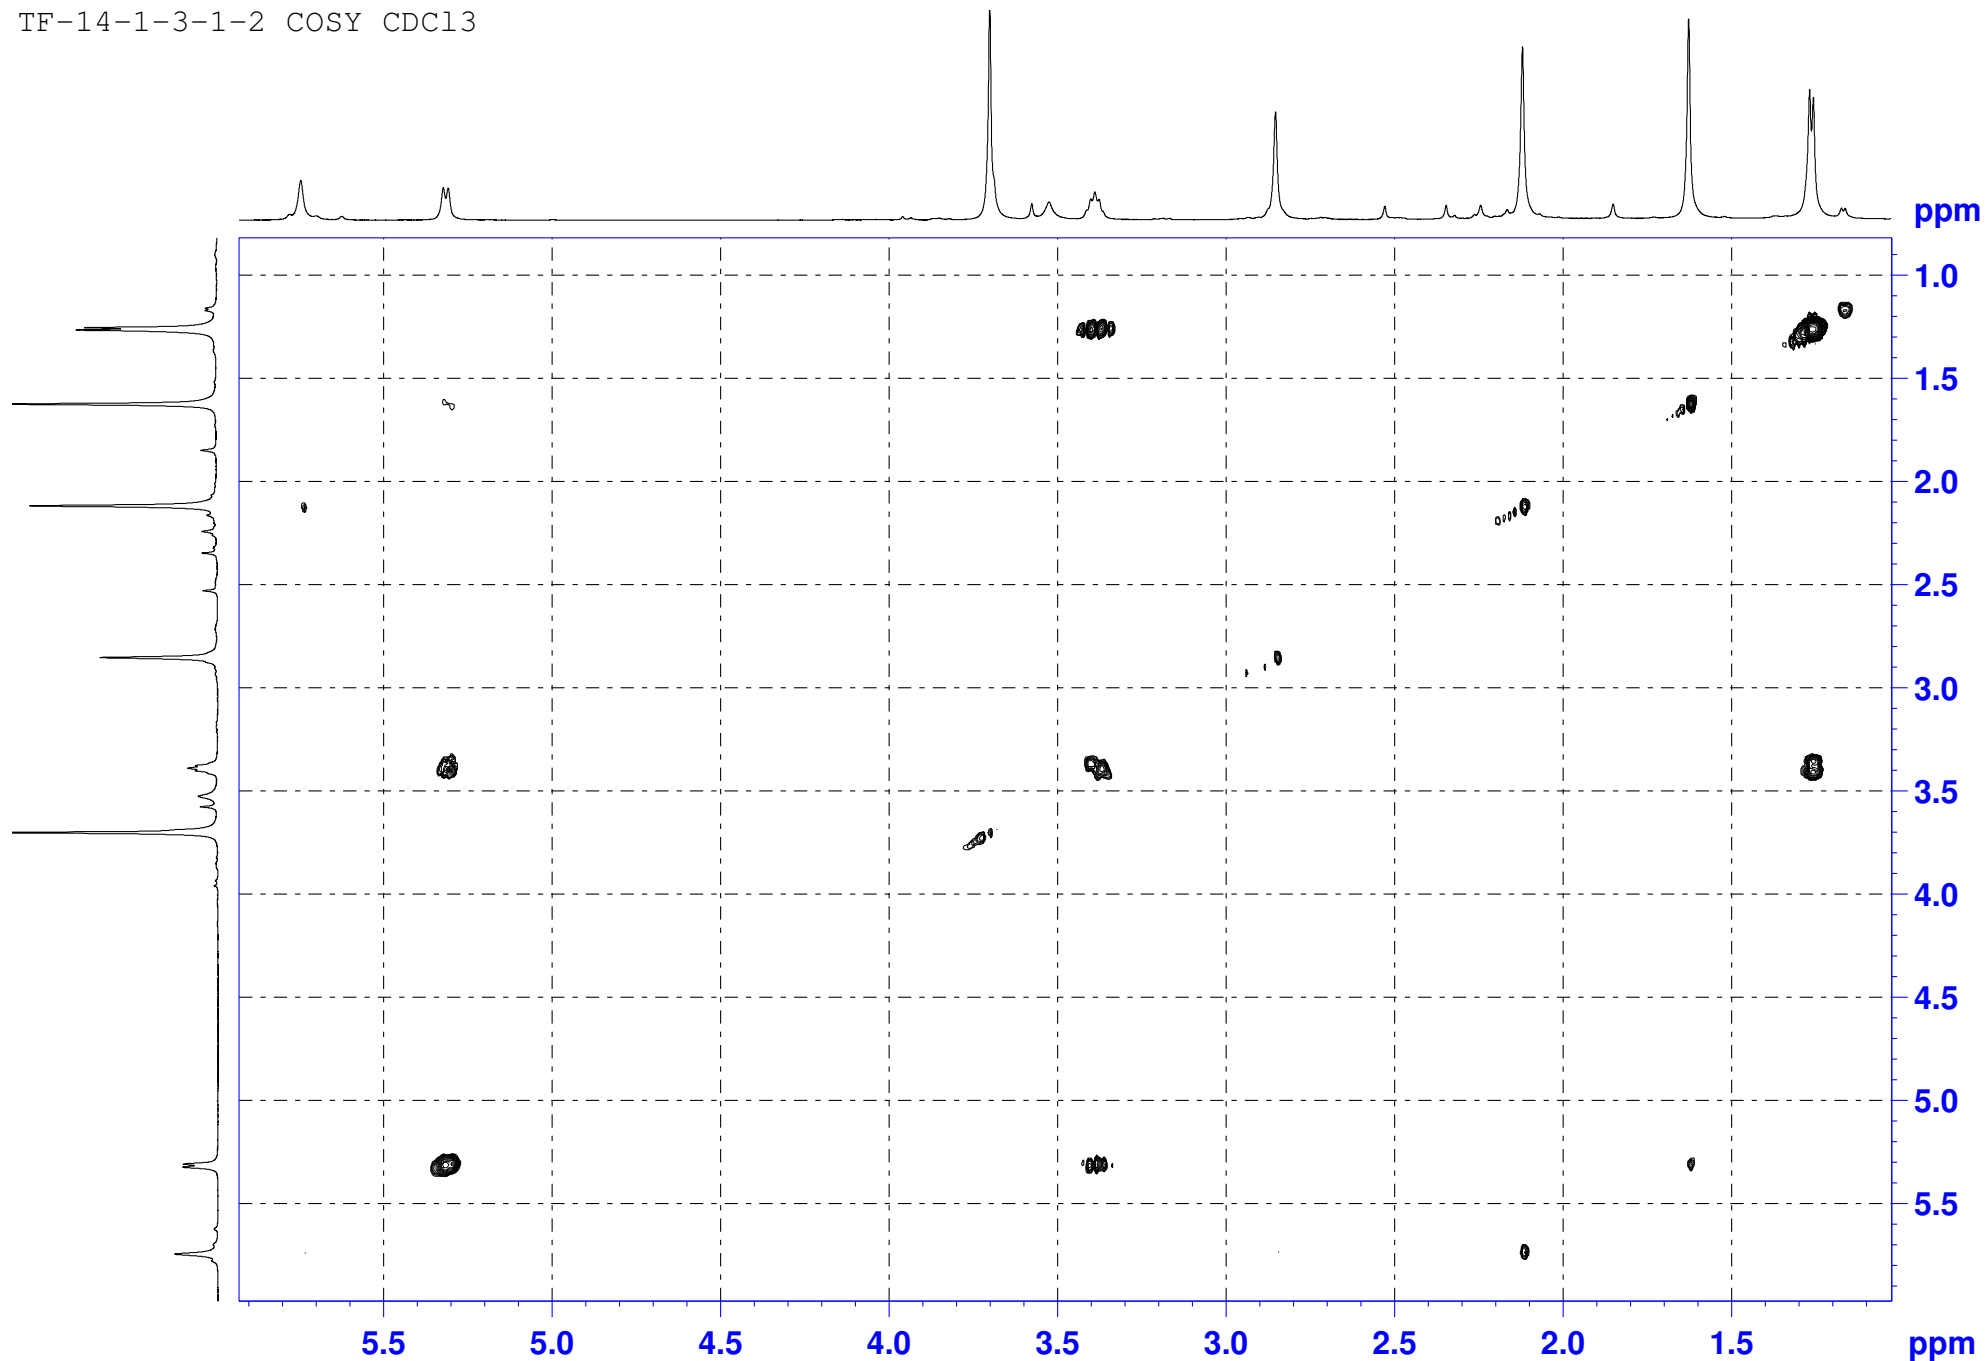

Figure S5-4 COSY Spectrum of 5 in CDCl<sub>3</sub>

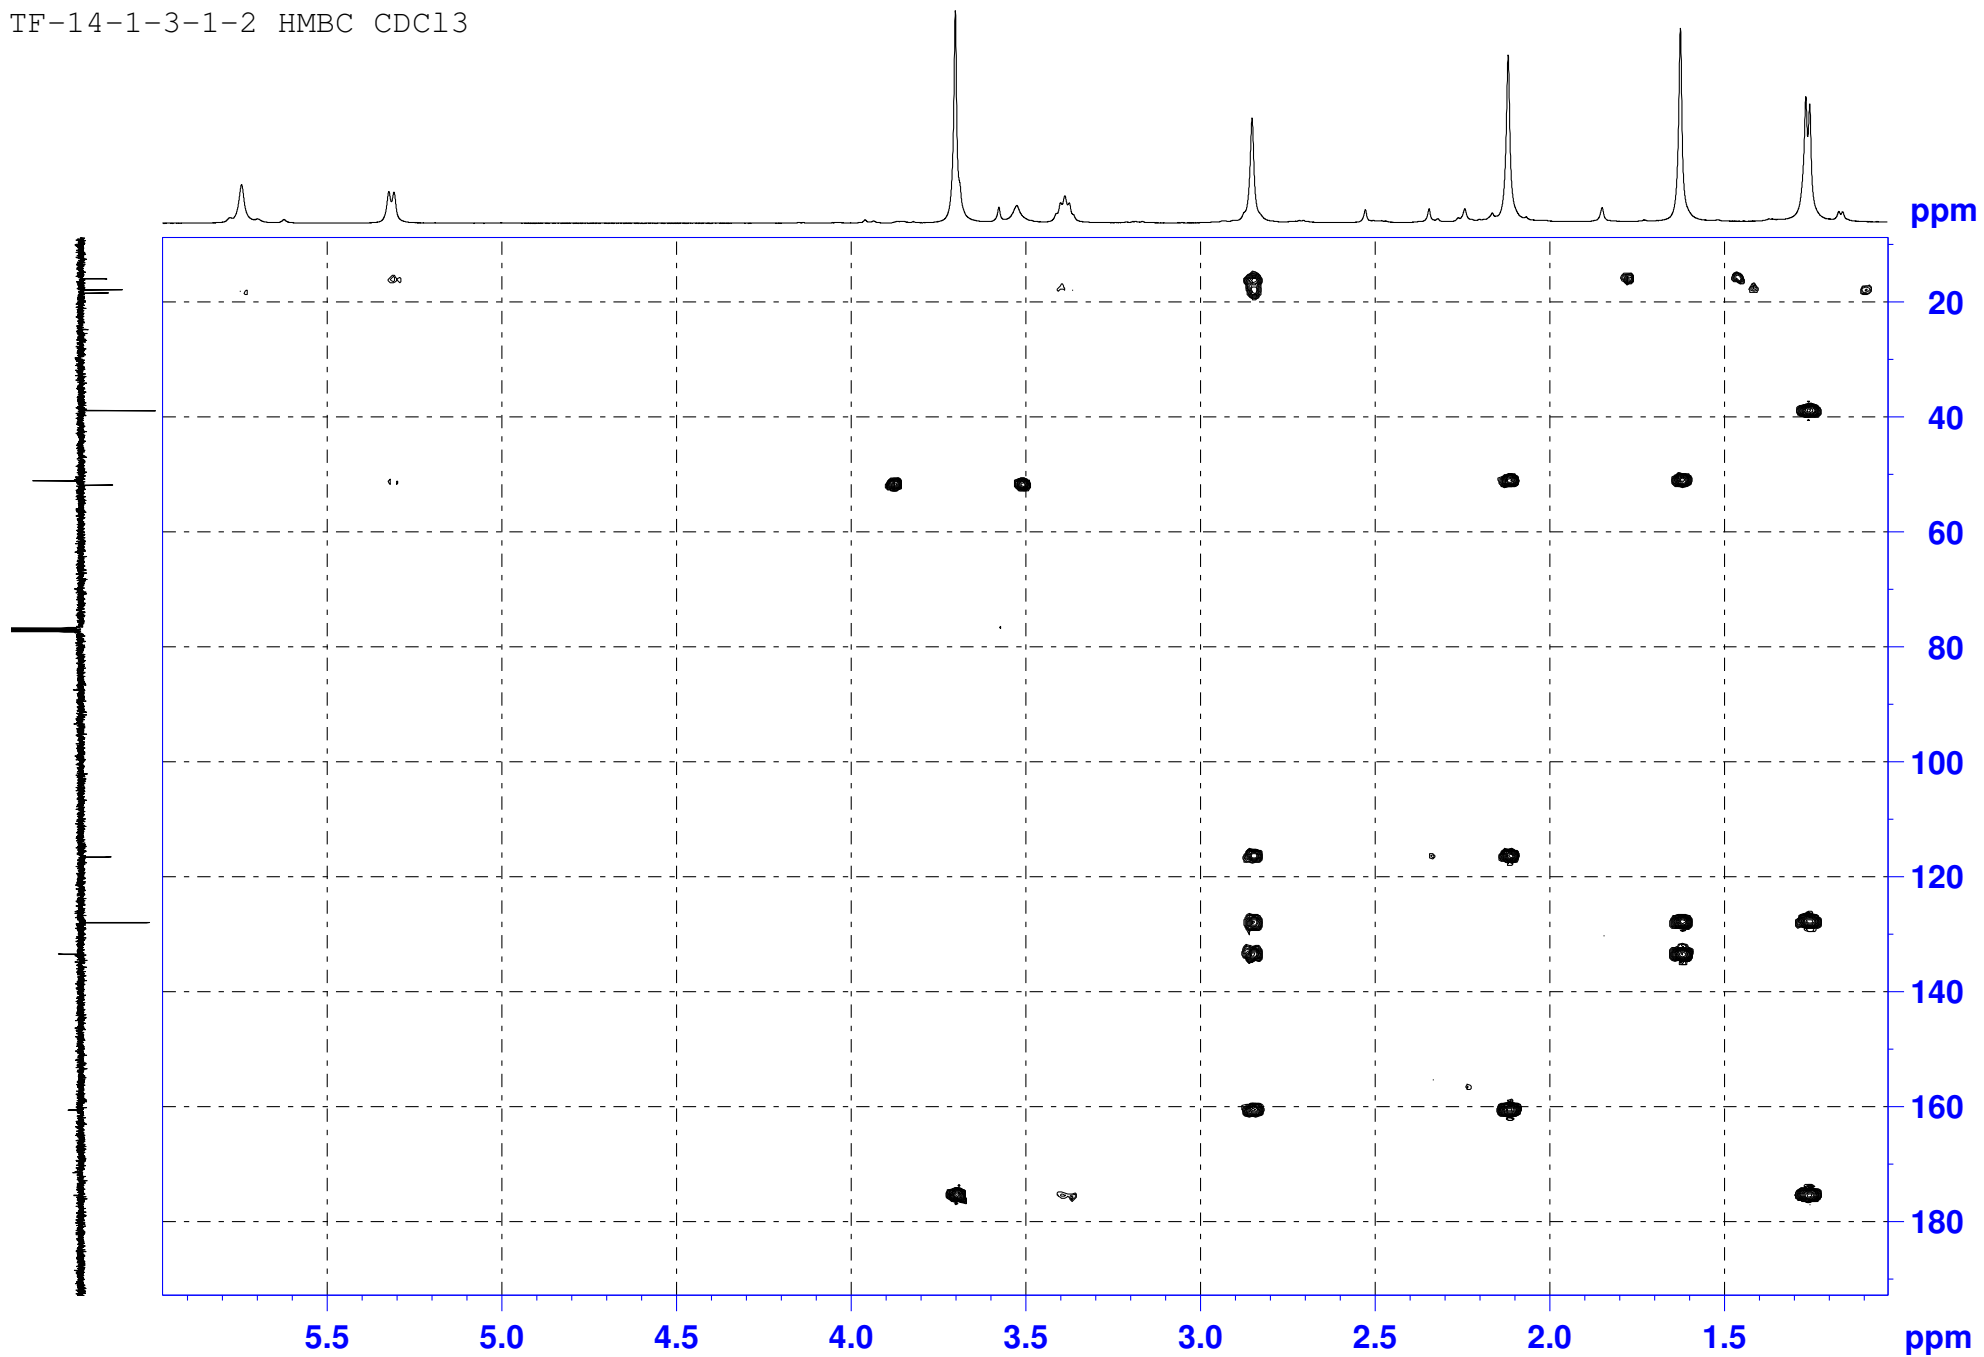

Figure S5-5 HMBC Spectrum of 5 in CDCl<sub>3</sub>

TF-14-1-3-1-2 NOESY CDC13

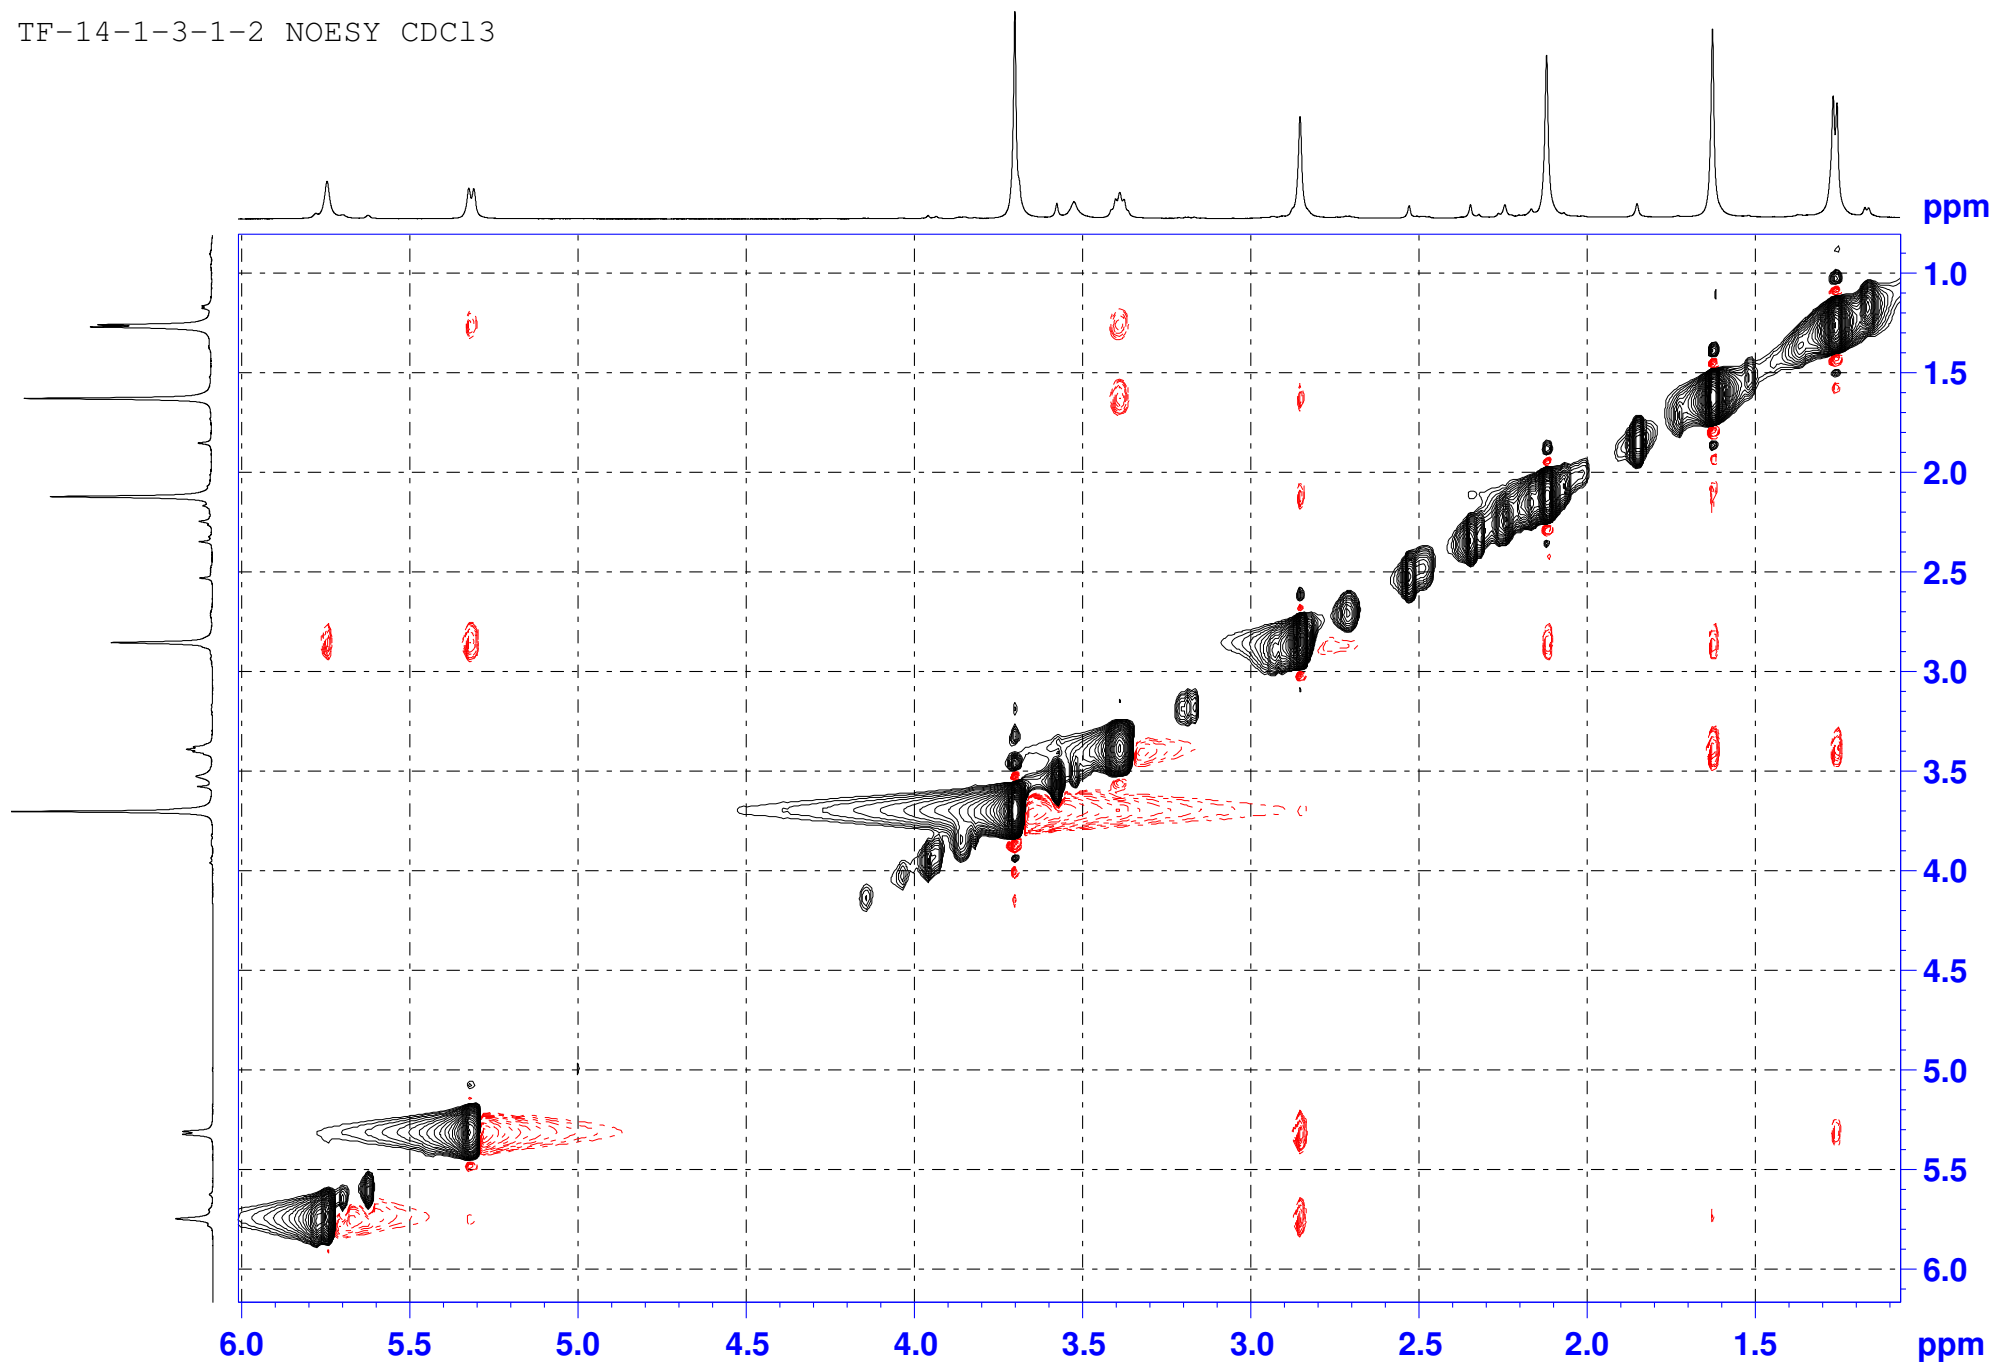

Figure S5-6 NOESY Spectrum of **5** in CDCl<sub>3</sub>

TF-18-1-1 1H NMR CD3OD 400 MHz

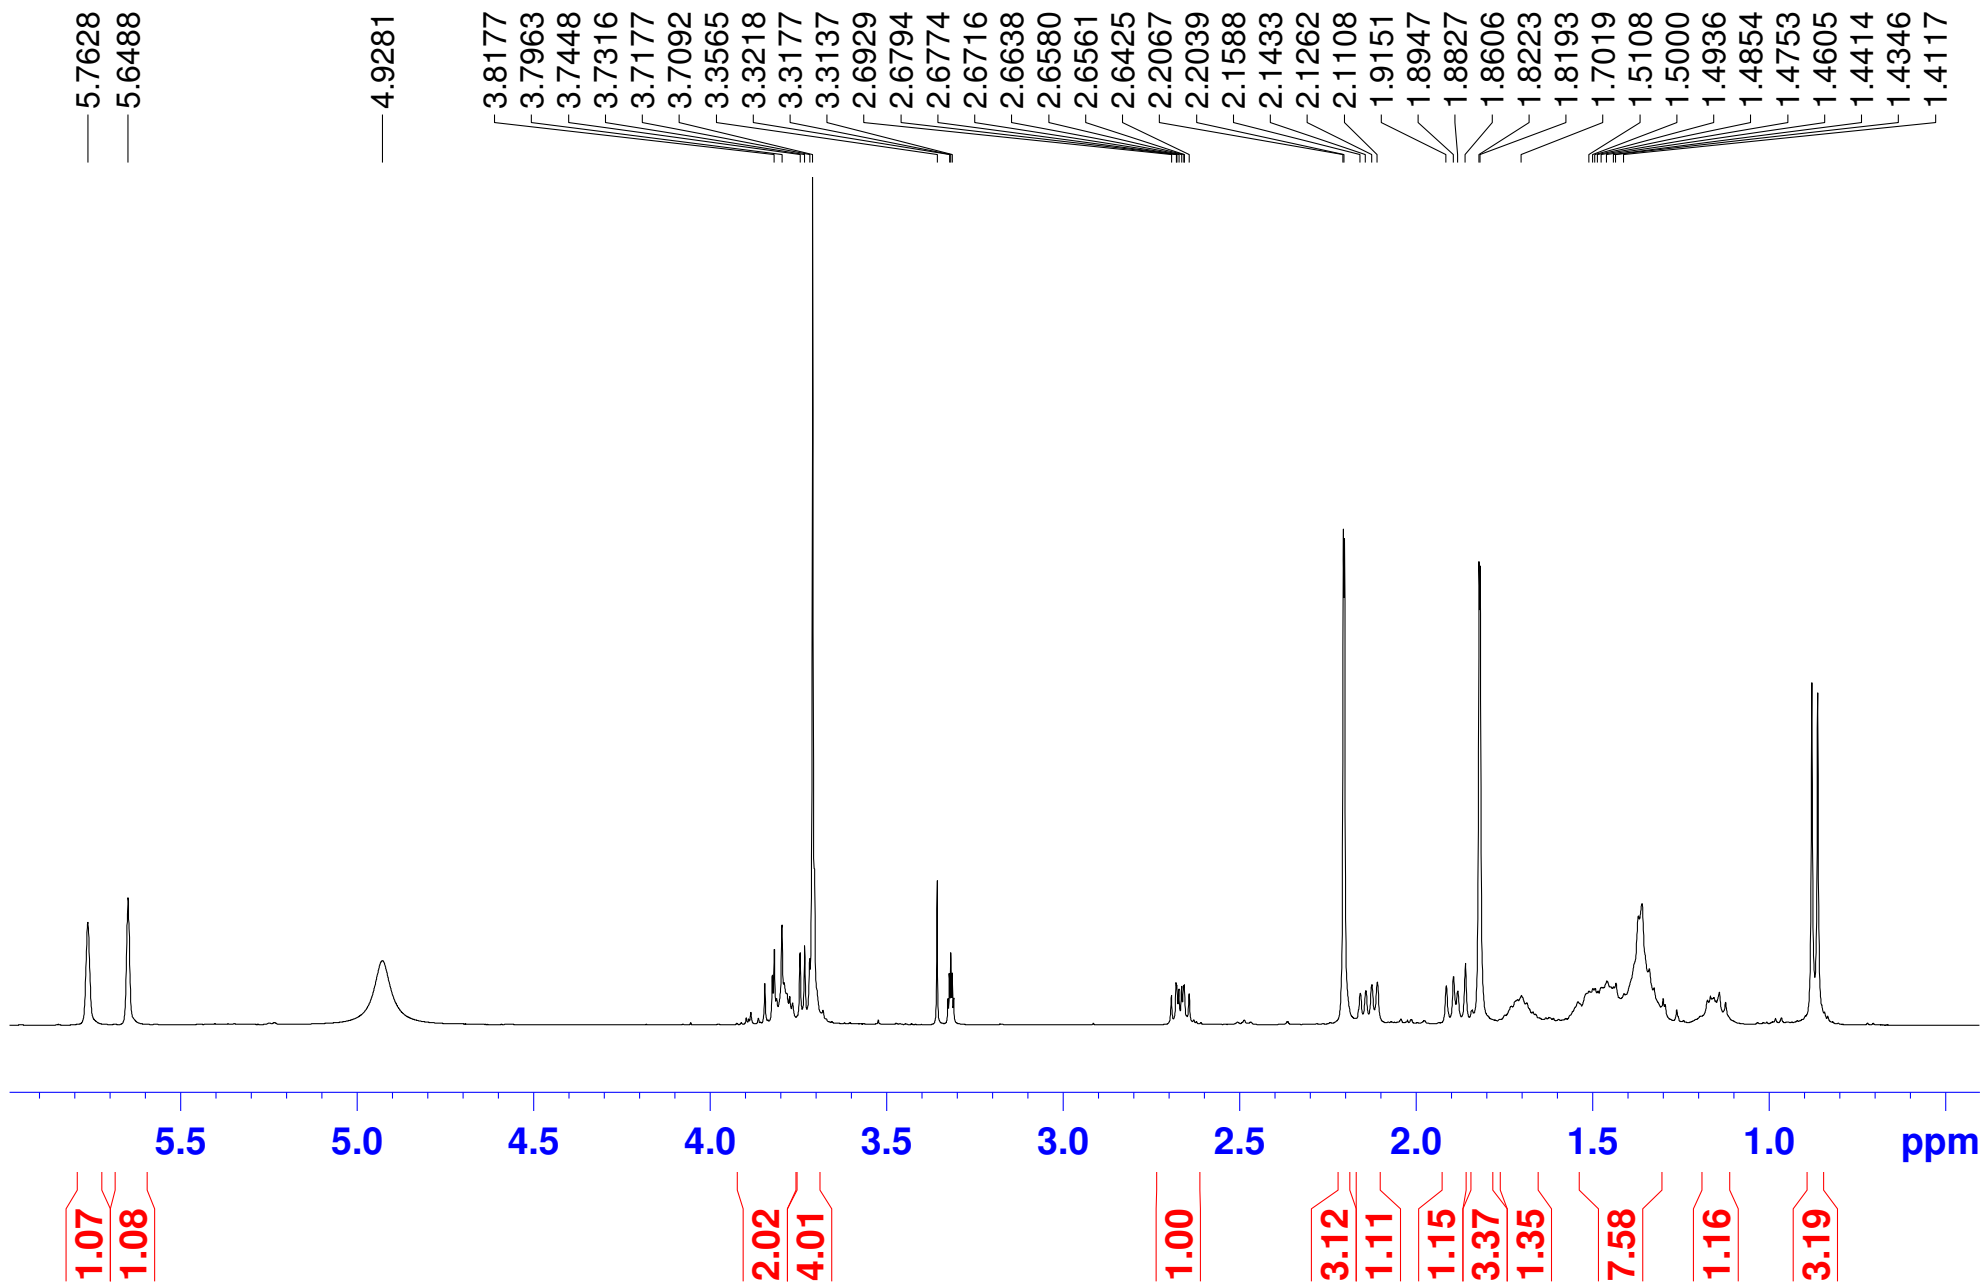

Figure S6-1 <sup>1</sup>H NMR Spectrum of **6** in CD<sub>3</sub>OD (400 MHz)

TF-18-1-1 <sup>13</sup>C NMR CD<sub>3</sub>OD 100MHz

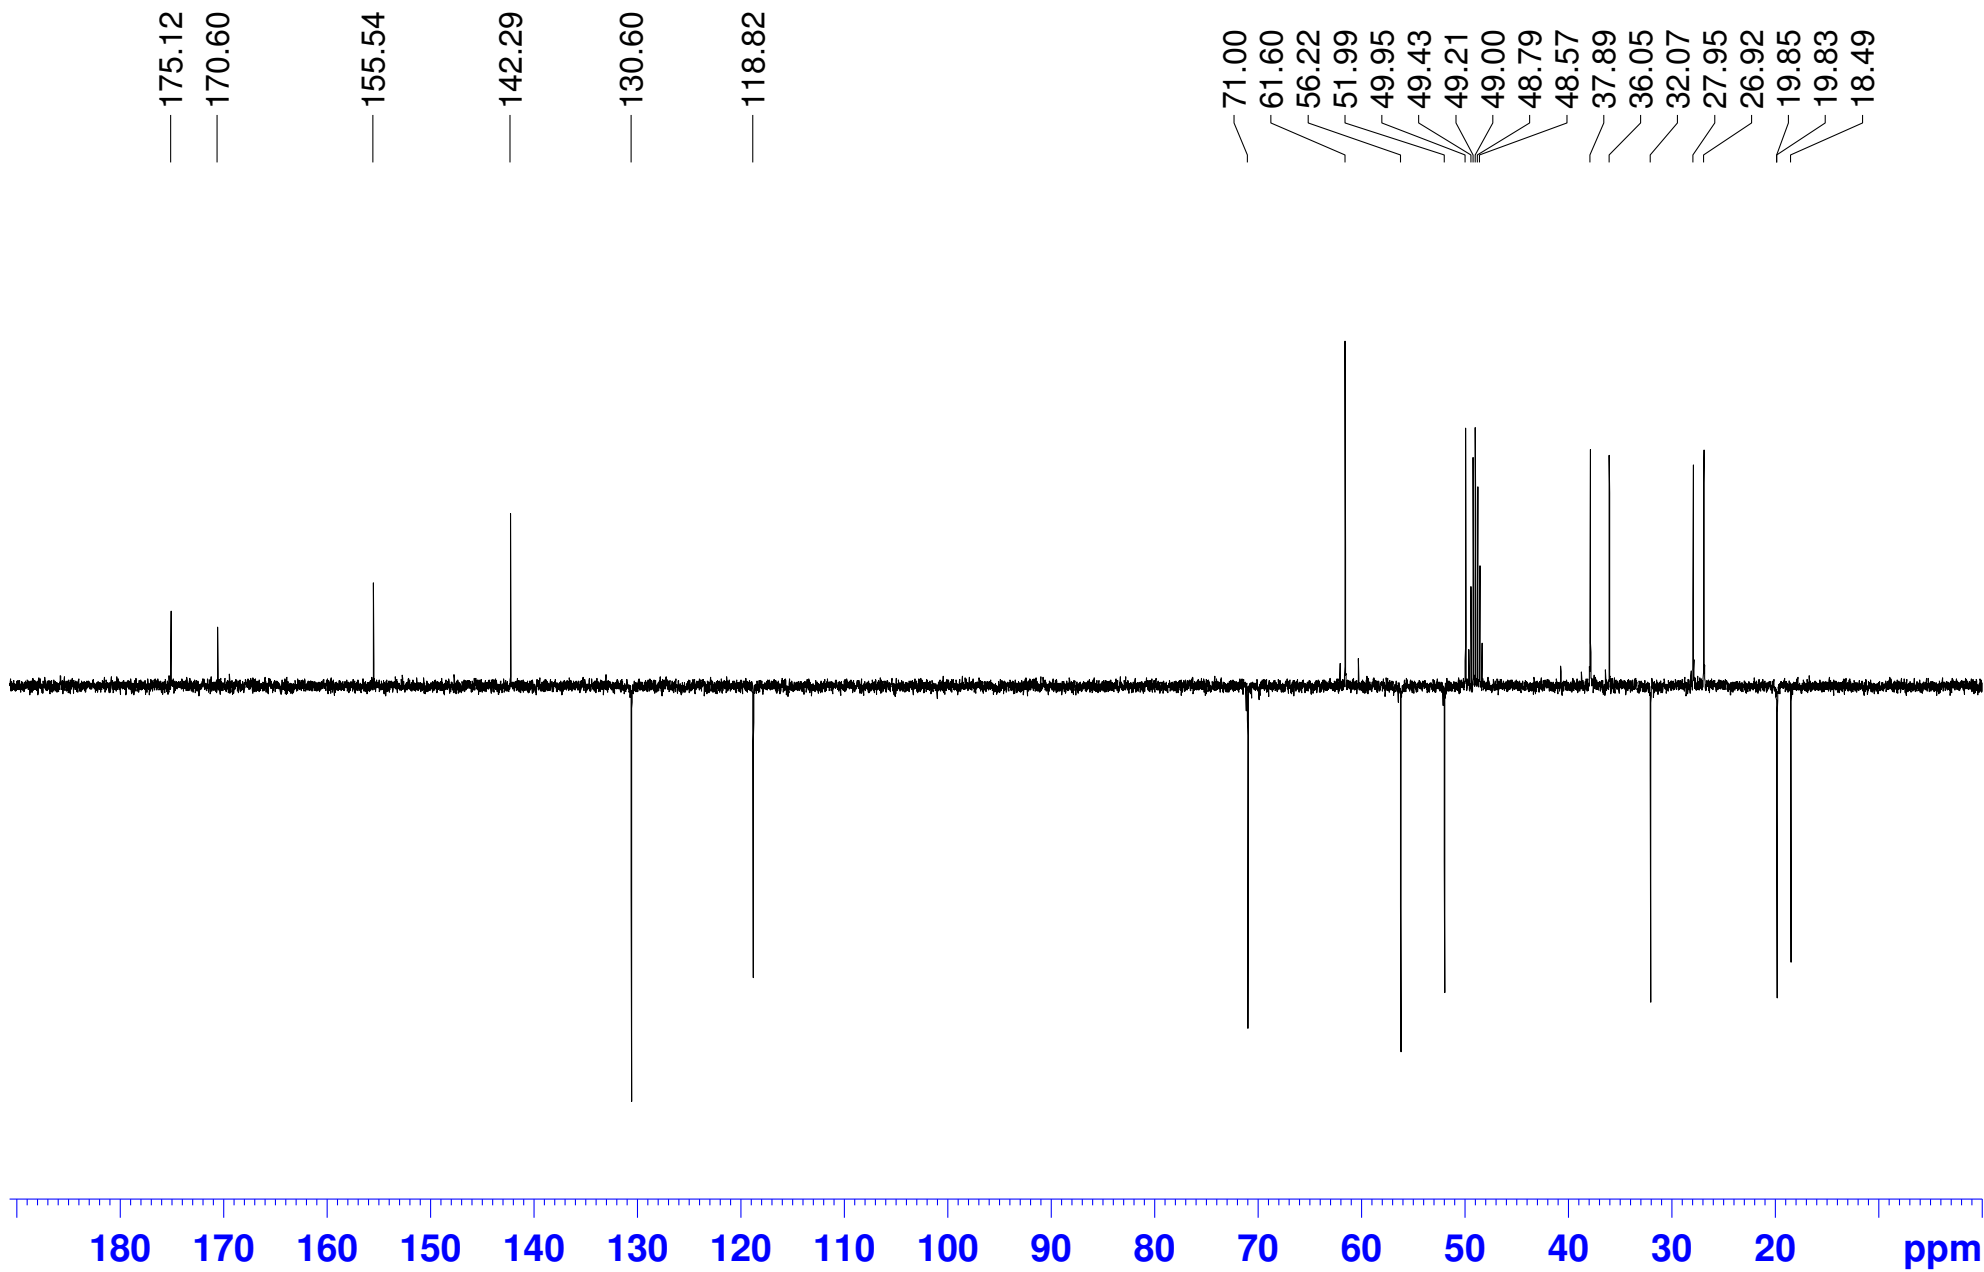

Figure S6-2 <sup>13</sup>C NMR Spectrum of **6** in CD<sub>3</sub>OD (100 MHz)

TF-14-6-2 <sup>1</sup>H NMR CD<sub>3</sub>OD 400 MHz

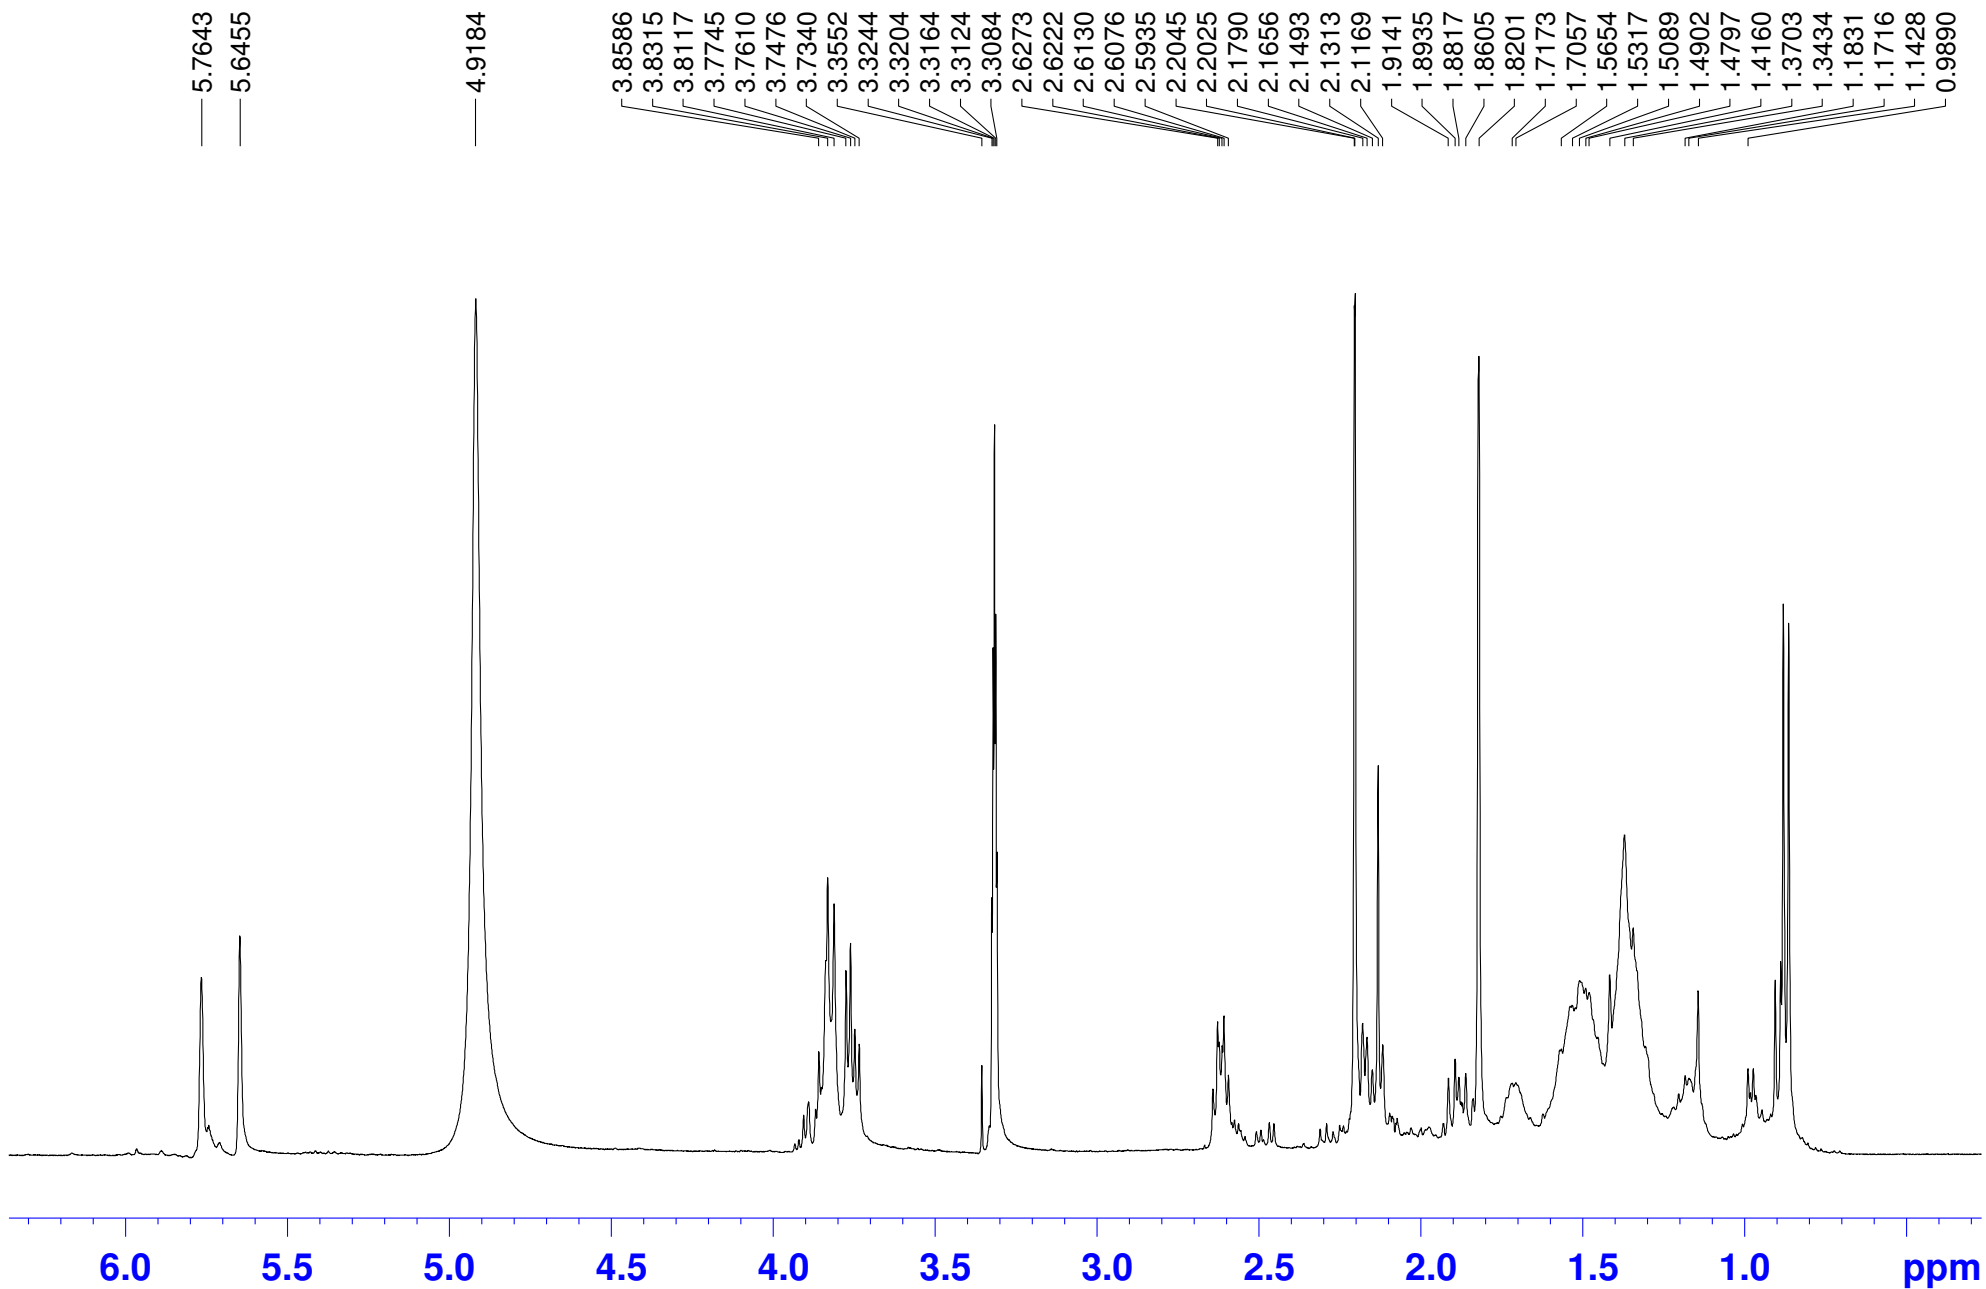

**Figure S7-1** <sup>1</sup>H NMR Spectrum of **7** in CD<sub>3</sub>OD (400 MHz)

TF-14-6-2 <sup>13</sup>C NMR CD<sub>3</sub>OD 100 MHz

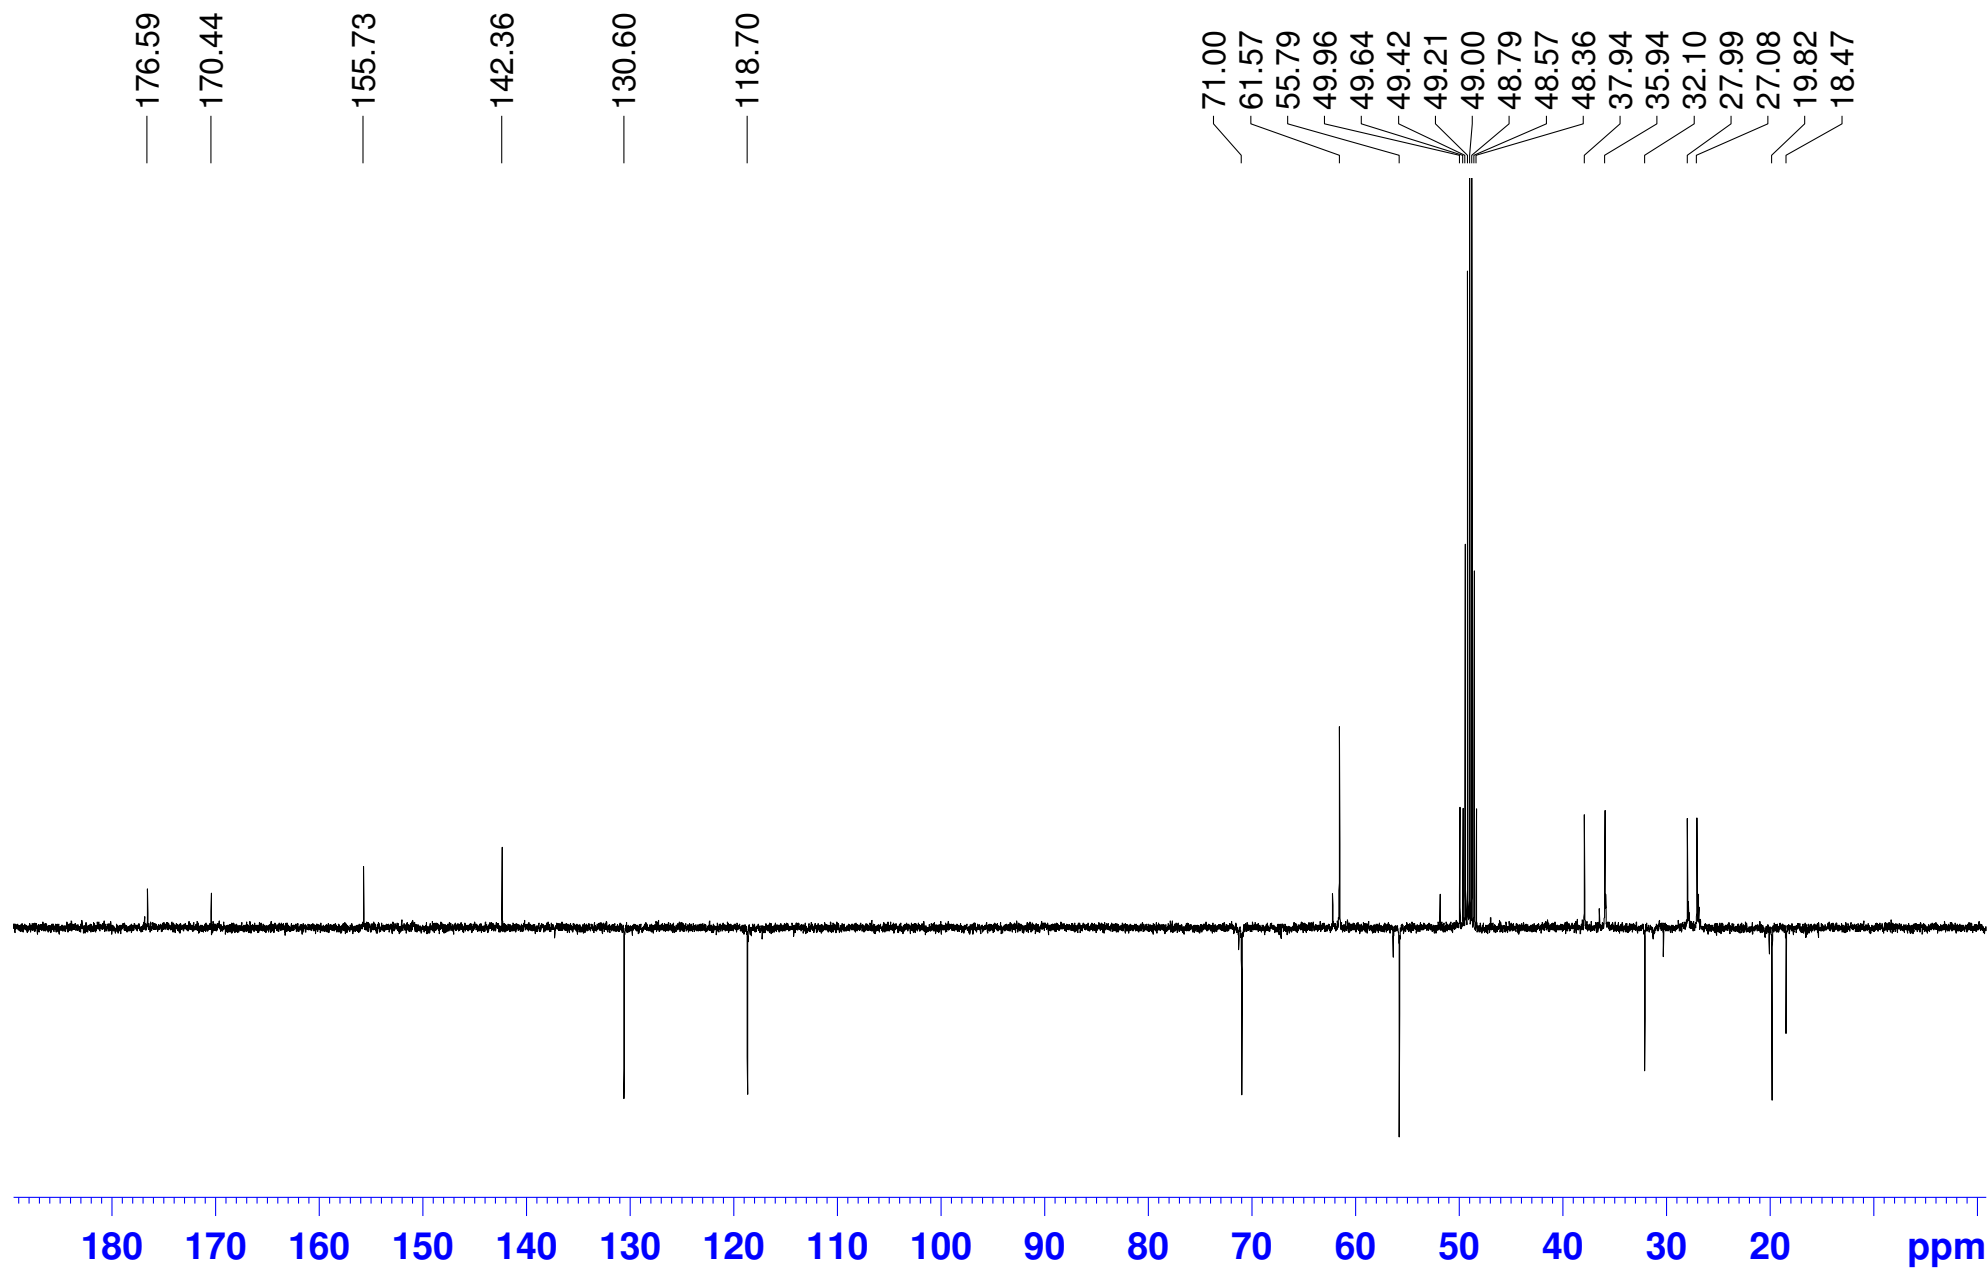

Figure S7-2 <sup>13</sup>C NMR Spectrum of 7 in CD<sub>3</sub>OD (100 MHz)



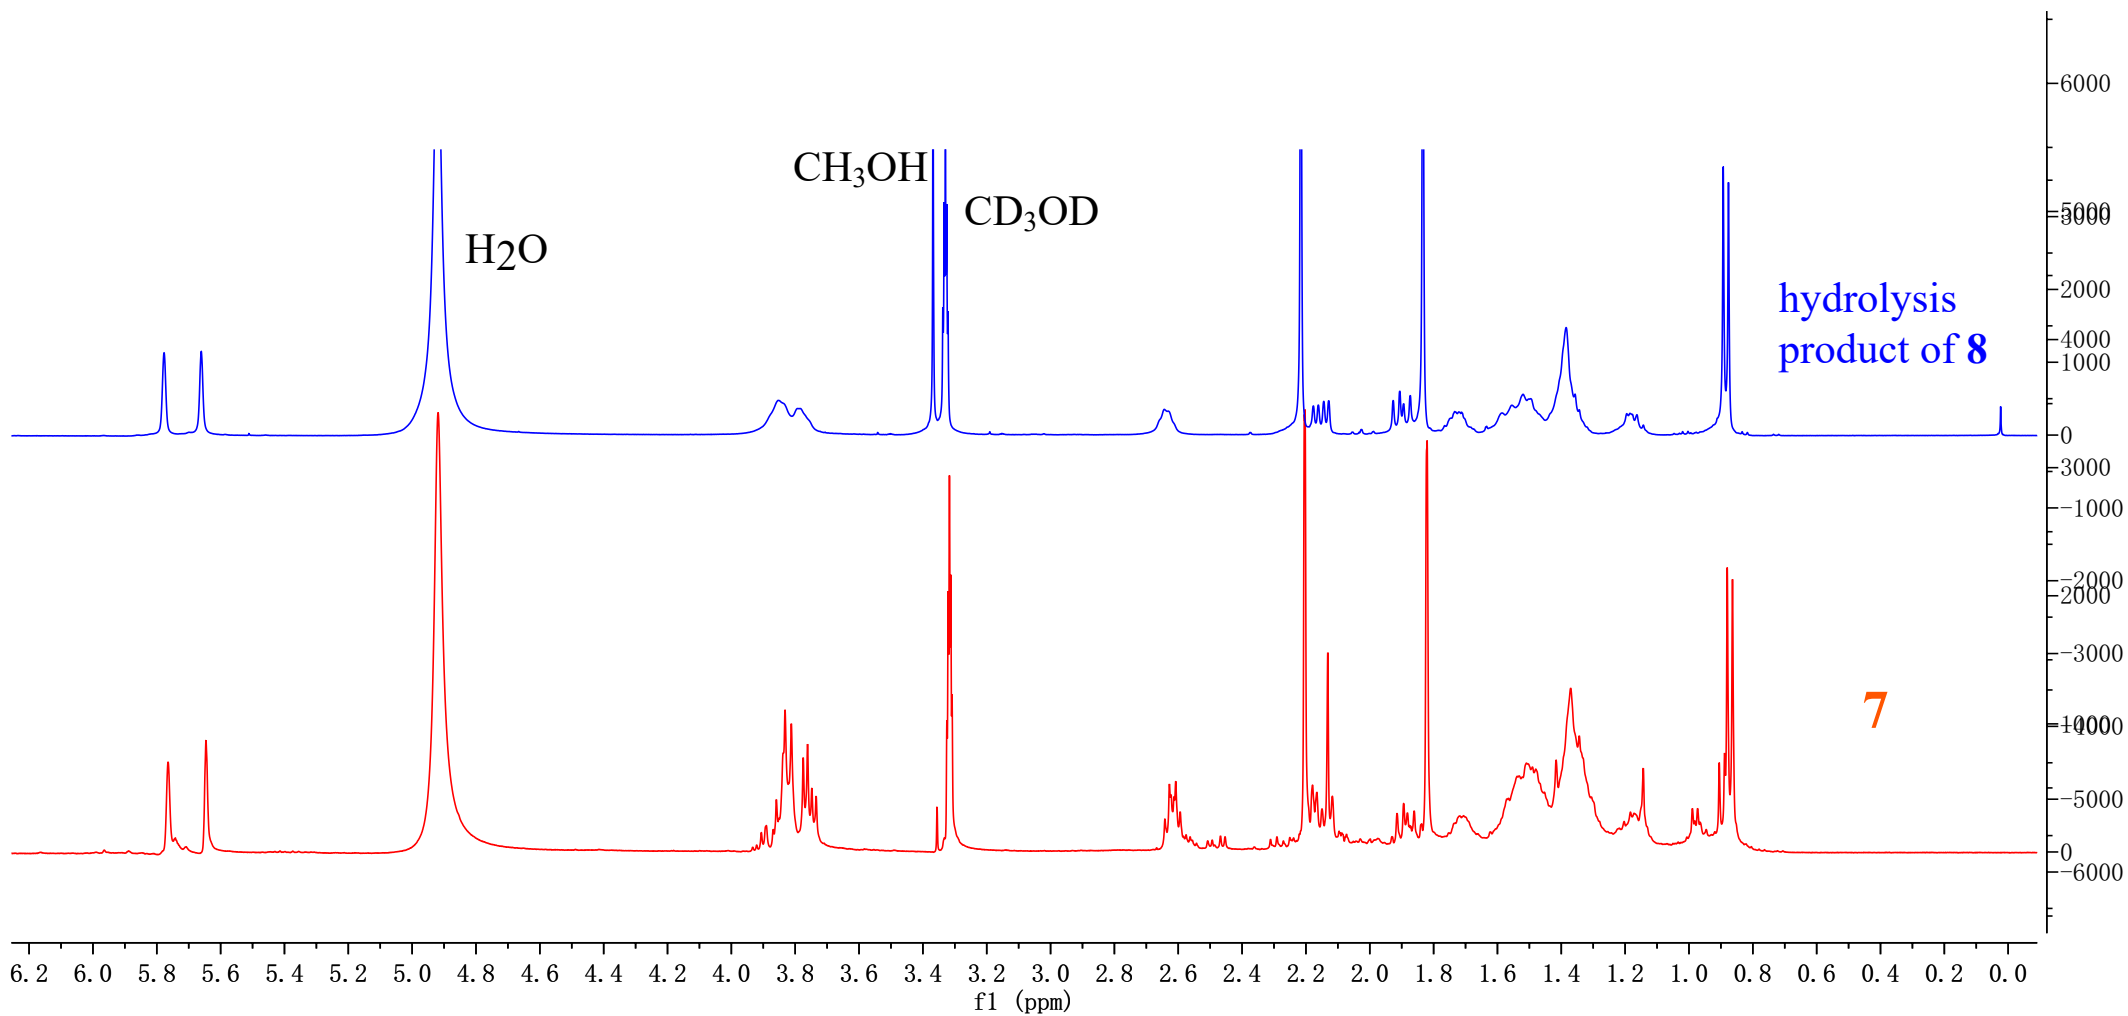

**Figure S8-1** Comparison of <sup>1</sup>H NMR Spectra of **7** and hydrolysis product of **8** (CD<sub>3</sub>OD, 400 MHz)

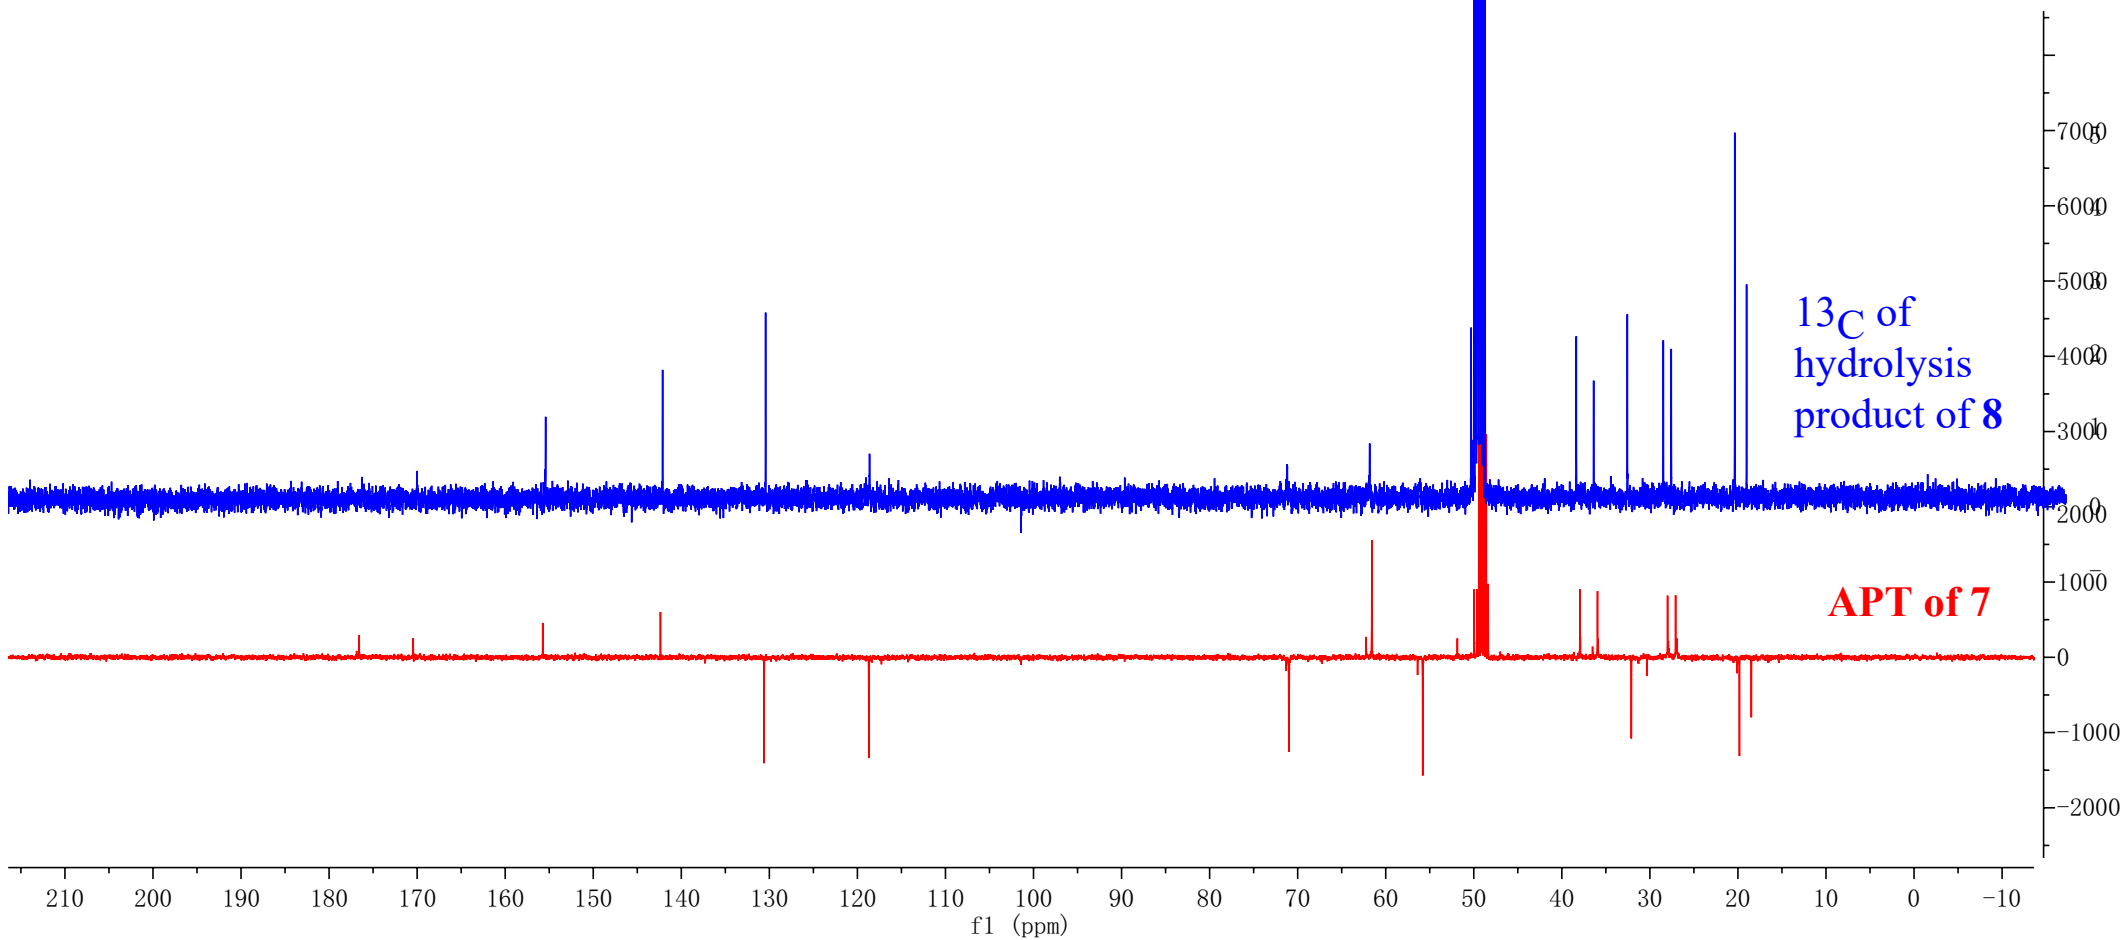

**Figure 8-2** Comparison of  $^{13}\text{C}$  NMR Spectra of **7** and hydrolysis product of **8** ( $\text{CD}_3\text{OD}$ , 100 MHz)

**Table S1. <sup>1</sup>H (400 MHz) and <sup>13</sup>C (100 MHz) NMR Data for 7 in CD<sub>3</sub>OD**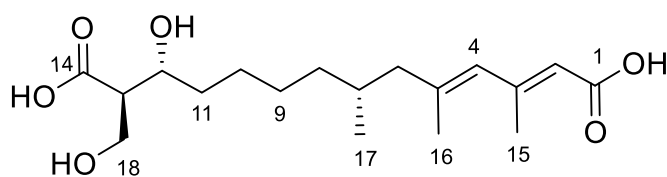**7/8a**

| Position | $\delta_{\text{H}}$                      | $\delta_{\text{C}}$   |
|----------|------------------------------------------|-----------------------|
| 1        |                                          | 170.4, C              |
| 2        | 5.65, br s                               | 118.7, CH             |
| 3        |                                          | 155.7, C              |
| 4        | 5.76, br s                               | 130.6, CH             |
| 5        |                                          | 142.4, C              |
| 6        | 2.14, m; 1.89, m                         | 50.1, CH <sub>2</sub> |
| 7        | 1.71, m                                  | 32.1, CH              |
| 8        | 1.35, m; 1.17, m                         | 37.9, CH <sub>2</sub> |
| 9        | 1.49, m; 1.37, m                         | 27.1, CH <sub>2</sub> |
| 10       | 1.37, m                                  | 28.0, CH <sub>2</sub> |
| 11       | 1.52, m                                  | 35.9, CH <sub>2</sub> |
| 12       | 3.83, m                                  | 71.0, CH              |
| 13       | 2.62, m                                  | 55.8, CH              |
| 14       |                                          | 176.6, C              |
| 15       | 2.20, d (0.9)                            | 19.8, CH <sub>3</sub> |
| 16       | 1.82, s                                  | 18.5, CH <sub>3</sub> |
| 17       | 0.87, d (6.6)                            | 19.8, CH <sub>3</sub> |
| 18       | 3.84, overlapped<br>3.75, dd (10.8, 5.5) | 61.6, CH <sub>2</sub> |
